# Supplementary material
Source: publisher figshare collection journal article supplement (https://acs.figshare.com/ndownloader/files/4198033)
Supplement: Supplementary file 1 [file 4198033]

 
data_complex-1 
 
_audit_creation_method            SHELXL-97 
_chemical_name_systematic 
; 
 ? 
; 
_chemical_name_common             ? 
_chemical_melting_point           ? 
_chemical_formula_moiety
 'C80 H96 N8 Nd6 O28, 4(C H4 O), 2(Cl)'
_chemical_formula_sum 
 'C84 H112 Cl2 N8 Nd6 O32' 
_chemical_formula_weight          2682.16 
 
loop_ 
 _atom_type_symbol 
 _atom_type_description 
 _atom_type_scat_dispersion_real 
 _atom_type_scat_dispersion_imag 
 _atom_type_scat_source 
 'C'  'C'   0.0033   0.0016 
 'International Tables Vol C Tables 4.2.6.8 and 6.1.1.4' 
 'H'  'H'   0.0000   0.0000 
 'International Tables Vol C Tables 4.2.6.8 and 6.1.1.4' 
 'N'  'N'   0.0061   0.0033 
 'International Tables Vol C Tables 4.2.6.8 and 6.1.1.4' 
 'O'  'O'   0.0106   0.0060 
 'International Tables Vol C Tables 4.2.6.8 and 6.1.1.4' 
 'Nd'  'Nd'  -0.1943   3.0179 
 'International Tables Vol C Tables 4.2.6.8 and 6.1.1.4' 
 'Cl'  'Cl'   0.1484   0.1585 
 'International Tables Vol C Tables 4.2.6.8 and 6.1.1.4' 
 
_symmetry_cell_setting            Triclinic 
_symmetry_space_group_name_H-M    P-1 
 
loop_ 
 _symmetry_equiv_pos_as_xyz 
 'x, y, z' 
 '-x, -y, -z' 
 
_cell_length_a                    12.657(3) 
_cell_length_b                    14.761(2) 
_cell_length_c                    15.796(3) 
_cell_angle_alpha                 78.89(3) 
_cell_angle_beta                  67.73(4) 
_cell_angle_gamma                 69.17(3) 
_cell_volume                      2547.0(11) 
_cell_formula_units_Z             1 
_cell_measurement_temperature     223(1) 
_cell_measurement_reflns_used     7076 
_cell_measurement_theta_min       1.3962 
_cell_measurement_theta_max       31.8338 
 
_exptl_crystal_description        Block 
_exptl_crystal_colour             Yellow 
_exptl_crystal_size_max           0.32 
_exptl_crystal_size_mid           0.10 
_exptl_crystal_size_min           0.05 
_exptl_crystal_density_meas       ? 
_exptl_crystal_density_diffrn     1.749 
_exptl_crystal_density_method     'not measured' 
_exptl_crystal_F_000              1322 
_exptl_absorpt_coefficient_mu     3.133 
_exptl_absorpt_correction_type    'Multi-scan' 
_exptl_absorpt_correction_T_min   0.5665 
_exptl_absorpt_correction_T_max   1.0000 
_exptl_absorpt_process_details    
'DENZO and Scalepack (Otwinoski and Minor, 1997)'
 
_exptl_special_details 
; 
 ? 
; 
 
_diffrn_ambient_temperature       223(1) 
_diffrn_radiation_wavelength      0.710747 
_diffrn_radiation_type            MoK\a 
_diffrn_radiation_source          'Sealed tube' 
_diffrn_radiation_monochromator   'Graphite Monochromator' 
_diffrn_measurement_device_type   'Mercury2 (2x2 bin mode)' 
_diffrn_measurement_method        'dtprofit.ref' 
_diffrn_detector_area_resol_mean  13.6612 
_diffrn_standards_number          ? 
_diffrn_standards_interval_count  ? 
_diffrn_standards_interval_time   ? 
_diffrn_standards_decay_%         ? 
_diffrn_reflns_number             22249 
_diffrn_reflns_av_R_equivalents   0.0391 
_diffrn_reflns_av_sigmaI/netI     0.0502 
_diffrn_reflns_limit_h_min        -15 
_diffrn_reflns_limit_h_max        15 
_diffrn_reflns_limit_k_min        -17 
_diffrn_reflns_limit_k_max        17 
_diffrn_reflns_limit_l_min        -18 
_diffrn_reflns_limit_l_max        18 
_diffrn_reflns_theta_min          2.65 
_diffrn_reflns_theta_max          25.00 
_reflns_number_total              8938 
_reflns_number_gt                 7699 
_reflns_threshold_expression      >2sigma(I) 
 
_publ_section_acknowledgements
;
The data were collected using instrumentation purchased with funds provided
by the National Science Foundation Grant No. 0741973.
;

_publ_section_references
;
Altomare A., Burla M.C., Camalli M., Cascarano G.L., Giacovazzo C., 
Guagliardi A., Moliterni A.G.G., Polidori G.,Spagna R. Sir97.  
(1999) J. Appl. Cryst. 32, 115-119.

Otwinowski, Z. and Minor, W.  (1997).  Methods in Enzymology,
276, Macromolecular Crystallography, part A, 307-326, C. W. Carter,
Jr. and R. M. Sweets, Eds., Academic Press.

Sheldrick, G. M.  (1998).  SHELXTL/PC.  Release 5.10.  Siemens 
Analytical X-ray Instruments, Inc., Madison, WI, USA.


;
_computing_data_collection        'Collect software, Nonius B.V. 1998'
_computing_cell_refinement        'Collect software, Nonius B.V. 1998'
_computing_data_reduction         
;
DENZO and Scalepack (Otwinoski and Minor, 1997)
;
_computing_structure_solution     
;

SIR97 - Altomare A., Burla M.C., Camalli M., Cascarano G.L., Giacovazzo C., 
Guagliardi A., Moliterni A.G.G., Polidori G.,Spagna R.
;
_computing_structure_refinement   'XL SHELXTL/PC, Siemens Analytical'
_computing_molecular_graphics     'XP SHELXTL/PC, Siemens Analytical' 
_computing_publication_material   ? 


  
_refine_special_details 
; 
 Refinement of F^2^ against ALL reflections.  The weighted R-factor wR and 
 goodness of fit S are based on F^2^, conventional R-factors R are based 
 on F, with F set to zero for negative F^2^. The threshold expression of 
 F^2^ > 2sigma(F^2^) is used only for calculating R-factors(gt) etc. and is 
 not relevant to the choice of reflections for refinement.  R-factors based 
 on F^2^ are statistically about twice as large as those based on F, and R- 
 factors based on ALL data will be even larger. 

 Restraints 32: The bond lengths of the uncoordinate MeOH are fixed; ISOR was 
 applied to uncoordinate MeOH atoms to allow their Uij components approximate
 to isotropic behavior.

;
 
_refine_ls_structure_factor_coef  Fsqd  
_refine_ls_matrix_type            full 
_refine_ls_weighting_scheme       calc  
_refine_ls_weighting_details 
 'calc w=1/[\s^2^(Fo^2^)+(0.0449P)^2^+6.1229P] where P=(Fo^2^+2Fc^2^)/3' 
_atom_sites_solution_primary      direct 
_atom_sites_solution_secondary    difmap 
_atom_sites_solution_hydrogens    geom 
_refine_ls_hydrogen_treatment     constr 
_refine_ls_extinction_method      none 
_refine_ls_extinction_coef        ? 
_refine_ls_number_reflns          8938 
_refine_ls_number_parameters      595 
_refine_ls_number_restraints      32 
_refine_ls_R_factor_all           0.0485 
_refine_ls_R_factor_gt            0.0402 
_refine_ls_wR_factor_ref          0.1069 
_refine_ls_wR_factor_gt           0.1000 
_refine_ls_goodness_of_fit_ref    1.062 
_refine_ls_restrained_S_all       1.094 
_refine_ls_shift/su_max           0.001 
_refine_ls_shift/su_mean          0.000 
 
loop_ 
 _atom_site_label 
 _atom_site_type_symbol 
 _atom_site_fract_x 
 _atom_site_fract_y 
 _atom_site_fract_z 
 _atom_site_U_iso_or_equiv 
 _atom_site_adp_type 
 _atom_site_occupancy 
 _atom_site_symmetry_multiplicity 
 _atom_site_calc_flag 
 _atom_site_refinement_flags 
 _atom_site_disorder_assembly 
 _atom_site_disorder_group 
Nd1 Nd 0.88703(3) 0.43429(2) 0.49871(2) 0.02835(10) Uani 1 1 d . . . 
Nd2 Nd 0.94431(3) 0.42091(2) 0.70867(2) 0.02885(10) Uani 1 1 d . . . 
Nd3 Nd 0.84112(3) 0.23372(2) 0.67780(2) 0.02841(10) Uani 1 1 d . . . 
Cl1 Cl 0.24949(18) 0.13785(13) 0.51755(15) 0.0566(5) Uani 1 1 d . . . 
O1 O 1.1750(5) 0.8785(3) 0.4269(3) 0.0460(12) Uani 1 1 d . . . 
O2 O 1.1997(4) 0.6964(3) 0.4605(3) 0.0385(10) Uani 1 1 d . . . 
O3 O 1.1327(4) 0.4346(3) 0.6081(3) 0.0435(12) Uani 1 1 d . . . 
O4 O 0.8899(4) 0.2813(3) 0.7931(3) 0.0389(10) Uani 1 1 d . . . 
O5 O 0.7072(5) 0.2435(4) 0.9322(4) 0.0651(16) Uani 1 1 d . . . 
O6 O 1.0828(6) 0.6045(5) 0.8321(4) 0.0750(18) Uani 1 1 d . . . 
O7 O 0.9509(5) 0.5396(4) 0.7838(4) 0.0612(15) Uani 1 1 d . . . 
O8 O 0.7787(4) 0.4118(3) 0.6701(3) 0.0322(9) Uani 1 1 d . . . 
O9 O 0.7653(4) 0.1207(3) 0.7714(3) 0.0448(12) Uani 1 1 d . . . 
O10 O 0.7823(5) -0.0600(4) 0.8382(4) 0.0675(17) Uani 1 1 d . . . 
O11 O 0.9919(4) 0.3123(3) 0.5893(3) 0.0321(9) Uani 1 1 d . . . 
H11C H 1.0752 0.2730 0.5601 0.039 Uiso 1 1 calc R . . 
O12 O 0.9186(4) 0.5395(3) 0.5826(3) 0.0310(9) Uani 1 1 d . . . 
H12B H 0.8513 0.5991 0.6008 0.037 Uiso 1 1 calc R . . 
O13 O 1.0262(4) 0.0962(3) 0.6588(4) 0.0516(13) Uani 1 1 d . . . 
H13A H 1.0780 0.1229 0.6444 0.062 Uiso 1 1 calc R . . 
O14 O 0.9648(5) 0.3440(4) 0.3614(3) 0.0541(13) Uani 1 1 d . . . 
H14B H 1.0124 0.3721 0.3269 0.065 Uiso 1 1 calc R . . 
N1 N 1.3071(5) 0.5146(4) 0.5401(4) 0.0439(14) Uani 1 1 d . . . 
N2 N 1.1219(6) 0.3023(6) 0.7523(5) 0.071(2) Uani 1 1 d . . . 
N3 N 0.7362(5) 0.4917(4) 0.8290(4) 0.0462(14) Uani 1 1 d . . . 
N4 N 0.6154(5) 0.3076(4) 0.7351(4) 0.0383(13) Uani 1 1 d . . . 
C1 C 1.1561(8) 0.9817(5) 0.4091(6) 0.060(2) Uani 1 1 d . . . 
H1B H 1.1082 1.0078 0.3701 0.090 Uiso 1 1 calc R . . 
H1C H 1.2322 0.9933 0.3795 0.090 Uiso 1 1 calc R . . 
H1D H 1.1152 1.0128 0.4660 0.090 Uiso 1 1 calc R . . 
C2 C 1.2428(6) 0.8297(5) 0.4829(5) 0.0411(16) Uani 1 1 d . . . 
C3 C 1.2942(8) 0.8725(6) 0.5202(6) 0.061(2) Uani 1 1 d . . . 
H3A H 1.2853 0.9386 0.5090 0.073 Uiso 1 1 calc R . . 
C4 C 1.3599(9) 0.8140(7) 0.5754(7) 0.074(3) Uani 1 1 d . . . 
H4A H 1.3944 0.8416 0.6019 0.088 Uiso 1 1 calc R . . 
C5 C 1.3743(8) 0.7165(7) 0.5912(6) 0.064(2) Uani 1 1 d . . . 
H5A H 1.4179 0.6791 0.6286 0.077 Uiso 1 1 calc R . . 
C6 C 1.3239(6) 0.6718(6) 0.5515(5) 0.0454(17) Uani 1 1 d . . . 
C7 C 1.2545(6) 0.7301(5) 0.4989(5) 0.0382(15) Uani 1 1 d . . . 
C8 C 1.3487(6) 0.5670(6) 0.5673(5) 0.0478(18) Uani 1 1 d . . . 
H8A H 1.4000 0.5347 0.6005 0.057 Uiso 1 1 calc R . . 
C9 C 1.3441(7) 0.4102(6) 0.5652(7) 0.063(2) Uani 1 1 d . . . 
H9A H 1.4009 0.3944 0.5973 0.076 Uiso 1 1 calc R . . 
H9B H 1.3819 0.3738 0.5108 0.076 Uiso 1 1 calc R . . 
C10 C 1.2347(9) 0.3861(9) 0.6250(9) 0.108(4) Uani 1 1 d DU . . 
H10A H 1.2172 0.4340 0.6676 0.130 Uiso 1 1 calc R . . 
C11 C 1.2372(11) 0.3096(10) 0.6972(9) 0.131(5) Uani 1 1 d DU . . 
H11A H 1.2868 0.2482 0.6701 0.157 Uiso 1 1 calc R . . 
H11B H 1.2743 0.3210 0.7361 0.157 Uiso 1 1 calc R . . 
C12 C 1.1285(8) 0.2268(7) 0.8102(5) 0.060(2) Uani 1 1 d . . . 
H12A H 1.2047 0.1872 0.8095 0.073 Uiso 1 1 calc R . . 
C13 C 1.0273(7) 0.1996(5) 0.8753(5) 0.0476(18) Uani 1 1 d . . . 
C14 C 1.0496(9) 0.1393(6) 0.9516(6) 0.060(2) Uani 1 1 d . . . 
H14A H 1.1271 0.1155 0.9540 0.072 Uiso 1 1 calc R . . 
C15 C 0.9578(10) 0.1156(6) 1.0223(6) 0.070(3) Uani 1 1 d . . . 
H15A H 0.9729 0.0774 1.0731 0.084 Uiso 1 1 calc R . . 
C16 C 0.8405(9) 0.1489(6) 1.0184(5) 0.065(2) Uani 1 1 d . . . 
H16B H 0.7786 0.1322 1.0665 0.077 Uiso 1 1 calc R . . 
C17 C 0.8174(8) 0.2067(5) 0.9426(5) 0.0499(19) Uani 1 1 d . . . 
C18 C 0.9110(7) 0.2310(4) 0.8691(4) 0.0378(16) Uani 1 1 d . . . 
C19 C 0.6104(9) 0.2167(9) 1.0010(7) 0.090(3) Uani 1 1 d . . . 
H19A H 0.5387 0.2470 0.9856 0.135 Uiso 1 1 calc R . . 
H19B H 0.5984 0.2375 1.0588 0.135 Uiso 1 1 calc R . . 
H19C H 0.6286 0.1474 1.0053 0.135 Uiso 1 1 calc R . . 
C20 C 1.1576(10) 0.6437(8) 0.8555(9) 0.101(4) Uani 1 1 d . . . 
H20A H 1.2303 0.6404 0.8044 0.151 Uiso 1 1 calc R . . 
H20B H 1.1767 0.6066 0.9077 0.151 Uiso 1 1 calc R . . 
H20C H 1.1151 0.7102 0.8699 0.151 Uiso 1 1 calc R . . 
C21 C 0.9743(8) 0.6018(6) 0.8975(6) 0.059(2) Uani 1 1 d . . . 
C22 C 0.9318(10) 0.6287(6) 0.9866(6) 0.070(3) Uani 1 1 d . . . 
H22A H 0.9792 0.6491 1.0069 0.084 Uiso 1 1 calc R . . 
C23 C 0.8203(9) 0.6257(7) 1.0455(6) 0.074(3) Uani 1 1 d . . . 
H23A H 0.7936 0.6430 1.1054 0.089 Uiso 1 1 calc R . . 
C24 C 0.7478(9) 0.5971(7) 1.0163(6) 0.070(3) Uani 1 1 d . . . 
H24A H 0.6709 0.5984 1.0555 0.084 Uiso 1 1 calc R . . 
C25 C 0.7905(8) 0.5659(6) 0.9268(6) 0.059(2) Uani 1 1 d . . . 
C26 C 0.9091(8) 0.5665(5) 0.8614(6) 0.055(2) Uani 1 1 d . . . 
C27 C 0.7104(8) 0.5335(6) 0.9009(6) 0.061(2) Uani 1 1 d . . . 
H27A H 0.6321 0.5447 0.9416 0.073 Uiso 1 1 calc R . . 
C28 C 0.6409(6) 0.4615(6) 0.8208(5) 0.0484(18) Uani 1 1 d . . . 
H28A H 0.5627 0.5056 0.8520 0.058 Uiso 1 1 calc R . . 
H28B H 0.6448 0.3967 0.8497 0.058 Uiso 1 1 calc R . . 
C29 C 0.6573(6) 0.4625(5) 0.7196(5) 0.0393(15) Uani 1 1 d . . . 
H29A H 0.6372 0.5299 0.6941 0.047 Uiso 1 1 calc R . . 
C30 C 0.5757(6) 0.4131(5) 0.7084(5) 0.0421(16) Uani 1 1 d . . . 
H30A H 0.4934 0.4423 0.7466 0.050 Uiso 1 1 calc R . . 
H30B H 0.5788 0.4224 0.6451 0.050 Uiso 1 1 calc R . . 
C31 C 0.5348(6) 0.2672(5) 0.7806(4) 0.0374(15) Uani 1 1 d . . . 
H31A H 0.4558 0.3076 0.7937 0.045 Uiso 1 1 calc R . . 
C32 C 0.5504(6) 0.1672(5) 0.8143(5) 0.0405(16) Uani 1 1 d . . . 
C33 C 0.4465(7) 0.1381(6) 0.8559(5) 0.0523(19) Uani 1 1 d . . . 
H33A H 0.3719 0.1839 0.8610 0.063 Uiso 1 1 calc R . . 
C34 C 0.4526(8) 0.0439(6) 0.8889(6) 0.060(2) Uani 1 1 d . . . 
H34A H 0.3830 0.0260 0.9150 0.072 Uiso 1 1 calc R . . 
C35 C 0.5639(8) -0.0245(6) 0.8831(6) 0.057(2) Uani 1 1 d . . . 
H35A H 0.5684 -0.0885 0.9048 0.069 Uiso 1 1 calc R . . 
C36 C 0.6678(7) 0.0015(5) 0.8453(5) 0.0486(18) Uani 1 1 d . . . 
C37 C 0.6654(6) 0.0978(5) 0.8078(4) 0.0401(16) Uani 1 1 d . . . 
C38 C 0.7931(9) -0.1544(6) 0.8829(6) 0.072(3) Uani 1 1 d . . . 
H38A H 0.8762 -0.1893 0.8739 0.108 Uiso 1 1 calc R . . 
H38B H 0.7611 -0.1887 0.8579 0.108 Uiso 1 1 calc R . . 
H38C H 0.7492 -0.1491 0.9474 0.108 Uiso 1 1 calc R . . 
C39 C 1.0503(8) 0.0121(6) 0.7254(6) 0.069(2) Uani 1 1 d . . . 
H39A H 1.1303 -0.0307 0.6996 0.103 Uiso 1 1 calc R . . 
H39B H 0.9936 -0.0223 0.7384 0.103 Uiso 1 1 calc R . . 
H39C H 1.0425 0.0349 0.7810 0.103 Uiso 1 1 calc R . . 
C40 C 1.0150(9) 0.2430(6) 0.3486(7) 0.083(3) Uani 1 1 d . . . 
H40A H 1.0364 0.2328 0.2853 0.124 Uiso 1 1 calc R . . 
H40B H 0.9572 0.2107 0.3858 0.124 Uiso 1 1 calc R . . 
H40C H 1.0855 0.2172 0.3661 0.124 Uiso 1 1 calc R . . 
C41 C 0.6283(18) 0.7449(13) 0.7164(13) 0.194(8) Uani 1 1 d U . . 
H41A H 0.6777 0.7216 0.7544 0.291 Uiso 1 1 calc R . . 
H41B H 0.5539 0.7308 0.7476 0.291 Uiso 1 1 calc R . . 
H41C H 0.6124 0.8138 0.7037 0.291 Uiso 1 1 calc R . . 
O15 O 0.6963(7) 0.6924(5) 0.6227(6) 0.114(3) Uani 1 1 d . . . 
H15B H 0.7023 0.7334 0.5795 0.172 Uiso 1 1 calc R . . 
C42 C 0.4603(12) 0.0285(9) 0.6502(8) 0.112(4) Uani 1 1 d DU . . 
H42B H 0.4185 0.0962 0.6418 0.168 Uiso 1 1 calc R . . 
H42C H 0.4871 -0.0022 0.5941 0.168 Uiso 1 1 calc R . . 
H42D H 0.5283 0.0218 0.6668 0.168 Uiso 1 1 calc R . . 
O16 O 0.3690(11) -0.0237(9) 0.7324(8) 0.194(5) Uani 1 1 d DU . . 
H16A H 0.3436 0.0041 0.7797 0.291 Uiso 1 1 calc R . . 
 
loop_ 
 _atom_site_aniso_label 
 _atom_site_aniso_U_11 
 _atom_site_aniso_U_22 
 _atom_site_aniso_U_33 
 _atom_site_aniso_U_23 
 _atom_site_aniso_U_13 
 _atom_site_aniso_U_12 
Nd1 0.03239(19) 0.02548(17) 0.02850(18) 0.00193(13) -0.00958(14) -0.01323(14) 
Nd2 0.03599(19) 0.02538(17) 0.02589(18) -0.00097(13) -0.00787(14) -0.01354(14) 
Nd3 0.02986(18) 0.02375(17) 0.03185(19) 0.00234(13) -0.00916(14) -0.01217(14) 
Cl1 0.0536(11) 0.0413(10) 0.0669(13) -0.0101(9) -0.0090(10) -0.0145(9) 
O1 0.061(3) 0.034(2) 0.053(3) 0.002(2) -0.025(3) -0.024(2) 
O2 0.043(3) 0.039(3) 0.041(3) 0.003(2) -0.017(2) -0.021(2) 
O3 0.032(2) 0.036(2) 0.053(3) 0.015(2) -0.014(2) -0.010(2) 
O4 0.050(3) 0.041(3) 0.030(2) 0.003(2) -0.015(2) -0.020(2) 
O5 0.064(4) 0.071(4) 0.054(3) 0.014(3) -0.007(3) -0.037(3) 
O6 0.094(5) 0.078(4) 0.069(4) -0.013(3) -0.024(4) -0.044(4) 
O7 0.070(4) 0.051(3) 0.053(3) -0.013(3) 0.006(3) -0.033(3) 
O8 0.035(2) 0.030(2) 0.030(2) -0.0033(18) -0.0065(19) -0.0116(18) 
O9 0.038(3) 0.039(3) 0.054(3) 0.009(2) -0.010(2) -0.020(2) 
O10 0.061(4) 0.040(3) 0.078(4) 0.021(3) -0.008(3) -0.017(3) 
O11 0.033(2) 0.028(2) 0.033(2) -0.0004(18) -0.0084(19) -0.0091(18) 
O12 0.033(2) 0.025(2) 0.035(2) -0.0012(18) -0.0098(19) -0.0110(18) 
O13 0.041(3) 0.036(3) 0.068(3) 0.005(2) -0.014(3) -0.009(2) 
O14 0.072(4) 0.042(3) 0.047(3) -0.010(2) -0.007(3) -0.028(3) 
N1 0.035(3) 0.042(3) 0.049(4) 0.001(3) -0.016(3) -0.006(3) 
N2 0.051(4) 0.108(6) 0.060(4) 0.042(4) -0.032(4) -0.041(4) 
N3 0.052(4) 0.046(3) 0.037(3) -0.009(3) -0.005(3) -0.018(3) 
N4 0.036(3) 0.036(3) 0.040(3) 0.005(2) -0.008(3) -0.016(2) 
C1 0.079(6) 0.044(4) 0.073(6) -0.004(4) -0.034(5) -0.027(4) 
C2 0.045(4) 0.041(4) 0.045(4) -0.003(3) -0.016(3) -0.020(3) 
C3 0.065(5) 0.053(5) 0.080(6) -0.020(4) -0.028(5) -0.025(4) 
C4 0.080(6) 0.073(6) 0.098(7) -0.022(6) -0.056(6) -0.022(5) 
C5 0.064(5) 0.078(6) 0.074(6) -0.015(5) -0.042(5) -0.024(5) 
C6 0.041(4) 0.060(5) 0.039(4) -0.002(3) -0.015(3) -0.019(4) 
C7 0.034(3) 0.047(4) 0.040(4) -0.004(3) -0.015(3) -0.017(3) 
C8 0.040(4) 0.057(5) 0.045(4) 0.004(4) -0.017(3) -0.013(4) 
C9 0.040(4) 0.047(5) 0.088(6) 0.018(4) -0.019(4) -0.012(4) 
C10 0.052(5) 0.105(7) 0.133(8) 0.065(6) -0.028(5) -0.025(5) 
C11 0.086(7) 0.172(9) 0.126(8) 0.066(7) -0.053(6) -0.050(6) 
C12 0.066(5) 0.079(6) 0.046(4) 0.019(4) -0.034(4) -0.029(5) 
C13 0.072(5) 0.041(4) 0.040(4) 0.001(3) -0.028(4) -0.022(4) 
C14 0.084(6) 0.054(5) 0.053(5) 0.023(4) -0.040(5) -0.031(5) 
C15 0.114(8) 0.056(5) 0.055(5) 0.025(4) -0.048(6) -0.037(5) 
C16 0.101(7) 0.055(5) 0.041(4) 0.020(4) -0.022(5) -0.042(5) 
C17 0.066(5) 0.046(4) 0.039(4) 0.003(3) -0.014(4) -0.027(4) 
C18 0.065(5) 0.028(3) 0.032(3) 0.003(3) -0.024(3) -0.022(3) 
C19 0.085(7) 0.121(9) 0.063(6) 0.025(6) -0.009(5) -0.065(7) 
C20 0.104(9) 0.096(8) 0.136(11) -0.028(8) -0.058(8) -0.042(7) 
C21 0.079(6) 0.045(4) 0.051(5) -0.005(4) -0.025(5) -0.015(4) 
C22 0.112(8) 0.044(5) 0.062(6) -0.011(4) -0.047(6) -0.010(5) 
C23 0.089(7) 0.085(7) 0.044(5) -0.025(5) -0.016(5) -0.018(6) 
C24 0.091(7) 0.073(6) 0.039(5) -0.011(4) -0.014(5) -0.021(5) 
C25 0.079(6) 0.044(4) 0.050(5) -0.006(4) -0.020(4) -0.017(4) 
C26 0.086(6) 0.033(4) 0.062(5) 0.006(4) -0.039(5) -0.027(4) 
C27 0.068(5) 0.058(5) 0.046(5) -0.009(4) -0.005(4) -0.020(4) 
C28 0.041(4) 0.054(4) 0.038(4) -0.006(3) 0.003(3) -0.016(3) 
C29 0.031(3) 0.031(3) 0.043(4) 0.001(3) -0.004(3) -0.005(3) 
C30 0.029(3) 0.036(4) 0.051(4) 0.002(3) -0.010(3) -0.003(3) 
C31 0.032(3) 0.039(4) 0.038(4) 0.000(3) -0.011(3) -0.010(3) 
C32 0.044(4) 0.043(4) 0.040(4) 0.006(3) -0.015(3) -0.024(3) 
C33 0.042(4) 0.065(5) 0.054(5) 0.003(4) -0.013(4) -0.029(4) 
C34 0.055(5) 0.067(5) 0.068(6) 0.013(4) -0.020(4) -0.041(4) 
C35 0.065(5) 0.045(4) 0.062(5) 0.011(4) -0.014(4) -0.034(4) 
C36 0.055(5) 0.047(4) 0.041(4) 0.010(3) -0.009(4) -0.028(4) 
C37 0.049(4) 0.041(4) 0.031(3) 0.001(3) -0.008(3) -0.022(3) 
C38 0.085(7) 0.045(5) 0.072(6) 0.015(4) -0.021(5) -0.020(5) 
C39 0.065(6) 0.060(5) 0.073(6) 0.008(5) -0.022(5) -0.018(4) 
C40 0.083(7) 0.054(5) 0.081(7) -0.020(5) 0.010(6) -0.019(5) 
C41 0.207(12) 0.158(11) 0.163(11) 0.015(8) -0.035(8) -0.037(8) 
O15 0.112(6) 0.068(5) 0.113(7) 0.014(5) -0.013(5) -0.006(4) 
C42 0.119(8) 0.109(8) 0.097(7) -0.013(6) -0.032(6) -0.023(6) 
O16 0.220(9) 0.198(9) 0.205(9) -0.095(7) -0.125(7) -0.013(7) 
 
_geom_special_details 
; 
 All esds (except the esd in the dihedral angle between two l.s. planes) 
 are estimated using the full covariance matrix.  The cell esds are taken 
 into account individually in the estimation of esds in distances, angles 
 and torsion angles; correlations between esds in cell parameters are only 
 used when they are defined by crystal symmetry.  An approximate (isotropic) 
 treatment of cell esds is used for estimating esds involving l.s. planes. 
; 
 
loop_ 
 _geom_bond_atom_site_label_1 
 _geom_bond_atom_site_label_2 
 _geom_bond_distance 
 _geom_bond_site_symmetry_2 
 _geom_bond_publ_flag 
Nd1 O3 2.317(4) 2_766 ? 
Nd1 O11 2.408(4) . ? 
Nd1 O2 2.415(4) 2_766 ? 
Nd1 O12 2.438(4) 2_766 ? 
Nd1 O12 2.442(4) . ? 
Nd1 O14 2.452(5) . ? 
Nd1 O8 2.547(4) . ? 
Nd1 N1 2.574(6) 2_766 ? 
Nd1 Nd2 3.8861(15) 2_766 ? 
Nd1 Nd1 4.0007(11) 2_766 ? 
Nd2 O7 2.338(5) . ? 
Nd2 O3 2.367(4) . ? 
Nd2 O4 2.399(4) . ? 
Nd2 O12 2.424(4) . ? 
Nd2 O8 2.445(4) . ? 
Nd2 O11 2.471(4) . ? 
Nd2 N2 2.550(7) . ? 
Nd2 N3 2.580(6) . ? 
Nd2 Nd1 3.8861(16) 2_766 ? 
Nd3 O9 2.237(4) . ? 
Nd3 O2 2.390(4) 2_766 ? 
Nd3 O4 2.418(4) . ? 
Nd3 O11 2.423(4) . ? 
Nd3 O13 2.453(5) . ? 
Nd3 O8 2.454(4) . ? 
Nd3 N4 2.525(5) . ? 
Nd3 O1 2.660(5) 2_766 ? 
O1 C2 1.388(8) . ? 
O1 C1 1.444(8) . ? 
O1 Nd3 2.660(5) 2_766 ? 
O2 C7 1.332(7) . ? 
O2 Nd3 2.390(4) 2_766 ? 
O2 Nd1 2.415(4) 2_766 ? 
O3 C10 1.334(10) . ? 
O3 Nd1 2.317(4) 2_766 ? 
O4 C18 1.350(7) . ? 
O5 C17 1.367(10) . ? 
O5 C19 1.417(10) . ? 
O6 C21 1.379(11) . ? 
O6 C20 1.451(10) . ? 
O7 C26 1.219(9) . ? 
O8 C29 1.425(7) . ? 
O9 C37 1.311(8) . ? 
O10 C36 1.385(9) . ? 
O10 C38 1.421(9) . ? 
O11 H11C 0.9800 . ? 
O12 Nd1 2.438(4) 2_766 ? 
O12 H12B 0.9800 . ? 
O13 C39 1.487(9) . ? 
O13 H13A 0.8200 . ? 
O14 C40 1.418(9) . ? 
O14 H14B 0.8200 . ? 
N1 C8 1.285(9) . ? 
N1 C9 1.465(9) . ? 
N1 Nd1 2.574(6) 2_766 ? 
N2 C12 1.297(10) . ? 
N2 C11 1.418(13) . ? 
N3 C27 1.274(9) . ? 
N3 C28 1.481(9) . ? 
N4 C31 1.275(8) . ? 
N4 C30 1.485(8) . ? 
C1 H1B 0.9600 . ? 
C1 H1C 0.9600 . ? 
C1 H1D 0.9600 . ? 
C2 C3 1.377(10) . ? 
C2 C7 1.407(9) . ? 
C3 C4 1.395(12) . ? 
C3 H3A 0.9300 . ? 
C4 C5 1.370(12) . ? 
C4 H4A 0.9300 . ? 
C5 C6 1.413(10) . ? 
C5 H5A 0.9300 . ? 
C6 C7 1.393(10) . ? 
C6 C8 1.456(10) . ? 
C8 H8A 0.9300 . ? 
C9 C10 1.472(12) . ? 
C9 H9A 0.9700 . ? 
C9 H9B 0.9700 . ? 
C10 C11 1.443(9) . ? 
C10 H10A 0.9800 . ? 
C11 H11A 0.9700 . ? 
C11 H11B 0.9700 . ? 
C12 C13 1.438(11) . ? 
C12 H12A 0.9300 . ? 
C13 C14 1.411(10) . ? 
C13 C18 1.413(10) . ? 
C14 C15 1.368(12) . ? 
C14 H14A 0.9300 . ? 
C15 C16 1.410(13) . ? 
C15 H15A 0.9300 . ? 
C16 C17 1.394(11) . ? 
C16 H16B 0.9300 . ? 
C17 C18 1.407(10) . ? 
C19 H19A 0.9600 . ? 
C19 H19B 0.9600 . ? 
C19 H19C 0.9600 . ? 
C20 H20A 0.9600 . ? 
C20 H20B 0.9600 . ? 
C20 H20C 0.9600 . ? 
C21 C22 1.385(11) . ? 
C21 C26 1.435(11) . ? 
C22 C23 1.375(14) . ? 
C22 H22A 0.9300 . ? 
C23 C24 1.379(13) . ? 
C23 H23A 0.9300 . ? 
C24 C25 1.414(11) . ? 
C24 H24A 0.9300 . ? 
C25 C26 1.467(12) . ? 
C25 C27 1.470(12) . ? 
C27 H27A 0.9300 . ? 
C28 C29 1.530(10) . ? 
C28 H28A 0.9700 . ? 
C28 H28B 0.9700 . ? 
C29 C30 1.534(9) . ? 
C29 H29A 0.9800 . ? 
C30 H30A 0.9700 . ? 
C30 H30B 0.9700 . ? 
C31 C32 1.439(9) . ? 
C31 H31A 0.9300 . ? 
C32 C33 1.409(9) . ? 
C32 C37 1.430(10) . ? 
C33 C34 1.374(11) . ? 
C33 H33A 0.9300 . ? 
C34 C35 1.392(12) . ? 
C34 H34A 0.9300 . ? 
C35 C36 1.382(10) . ? 
C35 H35A 0.9300 . ? 
C36 C37 1.425(9) . ? 
C38 H38A 0.9600 . ? 
C38 H38B 0.9600 . ? 
C38 H38C 0.9600 . ? 
C39 H39A 0.9600 . ? 
C39 H39B 0.9600 . ? 
C39 H39C 0.9600 . ? 
C40 H40A 0.9600 . ? 
C40 H40B 0.9600 . ? 
C40 H40C 0.9600 . ? 
C41 O15 1.592(19) . ? 
C41 H41A 0.9600 . ? 
C41 H41B 0.9600 . ? 
C41 H41C 0.9600 . ? 
O15 H15B 0.8200 . ? 
C42 O16 1.651(9) . ? 
C42 H42B 0.9600 . ? 
C42 H42C 0.9600 . ? 
C42 H42D 0.9600 . ? 
O16 H16A 0.8200 . ? 
 
loop_ 
 _geom_angle_atom_site_label_1 
 _geom_angle_atom_site_label_2 
 _geom_angle_atom_site_label_3 
 _geom_angle 
 _geom_angle_site_symmetry_1 
 _geom_angle_site_symmetry_3 
 _geom_angle_publ_flag 
O3 Nd1 O11 154.14(15) 2_766 . ? 
O3 Nd1 O2 130.30(16) 2_766 2_766 ? 
O11 Nd1 O2 72.99(14) . 2_766 ? 
O3 Nd1 O12 70.32(15) 2_766 2_766 ? 
O11 Nd1 O12 84.33(14) . 2_766 ? 
O2 Nd1 O12 139.14(15) 2_766 2_766 ? 
O3 Nd1 O12 85.81(16) 2_766 . ? 
O11 Nd1 O12 80.60(14) . . ? 
O2 Nd1 O12 135.61(14) 2_766 . ? 
O12 Nd1 O12 69.87(16) 2_766 . ? 
O3 Nd1 O14 81.61(18) 2_766 . ? 
O11 Nd1 O14 98.05(16) . . ? 
O2 Nd1 O14 73.10(16) 2_766 . ? 
O12 Nd1 O14 77.14(16) 2_766 . ? 
O12 Nd1 O14 146.97(16) . . ? 
O3 Nd1 O8 133.24(15) 2_766 . ? 
O11 Nd1 O8 61.14(14) . . ? 
O2 Nd1 O8 66.54(14) 2_766 . ? 
O12 Nd1 O8 129.91(14) 2_766 . ? 
O12 Nd1 O8 69.57(13) . . ? 
O14 Nd1 O8 138.36(15) . . ? 
O3 Nd1 N1 65.17(17) 2_766 2_766 ? 
O11 Nd1 N1 140.57(17) . 2_766 ? 
O2 Nd1 N1 69.11(17) 2_766 2_766 ? 
O12 Nd1 N1 132.65(16) 2_766 2_766 ? 
O12 Nd1 N1 120.50(17) . 2_766 ? 
O14 Nd1 N1 81.20(19) . 2_766 ? 
O8 Nd1 N1 93.41(17) . 2_766 ? 
O3 Nd1 Nd2 34.35(11) 2_766 2_766 ? 
O11 Nd1 Nd2 121.02(10) . 2_766 ? 
O2 Nd1 Nd2 143.13(11) 2_766 2_766 ? 
O12 Nd1 Nd2 36.81(10) 2_766 2_766 ? 
O12 Nd1 Nd2 81.19(10) . 2_766 ? 
O14 Nd1 Nd2 71.24(12) . 2_766 ? 
O8 Nd1 Nd2 150.13(9) . 2_766 ? 
N1 Nd1 Nd2 96.29(13) 2_766 2_766 ? 
O3 Nd1 Nd1 75.53(12) 2_766 2_766 ? 
O11 Nd1 Nd1 80.80(10) . 2_766 ? 
O2 Nd1 Nd1 153.78(11) 2_766 2_766 ? 
O12 Nd1 Nd1 34.97(10) 2_766 2_766 ? 
O12 Nd1 Nd1 34.90(10) . 2_766 ? 
O14 Nd1 Nd1 112.10(13) . 2_766 ? 
O8 Nd1 Nd1 100.25(10) . 2_766 ? 
N1 Nd1 Nd1 136.27(13) 2_766 2_766 ? 
Nd2 Nd1 Nd1 54.46(2) 2_766 2_766 ? 
O7 Nd2 O3 82.83(18) . . ? 
O7 Nd2 O4 120.68(17) . . ? 
O3 Nd2 O4 130.30(16) . . ? 
O7 Nd2 O12 89.57(17) . . ? 
O3 Nd2 O12 69.76(15) . . ? 
O4 Nd2 O12 142.83(14) . . ? 
O7 Nd2 O8 129.55(18) . . ? 
O3 Nd2 O8 128.39(15) . . ? 
O4 Nd2 O8 72.32(15) . . ? 
O12 Nd2 O8 71.58(14) . . ? 
O7 Nd2 O11 160.96(16) . . ? 
O3 Nd2 O11 78.72(16) . . ? 
O4 Nd2 O11 75.78(14) . . ? 
O12 Nd2 O11 79.70(13) . . ? 
O8 Nd2 O11 61.74(14) . . ? 
O7 Nd2 N2 88.6(3) . . ? 
O3 Nd2 N2 66.34(18) . . ? 
O4 Nd2 N2 70.97(19) . . ? 
O12 Nd2 N2 135.95(18) . . ? 
O8 Nd2 N2 137.2(2) . . ? 
O11 Nd2 N2 88.4(2) . . ? 
O7 Nd2 N3 70.48(19) . . ? 
O3 Nd2 N3 150.91(18) . . ? 
O4 Nd2 N3 75.45(17) . . ? 
O12 Nd2 N3 97.95(17) . . ? 
O8 Nd2 N3 66.70(16) . . ? 
O11 Nd2 N3 126.29(17) . . ? 
N2 Nd2 N3 122.5(2) . . ? 
O7 Nd2 Nd1 79.44(13) . 2_766 ? 
O3 Nd2 Nd1 33.54(10) . 2_766 ? 
O4 Nd2 Nd1 156.48(11) . 2_766 ? 
O12 Nd2 Nd1 37.06(10) . 2_766 ? 
O8 Nd2 Nd1 105.36(10) . 2_766 ? 
O11 Nd2 Nd1 82.57(10) . 2_766 ? 
N2 Nd2 Nd1 99.67(15) . 2_766 ? 
N3 Nd2 Nd1 126.00(14) . 2_766 ? 
O9 Nd3 O2 124.10(16) . 2_766 ? 
O9 Nd3 O4 94.04(17) . . ? 
O2 Nd3 O4 137.77(15) 2_766 . ? 
O9 Nd3 O11 157.45(15) . . ? 
O2 Nd3 O11 73.15(14) 2_766 . ? 
O4 Nd3 O11 76.31(14) . . ? 
O9 Nd3 O13 80.16(17) . . ? 
O2 Nd3 O13 115.28(17) 2_766 . ? 
O4 Nd3 O13 86.05(17) . . ? 
O11 Nd3 O13 78.89(15) . . ? 
O9 Nd3 O8 134.49(16) . . ? 
O2 Nd3 O8 68.42(14) 2_766 . ? 
O4 Nd3 O8 71.82(15) . . ? 
O11 Nd3 O8 62.28(14) . . ? 
O13 Nd3 O8 138.54(15) . . ? 
O9 Nd3 N4 72.77(17) . . ? 
O2 Nd3 N4 77.70(17) 2_766 . ? 
O4 Nd3 N4 100.18(17) . . ? 
O11 Nd3 N4 128.56(15) . . ? 
O13 Nd3 N4 152.54(17) . . ? 
O8 Nd3 N4 67.91(16) . . ? 
O9 Nd3 O1 72.92(17) . 2_766 ? 
O2 Nd3 O1 60.78(14) 2_766 2_766 ? 
O4 Nd3 O1 160.19(15) . 2_766 ? 
O11 Nd3 O1 110.13(15) . 2_766 ? 
O13 Nd3 O1 77.20(17) . 2_766 ? 
O8 Nd3 O1 127.94(14) . 2_766 ? 
N4 Nd3 O1 90.29(17) . 2_766 ? 
C2 O1 C1 116.6(5) . . ? 
C2 O1 Nd3 115.0(4) . 2_766 ? 
C1 O1 Nd3 125.0(4) . 2_766 ? 
C7 O2 Nd3 124.2(4) . 2_766 ? 
C7 O2 Nd1 134.3(4) . 2_766 ? 
Nd3 O2 Nd1 101.53(16) 2_766 2_766 ? 
C10 O3 Nd1 124.0(5) . 2_766 ? 
C10 O3 Nd2 122.3(5) . . ? 
Nd1 O3 Nd2 112.12(18) 2_766 . ? 
C18 O4 Nd2 130.2(4) . . ? 
C18 O4 Nd3 130.0(4) . . ? 
Nd2 O4 Nd3 97.66(15) . . ? 
C17 O5 C19 117.7(7) . . ? 
C21 O6 C20 118.2(8) . . ? 
C26 O7 Nd2 137.3(5) . . ? 
C29 O8 Nd2 120.9(4) . . ? 
C29 O8 Nd3 118.2(3) . . ? 
Nd2 O8 Nd3 95.47(15) . . ? 
C29 O8 Nd1 126.3(4) . . ? 
Nd2 O8 Nd1 92.62(14) . . ? 
Nd3 O8 Nd1 96.18(14) . . ? 
C37 O9 Nd3 141.5(4) . . ? 
C36 O10 C38 117.5(6) . . ? 
Nd1 O11 Nd3 100.79(15) . . ? 
Nd1 O11 Nd2 95.45(14) . . ? 
Nd3 O11 Nd2 95.60(15) . . ? 
Nd1 O11 H11C 119.9 . . ? 
Nd3 O11 H11C 119.9 . . ? 
Nd2 O11 H11C 119.9 . . ? 
Nd2 O12 Nd1 106.13(16) . 2_766 ? 
Nd2 O12 Nd1 95.78(14) . . ? 
Nd1 O12 Nd1 110.13(16) 2_766 . ? 
Nd2 O12 H12B 114.4 . . ? 
Nd1 O12 H12B 114.4 2_766 . ? 
Nd1 O12 H12B 114.4 . . ? 
C39 O13 Nd3 127.6(5) . . ? 
C39 O13 H13A 109.5 . . ? 
Nd3 O13 H13A 102.9 . . ? 
C40 O14 Nd1 131.5(5) . . ? 
C40 O14 H14B 109.5 . . ? 
Nd1 O14 H14B 100.0 . . ? 
C8 N1 C9 116.8(7) . . ? 
C8 N1 Nd1 128.6(5) . 2_766 ? 
C9 N1 Nd1 110.5(5) . 2_766 ? 
C12 N2 C11 111.8(8) . . ? 
C12 N2 Nd2 131.0(6) . . ? 
C11 N2 Nd2 116.6(5) . . ? 
C27 N3 C28 117.0(7) . . ? 
C27 N3 Nd2 128.6(6) . . ? 
C28 N3 Nd2 113.2(4) . . ? 
C31 N4 C30 117.9(6) . . ? 
C31 N4 Nd3 129.4(4) . . ? 
C30 N4 Nd3 112.6(4) . . ? 
O1 C1 H1B 109.5 . . ? 
O1 C1 H1C 109.5 . . ? 
H1B C1 H1C 109.5 . . ? 
O1 C1 H1D 109.5 . . ? 
H1B C1 H1D 109.5 . . ? 
H1C C1 H1D 109.5 . . ? 
C3 C2 O1 124.6(7) . . ? 
C3 C2 C7 122.2(7) . . ? 
O1 C2 C7 113.2(5) . . ? 
C2 C3 C4 118.1(8) . . ? 
C2 C3 H3A 121.0 . . ? 
C4 C3 H3A 121.0 . . ? 
C5 C4 C3 121.1(7) . . ? 
C5 C4 H4A 119.5 . . ? 
C3 C4 H4A 119.5 . . ? 
C4 C5 C6 121.1(8) . . ? 
C4 C5 H5A 119.5 . . ? 
C6 C5 H5A 119.5 . . ? 
C7 C6 C5 118.4(7) . . ? 
C7 C6 C8 123.8(6) . . ? 
C5 C6 C8 117.8(7) . . ? 
O2 C7 C6 123.6(6) . . ? 
O2 C7 C2 117.3(6) . . ? 
C6 C7 C2 119.1(6) . . ? 
N1 C8 C6 126.6(7) . . ? 
N1 C8 H8A 116.7 . . ? 
C6 C8 H8A 116.7 . . ? 
N1 C9 C10 106.9(7) . . ? 
N1 C9 H9A 110.3 . . ? 
C10 C9 H9A 110.3 . . ? 
N1 C9 H9B 110.3 . . ? 
C10 C9 H9B 110.3 . . ? 
H9A C9 H9B 108.6 . . ? 
O3 C10 C11 120.4(9) . . ? 
O3 C10 C9 117.8(7) . . ? 
C11 C10 C9 121.7(9) . . ? 
O3 C10 H10A 90.8 . . ? 
C11 C10 H10A 90.8 . . ? 
C9 C10 H10A 90.8 . . ? 
N2 C11 C10 113.6(9) . . ? 
N2 C11 H11A 108.9 . . ? 
C10 C11 H11A 108.9 . . ? 
N2 C11 H11B 108.9 . . ? 
C10 C11 H11B 108.9 . . ? 
H11A C11 H11B 107.7 . . ? 
N2 C12 C13 125.1(8) . . ? 
N2 C12 H12A 117.4 . . ? 
C13 C12 H12A 117.4 . . ? 
C14 C13 C18 119.8(7) . . ? 
C14 C13 C12 115.0(7) . . ? 
C18 C13 C12 125.2(6) . . ? 
C15 C14 C13 120.4(8) . . ? 
C15 C14 H14A 119.8 . . ? 
C13 C14 H14A 119.8 . . ? 
C14 C15 C16 120.4(7) . . ? 
C14 C15 H15A 119.8 . . ? 
C16 C15 H15A 119.8 . . ? 
C17 C16 C15 120.0(8) . . ? 
C17 C16 H16B 120.0 . . ? 
C15 C16 H16B 120.0 . . ? 
O5 C17 C16 124.8(7) . . ? 
O5 C17 C18 114.9(6) . . ? 
C16 C17 C18 120.3(8) . . ? 
O4 C18 C17 120.1(7) . . ? 
O4 C18 C13 120.9(6) . . ? 
C17 C18 C13 119.0(6) . . ? 
O5 C19 H19A 109.5 . . ? 
O5 C19 H19B 109.5 . . ? 
H19A C19 H19B 109.5 . . ? 
O5 C19 H19C 109.5 . . ? 
H19A C19 H19C 109.5 . . ? 
H19B C19 H19C 109.5 . . ? 
O6 C20 H20A 109.5 . . ? 
O6 C20 H20B 109.5 . . ? 
H20A C20 H20B 109.5 . . ? 
O6 C20 H20C 109.5 . . ? 
H20A C20 H20C 109.5 . . ? 
H20B C20 H20C 109.5 . . ? 
O6 C21 C22 125.8(9) . . ? 
O6 C21 C26 110.8(7) . . ? 
C22 C21 C26 123.3(9) . . ? 
C23 C22 C21 120.8(9) . . ? 
C23 C22 H22A 119.6 . . ? 
C21 C22 H22A 119.6 . . ? 
C22 C23 C24 120.5(8) . . ? 
C22 C23 H23A 119.7 . . ? 
C24 C23 H23A 119.7 . . ? 
C23 C24 C25 119.9(9) . . ? 
C23 C24 H24A 120.1 . . ? 
C25 C24 H24A 120.1 . . ? 
C24 C25 C26 122.0(8) . . ? 
C24 C25 C27 117.2(8) . . ? 
C26 C25 C27 120.8(7) . . ? 
O7 C26 C21 121.9(9) . . ? 
O7 C26 C25 124.8(7) . . ? 
C21 C26 C25 113.3(8) . . ? 
N3 C27 C25 127.3(8) . . ? 
N3 C27 H27A 116.4 . . ? 
C25 C27 H27A 116.4 . . ? 
N3 C28 C29 109.8(6) . . ? 
N3 C28 H28A 109.7 . . ? 
C29 C28 H28A 109.7 . . ? 
N3 C28 H28B 109.7 . . ? 
C29 C28 H28B 109.7 . . ? 
H28A C28 H28B 108.2 . . ? 
O8 C29 C28 110.0(5) . . ? 
O8 C29 C30 108.4(5) . . ? 
C28 C29 C30 110.9(6) . . ? 
O8 C29 H29A 109.2 . . ? 
C28 C29 H29A 109.2 . . ? 
C30 C29 H29A 109.2 . . ? 
N4 C30 C29 110.0(5) . . ? 
N4 C30 H30A 109.7 . . ? 
C29 C30 H30A 109.7 . . ? 
N4 C30 H30B 109.7 . . ? 
C29 C30 H30B 109.7 . . ? 
H30A C30 H30B 108.2 . . ? 
N4 C31 C32 128.3(6) . . ? 
N4 C31 H31A 115.9 . . ? 
C32 C31 H31A 115.9 . . ? 
C33 C32 C37 119.5(6) . . ? 
C33 C32 C31 117.5(7) . . ? 
C37 C32 C31 123.0(6) . . ? 
C34 C33 C32 121.7(8) . . ? 
C34 C33 H33A 119.1 . . ? 
C32 C33 H33A 119.1 . . ? 
C33 C34 C35 119.4(7) . . ? 
C33 C34 H34A 120.3 . . ? 
C35 C34 H34A 120.3 . . ? 
C36 C35 C34 120.8(7) . . ? 
C36 C35 H35A 119.6 . . ? 
C34 C35 H35A 119.6 . . ? 
C35 C36 O10 125.5(7) . . ? 
C35 C36 C37 121.3(7) . . ? 
O10 C36 C37 113.2(6) . . ? 
O9 C37 C36 120.4(7) . . ? 
O9 C37 C32 122.5(6) . . ? 
C36 C37 C32 117.1(6) . . ? 
O10 C38 H38A 109.5 . . ? 
O10 C38 H38B 109.5 . . ? 
H38A C38 H38B 109.5 . . ? 
O10 C38 H38C 109.5 . . ? 
H38A C38 H38C 109.5 . . ? 
H38B C38 H38C 109.5 . . ? 
O13 C39 H39A 109.5 . . ? 
O13 C39 H39B 109.5 . . ? 
H39A C39 H39B 109.5 . . ? 
O13 C39 H39C 109.5 . . ? 
H39A C39 H39C 109.5 . . ? 
H39B C39 H39C 109.5 . . ? 
O14 C40 H40A 109.5 . . ? 
O14 C40 H40B 109.5 . . ? 
H40A C40 H40B 109.5 . . ? 
O14 C40 H40C 109.5 . . ? 
H40A C40 H40C 109.5 . . ? 
H40B C40 H40C 109.5 . . ? 
O15 C41 H41A 109.5 . . ? 
O15 C41 H41B 109.5 . . ? 
H41A C41 H41B 109.5 . . ? 
O15 C41 H41C 109.5 . . ? 
H41A C41 H41C 109.5 . . ? 
H41B C41 H41C 109.5 . . ? 
C41 O15 H15B 109.5 . . ? 
O16 C42 H42B 109.5 . . ? 
O16 C42 H42C 109.5 . . ? 
H42B C42 H42C 109.5 . . ? 
O16 C42 H42D 109.5 . . ? 
H42B C42 H42D 109.5 . . ? 
H42C C42 H42D 109.5 . . ? 
C42 O16 H16A 109.5 . . ? 
 
_diffrn_measured_fraction_theta_max    0.997 
_diffrn_reflns_theta_full              25.00 
_diffrn_measured_fraction_theta_full   0.997 
_refine_diff_density_max    2.204 
_refine_diff_density_min   -1.207 
_refine_diff_density_rms    0.130 

#===END

data_complex-2 
 
_audit_creation_method            SHELXL-97 
_chemical_name_systematic 
; 
 ? 
; 
_chemical_name_common             ? 
_chemical_melting_point           ?
_chemical_formula_moiety
 'C80 H96 N8 O28 Tb6, 4(C H4 O), 2(Cl)'
_chemical_formula_sum 
 'C84 H112 Cl2 N8 O32 Tb6' 
_chemical_formula_weight          2770.24 
 
loop_ 
 _atom_type_symbol 
 _atom_type_description 
 _atom_type_scat_dispersion_real 
 _atom_type_scat_dispersion_imag 
 _atom_type_scat_source 
 'C'  'C'   0.0033   0.0016 
 'International Tables Vol C Tables 4.2.6.8 and 6.1.1.4' 
 'H'  'H'   0.0000   0.0000 
 'International Tables Vol C Tables 4.2.6.8 and 6.1.1.4' 
 'N'  'N'   0.0061   0.0033 
 'International Tables Vol C Tables 4.2.6.8 and 6.1.1.4' 
 'O'  'O'   0.0106   0.0060 
 'International Tables Vol C Tables 4.2.6.8 and 6.1.1.4' 
 'Tb'  'Tb'  -0.1723   4.1537 
 'International Tables Vol C Tables 4.2.6.8 and 6.1.1.4' 
 'Cl'  'Cl'   0.1484   0.1585 
 'International Tables Vol C Tables 4.2.6.8 and 6.1.1.4' 
 
_symmetry_cell_setting            Triclinic 
_symmetry_space_group_name_H-M    P-1 
 
loop_ 
 _symmetry_equiv_pos_as_xyz 
 'x, y, z' 
 '-x, -y, -z' 
 
_cell_length_a                    12.498(3) 
_cell_length_b                    14.737(3) 
_cell_length_c                    15.623(4) 
_cell_angle_alpha                 79.18(3) 
_cell_angle_beta                  68.23(2) 
_cell_angle_gamma                 69.44(3) 
_cell_volume                      2496.7(11) 
_cell_formula_units_Z             1 
_cell_measurement_temperature     223(1) 
_cell_measurement_reflns_used     6516 
_cell_measurement_theta_min       1.7566 
_cell_measurement_theta_max       31.8691 
 
_exptl_crystal_description        Block 
_exptl_crystal_colour             Yellow 
_exptl_crystal_size_max           0.17 
_exptl_crystal_size_mid           0.16 
_exptl_crystal_size_min           0.12 
_exptl_crystal_density_meas       ? 
_exptl_crystal_density_diffrn     1.842 
_exptl_crystal_density_method     'not measured' 
_exptl_crystal_F_000              1352 
_exptl_absorpt_coefficient_mu     4.325 
_exptl_absorpt_correction_type    'Multi-scan' 
_exptl_absorpt_correction_T_min   0.7046 
_exptl_absorpt_correction_T_max   1.0000 
_exptl_absorpt_process_details    
'DENZO and Scalepack (Otwinoski and Minor, 1997)'
 
_exptl_special_details 
; 
 ? 
; 
 
_diffrn_ambient_temperature       223(1) 
_diffrn_radiation_wavelength      0.710747 
_diffrn_radiation_type            MoK\a 
_diffrn_radiation_source          'Sealed tube' 
_diffrn_radiation_monochromator   'Graphite Monochromator' 
_diffrn_measurement_device_type   'Mercury2 (2x2 bin mode)' 
_diffrn_measurement_method        'dtprofit.ref' 
_diffrn_detector_area_resol_mean  13.6612 
_diffrn_standards_number          ? 
_diffrn_standards_interval_count  ? 
_diffrn_standards_interval_time   ? 
_diffrn_standards_decay_%         ? 
_diffrn_reflns_number             18375 
_diffrn_reflns_av_R_equivalents   0.0411 
_diffrn_reflns_av_sigmaI/netI     0.0563 
_diffrn_reflns_limit_h_min        -13 
_diffrn_reflns_limit_h_max        14 
_diffrn_reflns_limit_k_min        -17 
_diffrn_reflns_limit_k_max        17 
_diffrn_reflns_limit_l_min        -18 
_diffrn_reflns_limit_l_max        18 
_diffrn_reflns_theta_min          3.09 
_diffrn_reflns_theta_max          25.00 
_reflns_number_total              8746 
_reflns_number_gt                 7710 
_reflns_threshold_expression      >2sigma(I) 
 
_publ_section_acknowledgements
;
The data were collected using instrumentation purchased with funds provided
by the National Science Foundation Grant No. 0741973.
;

_publ_section_references
;
Altomare A., Burla M.C., Camalli M., Cascarano G.L., Giacovazzo C., 
Guagliardi A., Moliterni A.G.G., Polidori G.,Spagna R. Sir97.  
(1999) J. Appl. Cryst. 32, 115-119.

Otwinowski, Z. and Minor, W.  (1997).  Methods in Enzymology,
276, Macromolecular Crystallography, part A, 307-326, C. W. Carter,
Jr. and R. M. Sweets, Eds., Academic Press.

Sheldrick, G. M.  (1998).  SHELXTL/PC.  Release 5.10.  Siemens 
Analytical X-ray Instruments, Inc., Madison, WI, USA.


;
_computing_data_collection        'Collect software, Nonius B.V. 1998'
_computing_cell_refinement        'Collect software, Nonius B.V. 1998'
_computing_data_reduction         
;
DENZO and Scalepack (Otwinoski and Minor, 1997)
;
_computing_structure_solution     
;

SIR97 - Altomare A., Burla M.C., Camalli M., Cascarano G.L., Giacovazzo C., 
Guagliardi A., Moliterni A.G.G., Polidori G.,Spagna R.
;
_computing_structure_refinement   'XL SHELXTL/PC, Siemens Analytical'
_computing_molecular_graphics     'XP SHELXTL/PC, Siemens Analytical' 
_computing_publication_material   ? 


  
_refine_special_details 
; 
 Refinement of F^2^ against ALL reflections.  The weighted R-factor wR and 
 goodness of fit S are based on F^2^, conventional R-factors R are based 
 on F, with F set to zero for negative F^2^. The threshold expression of 
 F^2^ > 2sigma(F^2^) is used only for calculating R-factors(gt) etc. and is 
 not relevant to the choice of reflections for refinement.  R-factors based 
 on F^2^ are statistically about twice as large as those based on F, and R- 
 factors based on ALL data will be even larger. 

 Restraints 26: The bond lengths of the uncoordinate MeOH are fixed; ISOR was 
 applied to uncoordinate MeOH atoms to allow their Uij components approximate
 to isotropic behavior.

;
 
_refine_ls_structure_factor_coef  Fsqd  
_refine_ls_matrix_type            full 
_refine_ls_weighting_scheme       calc  
_refine_ls_weighting_details 
 'calc w=1/[\s^2^(Fo^2^)+(0.0427P)^2^+12.9810P] where P=(Fo^2^+2Fc^2^)/3' 
_atom_sites_solution_primary      direct 
_atom_sites_solution_secondary    difmap 
_atom_sites_solution_hydrogens    geom 
_refine_ls_hydrogen_treatment     constr 
_refine_ls_extinction_method      none 
_refine_ls_extinction_coef        ? 
_refine_ls_number_reflns          8746 
_refine_ls_number_parameters      595 
_refine_ls_number_restraints      26 
_refine_ls_R_factor_all           0.0470 
_refine_ls_R_factor_gt            0.0407 
_refine_ls_wR_factor_ref          0.1036 
_refine_ls_wR_factor_gt           0.0997 
_refine_ls_goodness_of_fit_ref    1.046 
_refine_ls_restrained_S_all       1.069 
_refine_ls_shift/su_max           0.001 
_refine_ls_shift/su_mean          0.000 
 
loop_ 
 _atom_site_label 
 _atom_site_type_symbol 
 _atom_site_fract_x 
 _atom_site_fract_y 
 _atom_site_fract_z 
 _atom_site_U_iso_or_equiv 
 _atom_site_adp_type 
 _atom_site_occupancy 
 _atom_site_symmetry_multiplicity 
 _atom_site_calc_flag 
 _atom_site_refinement_flags 
 _atom_site_disorder_assembly 
 _atom_site_disorder_group 
Tb1 Tb 0.88906(3) 0.43267(2) 0.49754(2) 0.01886(10) Uani 1 1 d . . . 
Tb2 Tb 0.94504(3) 0.42114(2) 0.70725(2) 0.01993(10) Uani 1 1 d . . . 
Tb3 Tb 0.84258(3) 0.23558(2) 0.67669(2) 0.01941(10) Uani 1 1 d . . . 
Cl1 Cl 0.25247(18) 0.13894(13) 0.51454(13) 0.0348(4) Uani 1 1 d . . . 
O1 O 1.1725(5) 0.8799(3) 0.4254(3) 0.0286(11) Uani 1 1 d . . . 
O2 O 1.1943(4) 0.6989(3) 0.4633(3) 0.0223(10) Uani 1 1 d . . . 
O3 O 1.1314(4) 0.4388(3) 0.6091(3) 0.0266(11) Uani 1 1 d . . . 
O4 O 0.8855(5) 0.2852(3) 0.7935(3) 0.0253(11) Uani 1 1 d . . . 
O5 O 0.7010(5) 0.2495(4) 0.9347(3) 0.0401(13) Uani 1 1 d . . . 
O6 O 1.0909(7) 0.6013(5) 0.8329(4) 0.0577(17) Uani 1 1 d . . . 
O7 O 0.9590(5) 0.5347(4) 0.7875(4) 0.0444(15) Uani 1 1 d . . . 
O8 O 0.7813(4) 0.4109(3) 0.6675(3) 0.0199(9) Uani 1 1 d . . . 
O9 O 0.7693(4) 0.1222(3) 0.7729(3) 0.0272(11) Uani 1 1 d . . . 
O10 O 0.7873(5) -0.0576(4) 0.8413(4) 0.0402(13) Uani 1 1 d . . . 
O11 O 0.9940(4) 0.3134(3) 0.5884(3) 0.0180(9) Uani 1 1 d . . . 
H11C H 1.0781 0.2742 0.5595 0.022 Uiso 1 1 calc R . . 
O12 O 0.9181(4) 0.5387(3) 0.5822(3) 0.0185(9) Uani 1 1 d . . . 
H12B H 0.8494 0.5977 0.6005 0.022 Uiso 1 1 calc R . . 
O13 O 1.0260(5) 0.1008(3) 0.6599(3) 0.0322(12) Uani 1 1 d . . . 
H13A H 1.0775 0.1286 0.6446 0.039 Uiso 1 1 calc R . . 
O14 O 0.9660(5) 0.3451(4) 0.3610(3) 0.0345(12) Uani 1 1 d . . . 
H14B H 1.0133 0.3737 0.3265 0.041 Uiso 1 1 calc R . . 
N1 N 1.3087(5) 0.5180(4) 0.5396(4) 0.0253(13) Uani 1 1 d . . . 
N2 N 1.1249(6) 0.2958(5) 0.7463(5) 0.0447(18) Uani 1 1 d . . . 
N3 N 0.7381(6) 0.4938(4) 0.8257(4) 0.0334(15) Uani 1 1 d . . . 
N4 N 0.6187(5) 0.3077(4) 0.7320(4) 0.0213(12) Uani 1 1 d . . . 
C1 C 1.1530(8) 0.9828(5) 0.4058(6) 0.0387(19) Uani 1 1 d . . . 
H1B H 1.1045 1.0074 0.3662 0.058 Uiso 1 1 calc R . . 
H1C H 1.2297 0.9946 0.3756 0.058 Uiso 1 1 calc R . . 
H1D H 1.1120 1.0149 0.4625 0.058 Uiso 1 1 calc R . . 
C2 C 1.2436(6) 0.8321(5) 0.4806(5) 0.0254(15) Uani 1 1 d . . . 
C3 C 1.2974(8) 0.8754(6) 0.5155(5) 0.0376(19) Uani 1 1 d . . . 
H3A H 1.2871 0.9416 0.5040 0.045 Uiso 1 1 calc R . . 
C4 C 1.3684(9) 0.8178(6) 0.5691(7) 0.051(2) Uani 1 1 d . . . 
H4A H 1.4066 0.8458 0.5929 0.062 Uiso 1 1 calc R . . 
C5 C 1.3821(8) 0.7198(6) 0.5868(6) 0.041(2) Uani 1 1 d . . . 
H5A H 1.4289 0.6825 0.6229 0.050 Uiso 1 1 calc R . . 
C6 C 1.3255(7) 0.6753(5) 0.5506(5) 0.0268(15) Uani 1 1 d . . . 
C7 C 1.2535(6) 0.7320(5) 0.4978(4) 0.0228(14) Uani 1 1 d . . . 
C8 C 1.3508(7) 0.5712(5) 0.5669(5) 0.0295(16) Uani 1 1 d . . . 
H8A H 1.4028 0.5394 0.6005 0.035 Uiso 1 1 calc R . . 
C9 C 1.3436(7) 0.4140(5) 0.5667(6) 0.0377(19) Uani 1 1 d . . . 
H9A H 1.4101 0.3958 0.5907 0.045 Uiso 1 1 calc R . . 
H9B H 1.3678 0.3758 0.5145 0.045 Uiso 1 1 calc R . . 
C10 C 1.2313(9) 0.3991(7) 0.6404(8) 0.071(4) Uani 1 1 d D . . 
H10A H 1.2145 0.4371 0.6917 0.085 Uiso 1 1 calc R . . 
C11 C 1.2432(9) 0.2968(7) 0.6795(8) 0.071(3) Uani 1 1 d D . . 
H11A H 1.2671 0.2543 0.6307 0.086 Uiso 1 1 calc R . . 
H11B H 1.3041 0.2746 0.7096 0.086 Uiso 1 1 calc R . . 
C12 C 1.1276(8) 0.2244(6) 0.8071(5) 0.0386(19) Uani 1 1 d . . . 
H12A H 1.2038 0.1842 0.8077 0.046 Uiso 1 1 calc R . . 
C13 C 1.0247(7) 0.1997(5) 0.8749(4) 0.0257(15) Uani 1 1 d . . . 
C14 C 1.0470(8) 0.1376(6) 0.9522(5) 0.039(2) Uani 1 1 d . . . 
H14A H 1.1254 0.1119 0.9545 0.047 Uiso 1 1 calc R . . 
C15 C 0.9543(9) 0.1160(6) 1.0224(6) 0.044(2) Uani 1 1 d . . . 
H15A H 0.9694 0.0770 1.0734 0.053 Uiso 1 1 calc R . . 
C16 C 0.8368(9) 0.1514(6) 1.0195(5) 0.041(2) Uani 1 1 d . . . 
H16B H 0.7738 0.1360 1.0680 0.049 Uiso 1 1 calc R . . 
C17 C 0.8144(8) 0.2102(5) 0.9429(5) 0.0344(18) Uani 1 1 d . . . 
C18 C 0.9082(7) 0.2335(5) 0.8680(4) 0.0266(16) Uani 1 1 d . . . 
C19 C 0.6036(10) 0.2235(8) 1.0045(6) 0.057(3) Uani 1 1 d . . . 
H19A H 0.5308 0.2540 0.9892 0.086 Uiso 1 1 calc R . . 
H19B H 0.5929 0.2446 1.0625 0.086 Uiso 1 1 calc R . . 
H19C H 0.6212 0.1543 1.0093 0.086 Uiso 1 1 calc R . . 
C20 C 1.1656(11) 0.6421(8) 0.8577(9) 0.077(3) Uani 1 1 d . . . 
H20A H 1.2392 0.6391 0.8068 0.115 Uiso 1 1 calc R . . 
H20B H 1.1848 0.6056 0.9106 0.115 Uiso 1 1 calc R . . 
H20C H 1.1221 0.7086 0.8718 0.115 Uiso 1 1 calc R . . 
C21 C 0.9806(9) 0.6005(6) 0.8982(6) 0.045(2) Uani 1 1 d . . . 
C22 C 0.9370(10) 0.6293(6) 0.9872(6) 0.051(2) Uani 1 1 d . . . 
H22A H 0.9847 0.6503 1.0078 0.061 Uiso 1 1 calc R . . 
C23 C 0.8239(10) 0.6274(6) 1.0458(6) 0.050(2) Uani 1 1 d . . . 
H23A H 0.7975 0.6448 1.1061 0.060 Uiso 1 1 calc R . . 
C24 C 0.7494(10) 0.6002(6) 1.0165(6) 0.050(2) Uani 1 1 d . . . 
H24A H 0.6708 0.6038 1.0549 0.060 Uiso 1 1 calc R . . 
C25 C 0.7950(9) 0.5661(6) 0.9257(6) 0.045(2) Uani 1 1 d . . . 
C26 C 0.9169(10) 0.5630(6) 0.8605(7) 0.050(3) Uani 1 1 d . . . 
C27 C 0.7140(9) 0.5341(6) 0.9003(6) 0.046(2) Uani 1 1 d . . . 
H27A H 0.6360 0.5437 0.9423 0.055 Uiso 1 1 calc R . . 
C28 C 0.6428(7) 0.4639(5) 0.8161(5) 0.0333(17) Uani 1 1 d . . . 
H28A H 0.5642 0.5086 0.8463 0.040 Uiso 1 1 calc R . . 
H28B H 0.6456 0.3997 0.8463 0.040 Uiso 1 1 calc R . . 
C29 C 0.6585(6) 0.4623(5) 0.7156(5) 0.0261(15) Uani 1 1 d . . . 
H29A H 0.6387 0.5291 0.6884 0.031 Uiso 1 1 calc R . . 
C30 C 0.5756(7) 0.4116(5) 0.7053(5) 0.0270(15) Uani 1 1 d . . . 
H30A H 0.4929 0.4399 0.7445 0.032 Uiso 1 1 calc R . . 
H30B H 0.5771 0.4203 0.6418 0.032 Uiso 1 1 calc R . . 
C31 C 0.5351(7) 0.2674(5) 0.7788(5) 0.0266(15) Uani 1 1 d . . . 
H31A H 0.4551 0.3070 0.7918 0.032 Uiso 1 1 calc R . . 
C32 C 0.5552(7) 0.1657(5) 0.8130(4) 0.0272(16) Uani 1 1 d . . . 
C33 C 0.4500(8) 0.1354(6) 0.8551(5) 0.0336(17) Uani 1 1 d . . . 
H33A H 0.3745 0.1804 0.8594 0.040 Uiso 1 1 calc R . . 
C34 C 0.4567(8) 0.0429(6) 0.8892(5) 0.0364(18) Uani 1 1 d . . . 
H34A H 0.3868 0.0244 0.9157 0.044 Uiso 1 1 calc R . . 
C35 C 0.5691(8) -0.0243(6) 0.8842(5) 0.0381(19) Uani 1 1 d . . . 
H35A H 0.5744 -0.0884 0.9063 0.046 Uiso 1 1 calc R . . 
C36 C 0.6724(7) 0.0029(5) 0.8471(5) 0.0309(17) Uani 1 1 d . . . 
C37 C 0.6699(6) 0.0993(5) 0.8081(4) 0.0232(15) Uani 1 1 d . . . 
C38 C 0.7977(8) -0.1520(5) 0.8865(6) 0.044(2) Uani 1 1 d . . . 
H38A H 0.8815 -0.1871 0.8774 0.066 Uiso 1 1 calc R . . 
H38B H 0.7645 -0.1861 0.8613 0.066 Uiso 1 1 calc R . . 
H38C H 0.7541 -0.1465 0.9514 0.066 Uiso 1 1 calc R . . 
C39 C 1.0531(8) 0.0197(6) 0.7243(6) 0.050(2) Uani 1 1 d . . . 
H39A H 1.1337 -0.0224 0.6972 0.075 Uiso 1 1 calc R . . 
H39B H 0.9963 -0.0156 0.7387 0.075 Uiso 1 1 calc R . . 
H39C H 1.0473 0.0428 0.7798 0.075 Uiso 1 1 calc R . . 
C40 C 1.0154(10) 0.2446(6) 0.3447(7) 0.062(3) Uani 1 1 d . . . 
H40A H 1.0358 0.2369 0.2803 0.093 Uiso 1 1 calc R . . 
H40B H 0.9568 0.2121 0.3807 0.093 Uiso 1 1 calc R . . 
H40C H 1.0869 0.2170 0.3620 0.093 Uiso 1 1 calc R . . 
C41 C 0.6241(14) 0.7390(9) 0.7107(9) 0.119(5) Uani 1 1 d U . . 
H41A H 0.6720 0.7169 0.7509 0.179 Uiso 1 1 calc R . . 
H41B H 0.5498 0.7233 0.7398 0.179 Uiso 1 1 calc R . . 
H41C H 0.6064 0.8081 0.6986 0.179 Uiso 1 1 calc R . . 
O15 O 0.6929(6) 0.6906(4) 0.6220(4) 0.0571(17) Uani 1 1 d U . . 
H15B H 0.6988 0.7319 0.5788 0.086 Uiso 1 1 calc R . . 
C42 C 0.4679(9) 0.0284(7) 0.6484(6) 0.056(2) Uani 1 1 d DU . . 
H42B H 0.4256 0.0961 0.6404 0.084 Uiso 1 1 calc R . . 
H42C H 0.4940 -0.0019 0.5918 0.084 Uiso 1 1 calc R . . 
H42D H 0.5372 0.0218 0.6649 0.084 Uiso 1 1 calc R . . 
O16 O 0.3768(9) -0.0241(7) 0.7311(7) 0.140(4) Uani 1 1 d DU . . 
H16A H 0.3499 0.0048 0.7783 0.210 Uiso 1 1 calc R . . 
 
loop_ 
 _atom_site_aniso_label 
 _atom_site_aniso_U_11 
 _atom_site_aniso_U_22 
 _atom_site_aniso_U_33 
 _atom_site_aniso_U_23 
 _atom_site_aniso_U_13 
 _atom_site_aniso_U_12 
Tb1 0.0223(2) 0.01746(16) 0.01799(17) 0.00227(11) -0.00686(13) -0.00899(13) 
Tb2 0.0260(2) 0.01826(17) 0.01670(17) 0.00038(11) -0.00615(13) -0.00995(13) 
Tb3 0.0210(2) 0.01737(16) 0.02036(17) 0.00285(11) -0.00649(13) -0.00897(13) 
Cl1 0.0340(11) 0.0255(9) 0.0385(10) -0.0062(7) -0.0036(8) -0.0086(8) 
O1 0.039(3) 0.024(2) 0.032(3) 0.0050(19) -0.018(2) -0.017(2) 
O2 0.030(3) 0.024(2) 0.021(2) 0.0035(18) -0.011(2) -0.017(2) 
O3 0.022(3) 0.022(2) 0.030(3) 0.0114(19) -0.010(2) -0.005(2) 
O4 0.036(3) 0.027(2) 0.016(2) 0.0043(18) -0.011(2) -0.014(2) 
O5 0.046(4) 0.042(3) 0.026(3) 0.012(2) -0.003(2) -0.023(3) 
O6 0.075(5) 0.060(4) 0.051(4) -0.013(3) -0.020(4) -0.032(4) 
O7 0.045(4) 0.028(3) 0.046(4) -0.009(2) 0.013(3) -0.021(3) 
O8 0.022(3) 0.020(2) 0.018(2) 0.0006(17) -0.0057(19) -0.0080(19) 
O9 0.030(3) 0.026(3) 0.028(3) 0.0095(19) -0.010(2) -0.016(2) 
O10 0.041(4) 0.028(3) 0.045(3) 0.016(2) -0.011(3) -0.017(3) 
O11 0.022(3) 0.014(2) 0.017(2) -0.0015(16) -0.0054(19) -0.0053(18) 
O12 0.022(3) 0.014(2) 0.018(2) 0.0032(16) -0.0050(19) -0.0080(18) 
O13 0.027(3) 0.019(2) 0.045(3) 0.006(2) -0.010(2) -0.008(2) 
O14 0.045(4) 0.032(3) 0.028(3) -0.006(2) 0.000(2) -0.024(3) 
N1 0.022(3) 0.024(3) 0.026(3) 0.005(2) -0.009(3) -0.006(2) 
N2 0.037(4) 0.061(5) 0.039(4) 0.029(3) -0.021(3) -0.026(4) 
N3 0.034(4) 0.036(4) 0.026(3) -0.009(3) 0.000(3) -0.013(3) 
N4 0.020(3) 0.017(3) 0.027(3) 0.003(2) -0.007(2) -0.008(2) 
C1 0.060(6) 0.020(4) 0.045(5) 0.003(3) -0.024(4) -0.017(4) 
C2 0.025(4) 0.031(4) 0.023(4) -0.003(3) -0.003(3) -0.016(3) 
C3 0.045(5) 0.037(4) 0.041(5) -0.008(3) -0.015(4) -0.021(4) 
C4 0.055(6) 0.048(5) 0.076(7) -0.012(4) -0.042(5) -0.020(5) 
C5 0.037(5) 0.055(5) 0.048(5) -0.007(4) -0.030(4) -0.015(4) 
C6 0.024(4) 0.029(4) 0.029(4) -0.001(3) -0.009(3) -0.010(3) 
C7 0.022(4) 0.035(4) 0.013(3) -0.003(3) -0.001(3) -0.015(3) 
C8 0.026(4) 0.042(4) 0.024(4) 0.004(3) -0.012(3) -0.014(3) 
C9 0.032(5) 0.022(4) 0.054(5) 0.014(3) -0.018(4) -0.005(3) 
C10 0.036(6) 0.072(7) 0.083(8) 0.058(6) -0.026(5) -0.017(5) 
C11 0.049(7) 0.093(8) 0.070(7) 0.041(6) -0.033(6) -0.028(6) 
C12 0.042(5) 0.045(5) 0.035(4) 0.010(3) -0.029(4) -0.010(4) 
C13 0.041(5) 0.021(3) 0.018(3) 0.003(3) -0.012(3) -0.014(3) 
C14 0.058(6) 0.035(4) 0.034(4) 0.009(3) -0.028(4) -0.017(4) 
C15 0.078(7) 0.035(4) 0.031(4) 0.016(3) -0.031(5) -0.027(4) 
C16 0.069(7) 0.038(4) 0.023(4) 0.009(3) -0.012(4) -0.034(4) 
C17 0.052(6) 0.029(4) 0.027(4) 0.007(3) -0.015(4) -0.021(4) 
C18 0.038(5) 0.019(3) 0.020(4) 0.001(3) -0.007(3) -0.010(3) 
C19 0.063(7) 0.071(7) 0.032(5) 0.012(4) -0.006(4) -0.034(5) 
C20 0.090(9) 0.071(7) 0.098(9) -0.017(6) -0.040(7) -0.043(7) 
C21 0.059(6) 0.037(5) 0.036(5) -0.004(3) -0.016(4) -0.010(4) 
C22 0.078(8) 0.035(5) 0.044(5) -0.008(4) -0.033(5) -0.007(5) 
C23 0.072(7) 0.046(5) 0.023(4) -0.007(3) -0.009(4) -0.014(5) 
C24 0.073(7) 0.042(5) 0.028(4) -0.010(3) -0.012(4) -0.011(5) 
C25 0.072(7) 0.034(4) 0.031(4) 0.003(3) -0.020(4) -0.017(4) 
C26 0.080(8) 0.031(4) 0.069(7) 0.021(4) -0.055(6) -0.033(5) 
C27 0.057(6) 0.039(5) 0.032(4) -0.004(3) -0.006(4) -0.012(4) 
C28 0.030(5) 0.030(4) 0.034(4) -0.004(3) -0.002(3) -0.010(3) 
C29 0.024(4) 0.016(3) 0.027(4) -0.001(3) -0.003(3) 0.000(3) 
C30 0.024(4) 0.024(4) 0.026(4) 0.007(3) -0.005(3) -0.007(3) 
C31 0.024(4) 0.032(4) 0.022(4) 0.001(3) -0.006(3) -0.010(3) 
C32 0.034(5) 0.032(4) 0.020(3) 0.009(3) -0.008(3) -0.021(3) 
C33 0.035(5) 0.038(4) 0.030(4) 0.005(3) -0.008(3) -0.020(4) 
C34 0.035(5) 0.043(5) 0.033(4) 0.011(3) -0.005(3) -0.028(4) 
C35 0.052(6) 0.036(4) 0.030(4) 0.011(3) -0.012(4) -0.028(4) 
C36 0.036(5) 0.030(4) 0.028(4) 0.005(3) -0.009(3) -0.016(3) 
C37 0.028(4) 0.022(3) 0.021(3) 0.004(3) -0.005(3) -0.014(3) 
C38 0.050(6) 0.025(4) 0.049(5) 0.015(3) -0.014(4) -0.013(4) 
C39 0.038(5) 0.036(5) 0.062(6) 0.020(4) -0.019(4) -0.004(4) 
C40 0.063(7) 0.036(5) 0.062(6) -0.022(4) 0.017(5) -0.017(5) 
C41 0.119(9) 0.070(7) 0.090(7) 0.032(6) 0.009(6) -0.001(6) 
O15 0.048(4) 0.037(3) 0.057(4) 0.006(3) -0.005(3) 0.003(3) 
C42 0.046(5) 0.065(5) 0.047(5) -0.001(4) -0.005(4) -0.019(4) 
O16 0.155(8) 0.130(7) 0.168(8) -0.092(6) -0.119(6) 0.028(6) 
 
_geom_special_details 
; 
 All esds (except the esd in the dihedral angle between two l.s. planes) 
 are estimated using the full covariance matrix.  The cell esds are taken 
 into account individually in the estimation of esds in distances, angles 
 and torsion angles; correlations between esds in cell parameters are only 
 used when they are defined by crystal symmetry.  An approximate (isotropic) 
 treatment of cell esds is used for estimating esds involving l.s. planes. 
; 
 
loop_ 
 _geom_bond_atom_site_label_1 
 _geom_bond_atom_site_label_2 
 _geom_bond_distance 
 _geom_bond_site_symmetry_2 
 _geom_bond_publ_flag 
Tb1 O3 2.285(4) 2_766 ? 
Tb1 O11 2.377(4) . ? 
Tb1 O2 2.392(4) 2_766 ? 
Tb1 O14 2.405(5) . ? 
Tb1 O12 2.414(4) 2_766 ? 
Tb1 O12 2.419(4) . ? 
Tb1 O8 2.509(4) . ? 
Tb1 N1 2.572(6) 2_766 ? 
Tb1 Tb2 3.8479(15) 2_766 ? 
Tb1 Tb1 3.9643(11) 2_766 ? 
Tb2 O3 2.339(5) . ? 
Tb2 O7 2.358(6) . ? 
Tb2 O4 2.382(4) . ? 
Tb2 O12 2.396(4) . ? 
Tb2 O8 2.407(4) . ? 
Tb2 O11 2.435(4) . ? 
Tb2 N3 2.551(6) . ? 
Tb2 N2 2.553(7) . ? 
Tb2 Tb1 3.8479(15) 2_766 ? 
Tb3 O9 2.236(4) . ? 
Tb3 O2 2.360(4) 2_766 ? 
Tb3 O4 2.379(4) . ? 
Tb3 O11 2.407(4) . ? 
Tb3 O13 2.413(5) . ? 
Tb3 O8 2.416(4) . ? 
Tb3 N4 2.483(6) . ? 
Tb3 O1 2.635(5) 2_766 ? 
O1 C2 1.389(8) . ? 
O1 C1 1.440(8) . ? 
O1 Tb3 2.635(5) 2_766 ? 
O2 C7 1.314(8) . ? 
O2 Tb3 2.360(4) 2_766 ? 
O2 Tb1 2.392(4) 2_766 ? 
O3 C10 1.404(10) . ? 
O3 Tb1 2.285(4) 2_766 ? 
O4 C18 1.332(8) . ? 
O5 C17 1.375(10) . ? 
O5 C19 1.415(10) . ? 
O6 C21 1.380(11) . ? 
O6 C20 1.461(11) . ? 
O7 C26 1.154(11) . ? 
O8 C29 1.427(8) . ? 
O9 C37 1.296(8) . ? 
O10 C36 1.379(9) . ? 
O10 C38 1.422(8) . ? 
O11 H11C 0.9800 . ? 
O12 Tb1 2.414(4) 2_766 ? 
O12 H12B 0.9800 . ? 
O13 C39 1.439(9) . ? 
O13 H13A 0.8200 . ? 
O14 C40 1.422(9) . ? 
O14 H14B 0.8200 . ? 
N1 C8 1.287(9) . ? 
N1 C9 1.464(9) . ? 
N1 Tb1 2.572(6) 2_766 ? 
N2 C12 1.278(10) . ? 
N2 C11 1.463(12) . ? 
N3 C27 1.295(10) . ? 
N3 C28 1.470(10) . ? 
N4 C31 1.299(9) . ? 
N4 C30 1.469(8) . ? 
C1 H1B 0.9600 . ? 
C1 H1C 0.9600 . ? 
C1 H1D 0.9600 . ? 
C2 C3 1.363(10) . ? 
C2 C7 1.419(9) . ? 
C3 C4 1.403(12) . ? 
C3 H3A 0.9300 . ? 
C4 C5 1.379(12) . ? 
C4 H4A 0.9300 . ? 
C5 C6 1.419(10) . ? 
C5 H5A 0.9300 . ? 
C6 C7 1.396(10) . ? 
C6 C8 1.446(10) . ? 
C8 H8A 0.9300 . ? 
C9 C10 1.507(12) . ? 
C9 H9A 0.9700 . ? 
C9 H9B 0.9700 . ? 
C10 C11 1.493(8) . ? 
C10 H10A 0.9800 . ? 
C11 H11A 0.9700 . ? 
C11 H11B 0.9700 . ? 
C12 C13 1.442(11) . ? 
C12 H12A 0.9300 . ? 
C13 C18 1.403(10) . ? 
C13 C14 1.425(9) . ? 
C14 C15 1.353(12) . ? 
C14 H14A 0.9300 . ? 
C15 C16 1.390(13) . ? 
C15 H15A 0.9300 . ? 
C16 C17 1.397(10) . ? 
C16 H16B 0.9300 . ? 
C17 C18 1.406(10) . ? 
C19 H19A 0.9600 . ? 
C19 H19B 0.9600 . ? 
C19 H19C 0.9600 . ? 
C20 H20A 0.9600 . ? 
C20 H20B 0.9600 . ? 
C20 H20C 0.9600 . ? 
C21 C22 1.381(12) . ? 
C21 C26 1.436(12) . ? 
C22 C23 1.377(14) . ? 
C22 H22A 0.9300 . ? 
C23 C24 1.372(13) . ? 
C23 H23A 0.9300 . ? 
C24 C25 1.434(11) . ? 
C24 H24A 0.9300 . ? 
C25 C27 1.452(13) . ? 
C25 C26 1.476(14) . ? 
C27 H27A 0.9300 . ? 
C28 C29 1.512(10) . ? 
C28 H28A 0.9700 . ? 
C28 H28B 0.9700 . ? 
C29 C30 1.538(10) . ? 
C29 H29A 0.9800 . ? 
C30 H30A 0.9700 . ? 
C30 H30B 0.9700 . ? 
C31 C32 1.459(9) . ? 
C31 H31A 0.9300 . ? 
C32 C37 1.408(10) . ? 
C32 C33 1.422(10) . ? 
C33 C34 1.352(10) . ? 
C33 H33A 0.9300 . ? 
C34 C35 1.390(12) . ? 
C34 H34A 0.9300 . ? 
C35 C36 1.373(11) . ? 
C35 H35A 0.9300 . ? 
C36 C37 1.431(9) . ? 
C38 H38A 0.9600 . ? 
C38 H38B 0.9600 . ? 
C38 H38C 0.9600 . ? 
C39 H39A 0.9600 . ? 
C39 H39B 0.9600 . ? 
C39 H39C 0.9600 . ? 
C40 H40A 0.9600 . ? 
C40 H40B 0.9600 . ? 
C40 H40C 0.9600 . ? 
C41 O15 1.492(15) . ? 
C41 H41A 0.9600 . ? 
C41 H41B 0.9600 . ? 
C41 H41C 0.9600 . ? 
O15 H15B 0.8200 . ? 
C42 O16 1.648(9) . ? 
C42 H42B 0.9600 . ? 
C42 H42C 0.9600 . ? 
C42 H42D 0.9600 . ? 
O16 H16A 0.8200 . ? 
 
loop_ 
 _geom_angle_atom_site_label_1 
 _geom_angle_atom_site_label_2 
 _geom_angle_atom_site_label_3 
 _geom_angle 
 _geom_angle_site_symmetry_1 
 _geom_angle_site_symmetry_3 
 _geom_angle_publ_flag 
O3 Tb1 O11 154.21(16) 2_766 . ? 
O3 Tb1 O2 130.32(16) 2_766 2_766 ? 
O11 Tb1 O2 72.70(15) . 2_766 ? 
O3 Tb1 O14 80.87(17) 2_766 . ? 
O11 Tb1 O14 98.63(16) . . ? 
O2 Tb1 O14 72.97(16) 2_766 . ? 
O3 Tb1 O12 70.11(16) 2_766 2_766 ? 
O11 Tb1 O12 84.54(15) . 2_766 ? 
O2 Tb1 O12 138.98(15) 2_766 2_766 ? 
O14 Tb1 O12 77.46(16) . 2_766 ? 
O3 Tb1 O12 85.87(15) 2_766 . ? 
O11 Tb1 O12 80.84(14) . . ? 
O2 Tb1 O12 135.80(14) 2_766 . ? 
O14 Tb1 O12 147.17(16) . . ? 
O12 Tb1 O12 69.79(17) 2_766 . ? 
O3 Tb1 O8 133.24(16) 2_766 . ? 
O11 Tb1 O8 61.26(15) . . ? 
O2 Tb1 O8 66.94(14) 2_766 . ? 
O14 Tb1 O8 138.86(15) . . ? 
O12 Tb1 O8 129.82(14) 2_766 . ? 
O12 Tb1 O8 69.40(14) . . ? 
O3 Tb1 N1 65.75(17) 2_766 2_766 ? 
O11 Tb1 N1 139.95(16) . 2_766 ? 
O2 Tb1 N1 69.19(17) 2_766 2_766 ? 
O14 Tb1 N1 81.75(19) . 2_766 ? 
O12 Tb1 N1 133.48(16) 2_766 2_766 ? 
O12 Tb1 N1 119.57(17) . 2_766 ? 
O8 Tb1 N1 92.25(16) . 2_766 ? 
O3 Tb1 Tb2 34.13(12) 2_766 2_766 ? 
O11 Tb1 Tb2 121.14(11) . 2_766 ? 
O2 Tb1 Tb2 143.29(10) 2_766 2_766 ? 
O14 Tb1 Tb2 71.37(12) . 2_766 ? 
O12 Tb1 Tb2 36.72(10) 2_766 2_766 ? 
O12 Tb1 Tb2 80.83(10) . 2_766 ? 
O8 Tb1 Tb2 149.56(10) . 2_766 ? 
N1 Tb1 Tb2 97.14(13) 2_766 2_766 ? 
O3 Tb1 Tb1 75.46(12) 2_766 2_766 ? 
O11 Tb1 Tb1 81.08(10) . 2_766 ? 
O2 Tb1 Tb1 153.77(11) 2_766 2_766 ? 
O14 Tb1 Tb1 112.37(13) . 2_766 ? 
O12 Tb1 Tb1 34.94(10) 2_766 2_766 ? 
O12 Tb1 Tb1 34.86(10) . 2_766 ? 
O8 Tb1 Tb1 100.10(10) . 2_766 ? 
N1 Tb1 Tb1 136.07(12) 2_766 2_766 ? 
Tb2 Tb1 Tb1 54.17(2) 2_766 2_766 ? 
O3 Tb2 O7 80.96(18) . . ? 
O3 Tb2 O4 132.96(16) . . ? 
O7 Tb2 O4 118.27(17) . . ? 
O3 Tb2 O12 69.55(15) . . ? 
O7 Tb2 O12 91.92(18) . . ? 
O4 Tb2 O12 142.48(15) . . ? 
O3 Tb2 O8 128.75(15) . . ? 
O7 Tb2 O8 132.35(18) . . ? 
O4 Tb2 O8 71.60(15) . . ? 
O12 Tb2 O8 71.50(14) . . ? 
O3 Tb2 O11 79.55(16) . . ? 
O7 Tb2 O11 160.47(17) . . ? 
O4 Tb2 O11 76.83(14) . . ? 
O12 Tb2 O11 80.14(14) . . ? 
O8 Tb2 O11 61.94(15) . . ? 
O3 Tb2 N3 148.57(18) . . ? 
O7 Tb2 N3 71.0(2) . . ? 
O4 Tb2 N3 74.90(18) . . ? 
O12 Tb2 N3 96.92(18) . . ? 
O8 Tb2 N3 67.37(17) . . ? 
O11 Tb2 N3 127.40(18) . . ? 
O3 Tb2 N2 67.08(18) . . ? 
O7 Tb2 N2 88.9(2) . . ? 
O4 Tb2 N2 70.69(19) . . ? 
O12 Tb2 N2 135.92(18) . . ? 
O8 Tb2 N2 134.12(19) . . ? 
O11 Tb2 N2 84.7(2) . . ? 
N3 Tb2 N2 124.6(2) . . ? 
O3 Tb2 Tb1 33.24(11) . 2_766 ? 
O7 Tb2 Tb1 80.06(13) . 2_766 ? 
O4 Tb2 Tb1 158.46(11) . 2_766 ? 
O12 Tb2 Tb1 37.04(11) . 2_766 ? 
O8 Tb2 Tb1 105.33(10) . 2_766 ? 
O11 Tb2 Tb1 82.97(10) . 2_766 ? 
N3 Tb2 Tb1 124.46(14) . 2_766 ? 
N2 Tb2 Tb1 100.31(15) . 2_766 ? 
O9 Tb3 O2 125.63(16) . 2_766 ? 
O9 Tb3 O4 92.21(16) . . ? 
O2 Tb3 O4 138.24(15) 2_766 . ? 
O9 Tb3 O11 156.13(16) . . ? 
O2 Tb3 O11 72.71(15) 2_766 . ? 
O4 Tb3 O11 77.42(15) . . ? 
O9 Tb3 O13 79.24(17) . . ? 
O2 Tb3 O13 114.38(17) 2_766 . ? 
O4 Tb3 O13 87.00(17) . . ? 
O11 Tb3 O13 78.80(15) . . ? 
O9 Tb3 O8 134.97(17) . . ? 
O2 Tb3 O8 68.98(14) 2_766 . ? 
O4 Tb3 O8 71.52(15) . . ? 
O11 Tb3 O8 62.21(15) . . ? 
O13 Tb3 O8 138.38(16) . . ? 
O9 Tb3 N4 73.69(18) . . ? 
O2 Tb3 N4 78.72(17) 2_766 . ? 
O4 Tb3 N4 98.79(17) . . ? 
O11 Tb3 N4 128.72(15) . . ? 
O13 Tb3 N4 152.47(16) . . ? 
O8 Tb3 N4 68.11(16) . . ? 
O9 Tb3 O1 72.91(16) . 2_766 ? 
O2 Tb3 O1 61.37(14) 2_766 2_766 ? 
O4 Tb3 O1 159.56(15) . 2_766 ? 
O11 Tb3 O1 110.67(15) . 2_766 ? 
O13 Tb3 O1 76.67(17) . 2_766 ? 
O8 Tb3 O1 128.92(14) . 2_766 ? 
N4 Tb3 O1 90.53(17) . 2_766 ? 
C2 O1 C1 117.0(5) . . ? 
C2 O1 Tb3 113.8(4) . 2_766 ? 
C1 O1 Tb3 125.3(4) . 2_766 ? 
C7 O2 Tb3 122.7(4) . 2_766 ? 
C7 O2 Tb1 135.7(4) . 2_766 ? 
Tb3 O2 Tb1 101.47(16) 2_766 2_766 ? 
C10 O3 Tb1 124.6(4) . 2_766 ? 
C10 O3 Tb2 118.1(4) . . ? 
Tb1 O3 Tb2 112.63(19) 2_766 . ? 
C18 O4 Tb3 128.5(4) . . ? 
C18 O4 Tb2 130.8(4) . . ? 
Tb3 O4 Tb2 97.18(15) . . ? 
C17 O5 C19 118.2(6) . . ? 
C21 O6 C20 117.3(8) . . ? 
C26 O7 Tb2 138.6(6) . . ? 
C29 O8 Tb2 121.0(4) . . ? 
C29 O8 Tb3 118.4(4) . . ? 
Tb2 O8 Tb3 95.52(16) . . ? 
C29 O8 Tb1 125.5(4) . . ? 
Tb2 O8 Tb1 92.70(15) . . ? 
Tb3 O8 Tb1 96.65(15) . . ? 
C37 O9 Tb3 140.0(4) . . ? 
C36 O10 C38 117.2(6) . . ? 
Tb1 O11 Tb3 100.52(17) . . ? 
Tb1 O11 Tb2 95.38(14) . . ? 
Tb3 O11 Tb2 95.02(15) . . ? 
Tb1 O11 H11C 120.1 . . ? 
Tb3 O11 H11C 120.1 . . ? 
Tb2 O11 H11C 120.1 . . ? 
Tb2 O12 Tb1 106.24(17) . 2_766 ? 
Tb2 O12 Tb1 95.28(14) . . ? 
Tb1 O12 Tb1 110.21(17) 2_766 . ? 
Tb2 O12 H12B 114.4 . . ? 
Tb1 O12 H12B 114.4 2_766 . ? 
Tb1 O12 H12B 114.4 . . ? 
C39 O13 Tb3 129.2(5) . . ? 
C39 O13 H13A 109.5 . . ? 
Tb3 O13 H13A 102.0 . . ? 
C40 O14 Tb1 133.3(5) . . ? 
C40 O14 H14B 109.5 . . ? 
Tb1 O14 H14B 100.2 . . ? 
C8 N1 C9 117.2(6) . . ? 
C8 N1 Tb1 128.4(5) . 2_766 ? 
C9 N1 Tb1 109.5(4) . 2_766 ? 
C12 N2 C11 114.9(7) . . ? 
C12 N2 Tb2 130.0(6) . . ? 
C11 N2 Tb2 114.3(5) . . ? 
C27 N3 C28 117.9(7) . . ? 
C27 N3 Tb2 128.0(6) . . ? 
C28 N3 Tb2 112.3(4) . . ? 
C31 N4 C30 115.8(6) . . ? 
C31 N4 Tb3 130.0(5) . . ? 
C30 N4 Tb3 114.2(4) . . ? 
O1 C1 H1B 109.5 . . ? 
O1 C1 H1C 109.5 . . ? 
H1B C1 H1C 109.5 . . ? 
O1 C1 H1D 109.5 . . ? 
H1B C1 H1D 109.5 . . ? 
H1C C1 H1D 109.5 . . ? 
C3 C2 O1 124.6(6) . . ? 
C3 C2 C7 123.1(7) . . ? 
O1 C2 C7 112.2(5) . . ? 
C2 C3 C4 118.5(7) . . ? 
C2 C3 H3A 120.7 . . ? 
C4 C3 H3A 120.7 . . ? 
C5 C4 C3 120.4(7) . . ? 
C5 C4 H4A 119.8 . . ? 
C3 C4 H4A 119.8 . . ? 
C4 C5 C6 120.8(7) . . ? 
C4 C5 H5A 119.6 . . ? 
C6 C5 H5A 119.6 . . ? 
C7 C6 C5 119.3(7) . . ? 
C7 C6 C8 123.1(6) . . ? 
C5 C6 C8 117.4(7) . . ? 
O2 C7 C6 124.4(6) . . ? 
O2 C7 C2 117.8(6) . . ? 
C6 C7 C2 117.8(6) . . ? 
N1 C8 C6 126.6(6) . . ? 
N1 C8 H8A 116.7 . . ? 
C6 C8 H8A 116.7 . . ? 
N1 C9 C10 104.5(6) . . ? 
N1 C9 H9A 110.9 . . ? 
C10 C9 H9A 110.9 . . ? 
N1 C9 H9B 110.9 . . ? 
C10 C9 H9B 110.9 . . ? 
H9A C9 H9B 108.9 . . ? 
O3 C10 C11 111.8(8) . . ? 
O3 C10 C9 110.3(7) . . ? 
C11 C10 C9 115.0(8) . . ? 
O3 C10 H10A 106.4 . . ? 
C11 C10 H10A 106.4 . . ? 
C9 C10 H10A 106.4 . . ? 
N2 C11 C10 107.2(8) . . ? 
N2 C11 H11A 110.3 . . ? 
C10 C11 H11A 110.3 . . ? 
N2 C11 H11B 110.3 . . ? 
C10 C11 H11B 110.3 . . ? 
H11A C11 H11B 108.5 . . ? 
N2 C12 C13 126.7(8) . . ? 
N2 C12 H12A 116.7 . . ? 
C13 C12 H12A 116.7 . . ? 
C18 C13 C14 120.2(7) . . ? 
C18 C13 C12 123.8(6) . . ? 
C14 C13 C12 116.0(7) . . ? 
C15 C14 C13 120.2(8) . . ? 
C15 C14 H14A 119.9 . . ? 
C13 C14 H14A 119.9 . . ? 
C14 C15 C16 121.0(7) . . ? 
C14 C15 H15A 119.5 . . ? 
C16 C15 H15A 119.5 . . ? 
C15 C16 C17 119.4(8) . . ? 
C15 C16 H16B 120.3 . . ? 
C17 C16 H16B 120.3 . . ? 
O5 C17 C16 123.3(7) . . ? 
O5 C17 C18 115.2(6) . . ? 
C16 C17 C18 121.5(8) . . ? 
O4 C18 C13 122.1(6) . . ? 
O4 C18 C17 120.3(7) . . ? 
C13 C18 C17 117.6(6) . . ? 
O5 C19 H19A 109.5 . . ? 
O5 C19 H19B 109.5 . . ? 
H19A C19 H19B 109.5 . . ? 
O5 C19 H19C 109.5 . . ? 
H19A C19 H19C 109.5 . . ? 
H19B C19 H19C 109.5 . . ? 
O6 C20 H20A 109.5 . . ? 
O6 C20 H20B 109.5 . . ? 
H20A C20 H20B 109.5 . . ? 
O6 C20 H20C 109.5 . . ? 
H20A C20 H20C 109.5 . . ? 
H20B C20 H20C 109.5 . . ? 
O6 C21 C22 126.1(9) . . ? 
O6 C21 C26 109.7(8) . . ? 
C22 C21 C26 124.2(10) . . ? 
C23 C22 C21 120.9(9) . . ? 
C23 C22 H22A 119.5 . . ? 
C21 C22 H22A 119.5 . . ? 
C24 C23 C22 121.0(8) . . ? 
C24 C23 H23A 119.5 . . ? 
C22 C23 H23A 119.5 . . ? 
C23 C24 C25 118.7(9) . . ? 
C23 C24 H24A 120.6 . . ? 
C25 C24 H24A 120.6 . . ? 
C24 C25 C27 116.2(9) . . ? 
C24 C25 C26 122.9(9) . . ? 
C27 C25 C26 120.9(7) . . ? 
O7 C26 C21 122.3(10) . . ? 
O7 C26 C25 125.8(8) . . ? 
C21 C26 C25 112.0(9) . . ? 
N3 C27 C25 127.3(9) . . ? 
N3 C27 H27A 116.3 . . ? 
C25 C27 H27A 116.3 . . ? 
N3 C28 C29 111.3(6) . . ? 
N3 C28 H28A 109.4 . . ? 
C29 C28 H28A 109.4 . . ? 
N3 C28 H28B 109.4 . . ? 
C29 C28 H28B 109.4 . . ? 
H28A C28 H28B 108.0 . . ? 
O8 C29 C28 109.3(6) . . ? 
O8 C29 C30 108.7(5) . . ? 
C28 C29 C30 111.1(6) . . ? 
O8 C29 H29A 109.3 . . ? 
C28 C29 H29A 109.3 . . ? 
C30 C29 H29A 109.3 . . ? 
N4 C30 C29 108.8(6) . . ? 
N4 C30 H30A 109.9 . . ? 
C29 C30 H30A 109.9 . . ? 
N4 C30 H30B 109.9 . . ? 
C29 C30 H30B 109.9 . . ? 
H30A C30 H30B 108.3 . . ? 
N4 C31 C32 125.9(7) . . ? 
N4 C31 H31A 117.0 . . ? 
C32 C31 H31A 117.0 . . ? 
C37 C32 C33 119.9(6) . . ? 
C37 C32 C31 123.9(6) . . ? 
C33 C32 C31 116.2(7) . . ? 
C34 C33 C32 121.8(8) . . ? 
C34 C33 H33A 119.1 . . ? 
C32 C33 H33A 119.1 . . ? 
C33 C34 C35 119.4(7) . . ? 
C33 C34 H34A 120.3 . . ? 
C35 C34 H34A 120.3 . . ? 
C36 C35 C34 120.6(7) . . ? 
C36 C35 H35A 119.7 . . ? 
C34 C35 H35A 119.7 . . ? 
C35 C36 O10 125.0(7) . . ? 
C35 C36 C37 121.9(7) . . ? 
O10 C36 C37 113.1(6) . . ? 
O9 C37 C32 123.4(6) . . ? 
O9 C37 C36 120.2(6) . . ? 
C32 C37 C36 116.4(6) . . ? 
O10 C38 H38A 109.5 . . ? 
O10 C38 H38B 109.5 . . ? 
H38A C38 H38B 109.5 . . ? 
O10 C38 H38C 109.5 . . ? 
H38A C38 H38C 109.5 . . ? 
H38B C38 H38C 109.5 . . ? 
O13 C39 H39A 109.5 . . ? 
O13 C39 H39B 109.5 . . ? 
H39A C39 H39B 109.5 . . ? 
O13 C39 H39C 109.5 . . ? 
H39A C39 H39C 109.5 . . ? 
H39B C39 H39C 109.5 . . ? 
O14 C40 H40A 109.5 . . ? 
O14 C40 H40B 109.5 . . ? 
H40A C40 H40B 109.5 . . ? 
O14 C40 H40C 109.5 . . ? 
H40A C40 H40C 109.5 . . ? 
H40B C40 H40C 109.5 . . ? 
O15 C41 H41A 109.5 . . ? 
O15 C41 H41B 109.5 . . ? 
H41A C41 H41B 109.5 . . ? 
O15 C41 H41C 109.5 . . ? 
H41A C41 H41C 109.5 . . ? 
H41B C41 H41C 109.5 . . ? 
C41 O15 H15B 109.5 . . ? 
O16 C42 H42B 109.5 . . ? 
O16 C42 H42C 109.5 . . ? 
H42B C42 H42C 109.5 . . ? 
O16 C42 H42D 109.5 . . ? 
H42B C42 H42D 109.5 . . ? 
H42C C42 H42D 109.5 . . ? 
C42 O16 H16A 109.5 . . ? 
 
_diffrn_measured_fraction_theta_max    0.994 
_diffrn_reflns_theta_full              25.00 
_diffrn_measured_fraction_theta_full   0.994 
_refine_diff_density_max    2.388 
_refine_diff_density_min   -1.601 
_refine_diff_density_rms    0.169 

#===END

data_complex-3 
 
_audit_creation_method            SHELXL-97 
_chemical_name_systematic 
; 
 ? 
; 
_chemical_name_common             ? 
_chemical_melting_point           ? 
_chemical_formula_moiety          
 'C74 H84 Eu6 N8 O22, 3(C2 H6 O), 2(Cl), O'  
_chemical_formula_sum 
 'C80 H102 Cl2 Eu6 N8 O26' 
_chemical_formula_weight          2574.36 
 
loop_ 
 _atom_type_symbol 
 _atom_type_description 
 _atom_type_scat_dispersion_real 
 _atom_type_scat_dispersion_imag 
 _atom_type_scat_source 
 'C'  'C'   0.0033   0.0016 
 'International Tables Vol C Tables 4.2.6.8 and 6.1.1.4' 
 'H'  'H'   0.0000   0.0000 
 'International Tables Vol C Tables 4.2.6.8 and 6.1.1.4' 
 'N'  'N'   0.0061   0.0033 
 'International Tables Vol C Tables 4.2.6.8 and 6.1.1.4' 
 'O'  'O'   0.0106   0.0060 
 'International Tables Vol C Tables 4.2.6.8 and 6.1.1.4' 
 'Cl'  'Cl'   0.1484   0.1585 
 'International Tables Vol C Tables 4.2.6.8 and 6.1.1.4' 
 'Eu'  'Eu'  -0.1578   3.6682 
 'International Tables Vol C Tables 4.2.6.8 and 6.1.1.4' 
 
_symmetry_cell_setting            Triclinic 
_symmetry_space_group_name_H-M    P-1 
 
loop_ 
 _symmetry_equiv_pos_as_xyz 
 'x, y, z' 
 '-x, -y, -z' 
 
_cell_length_a                    11.842(2) 
_cell_length_b                    14.830(3) 
_cell_length_c                    16.045(3) 
_cell_angle_alpha                 96.17(3) 
_cell_angle_beta                  105.52(3) 
_cell_angle_gamma                 108.75(2) 
_cell_volume                      2512.3(9) 
_cell_formula_units_Z             1 
_cell_measurement_temperature     223(2) 
_cell_measurement_reflns_used     6629 
_cell_measurement_theta_min       2.1922 
_cell_measurement_theta_max       31.8628 
 
_exptl_crystal_description        Block 
_exptl_crystal_colour             Yellow 
_exptl_crystal_size_max           0.20 
_exptl_crystal_size_mid           0.12 
_exptl_crystal_size_min           0.08 
_exptl_crystal_density_meas       ? 
_exptl_crystal_density_diffrn     1.702 
_exptl_crystal_density_method     'not measured' 
_exptl_crystal_F_000              1258 
_exptl_absorpt_coefficient_mu     3.811 
_exptl_absorpt_correction_type    'Multi-scan' 
_exptl_absorpt_correction_T_min   0.7046 
_exptl_absorpt_correction_T_max   1.0000 
_exptl_absorpt_process_details    
'DENZO and Scalepack (Otwinoski and Minor, 1997)'
 
_exptl_special_details 
; 
 ? 
; 
 
_diffrn_ambient_temperature       223(1) 
_diffrn_radiation_wavelength      0.710747 
_diffrn_radiation_type            MoK\a 
_diffrn_radiation_source          'Sealed tube' 
_diffrn_radiation_monochromator   'Graphite Monochromator' 
_diffrn_measurement_device_type   'Mercury2 (2x2 bin mode)' 
_diffrn_measurement_method        'dtprofit.ref' 
_diffrn_detector_area_resol_mean  13.6612 
_diffrn_standards_number          ? 
_diffrn_standards_interval_count  ? 
_diffrn_standards_interval_time   ? 
_diffrn_standards_decay_%         ? 
_diffrn_reflns_number             21848 
_diffrn_reflns_av_R_equivalents   0.0511 
_diffrn_reflns_av_sigmaI/netI     0.0563 
_diffrn_reflns_limit_h_min        -14 
_diffrn_reflns_limit_h_max        14 
_diffrn_reflns_limit_k_min        -17 
_diffrn_reflns_limit_k_max        17 
_diffrn_reflns_limit_l_min        -19 
_diffrn_reflns_limit_l_max        19 
_diffrn_reflns_theta_min          3.07 
_diffrn_reflns_theta_max          25.00 
_reflns_number_total              8815 
_reflns_number_gt                 7467 
_reflns_threshold_expression      >2sigma(I) 
 
_publ_section_acknowledgements
;
The data were collected using instrumentation purchased with funds provided
by the National Science Foundation Grant No. 0741973.
;

_publ_section_references
;
Altomare A., Burla M.C., Camalli M., Cascarano G.L., Giacovazzo C., 
Guagliardi A., Moliterni A.G.G., Polidori G.,Spagna R. Sir97.  
(1999) J. Appl. Cryst. 32, 115-119.

Otwinowski, Z. and Minor, W.  (1997).  Methods in Enzymology,
276, Macromolecular Crystallography, part A, 307-326, C. W. Carter,
Jr. and R. M. Sweets, Eds., Academic Press.

Sheldrick, G. M.  (1998).  SHELXTL/PC.  Release 5.10.  Siemens 
Analytical X-ray Instruments, Inc., Madison, WI, USA.


;
_computing_data_collection        'Collect software, Nonius B.V. 1998'
_computing_cell_refinement        'Collect software, Nonius B.V. 1998'
_computing_data_reduction         
;
DENZO and Scalepack (Otwinoski and Minor, 1997)
;
_computing_structure_solution     
;

SIR97 - Altomare A., Burla M.C., Camalli M., Cascarano G.L., Giacovazzo C., 
Guagliardi A., Moliterni A.G.G., Polidori G.,Spagna R.
;
_computing_structure_refinement   'XL SHELXTL/PC, Siemens Analytical'
_computing_molecular_graphics     'XP SHELXTL/PC, Siemens Analytical' 
_computing_publication_material   ? 


  
_refine_special_details 
; 
 Refinement of F^2^ against ALL reflections.  The weighted R-factor wR and 
 goodness of fit S are based on F^2^, conventional R-factors R are based 
 on F, with F set to zero for negative F^2^. The threshold expression of 
 F^2^ > 2sigma(F^2^) is used only for calculating R-factors(gt) etc. and is 
 not relevant to the choice of reflections for refinement.  R-factors based 
 on F^2^ are statistically about twice as large as those based on F, and R- 
 factors based on ALL data will be even larger. 

 Restraints 44: The bond lengths of the uncoordinate EtOH are fixed; ISOR was 
 applied to uncoordinate EtOH atoms to allow their Uij components approximate
 to isotropic behavior.

 Hydrogen atoms of water molecules were not added.

;
 
_refine_ls_structure_factor_coef  Fsqd  
_refine_ls_matrix_type            full 
_refine_ls_weighting_scheme       calc  
_refine_ls_weighting_details 
 'calc w=1/[\s^2^(Fo^2^)+(0.0637P)^2^+17.9480P] where P=(Fo^2^+2Fc^2^)/3' 
_atom_sites_solution_primary      direct 
_atom_sites_solution_secondary    difmap 
_atom_sites_solution_hydrogens    geom 
_refine_ls_hydrogen_treatment     constr 
_refine_ls_extinction_method      none 
_refine_ls_extinction_coef        ? 
_refine_ls_number_reflns          8815 
_refine_ls_number_parameters      568 
_refine_ls_number_restraints      44 
_refine_ls_R_factor_all           0.0625 
_refine_ls_R_factor_gt            0.0518 
_refine_ls_wR_factor_ref          0.1399 
_refine_ls_wR_factor_gt           0.1304 
_refine_ls_goodness_of_fit_ref    1.036 
_refine_ls_restrained_S_all       1.037 
_refine_ls_shift/su_max           0.001 
_refine_ls_shift/su_mean          0.000 
 
loop_ 
 _atom_site_label 
 _atom_site_type_symbol 
 _atom_site_fract_x 
 _atom_site_fract_y 
 _atom_site_fract_z 
 _atom_site_U_iso_or_equiv 
 _atom_site_adp_type 
 _atom_site_occupancy 
 _atom_site_symmetry_multiplicity 
 _atom_site_calc_flag 
 _atom_site_refinement_flags 
 _atom_site_disorder_assembly 
 _atom_site_disorder_group 
Eu1 Eu 0.56040(4) 0.96919(3) 0.32843(3) 0.03063(13) Uani 1 1 d . . . 
Eu2 Eu 0.45352(4) 0.85577(3) 0.48986(3) 0.02851(12) Uani 1 1 d . . . 
Eu3 Eu 0.35819(5) 0.72307(3) 0.26836(3) 0.04574(15) Uani 1 1 d . . . 
Cl1 Cl 0.1213(3) 0.9067(2) 0.3517(2) 0.0716(8) Uani 1 1 d . . . 
N1 N 0.5269(9) 0.6567(5) 0.2751(5) 0.054(2) Uani 1 1 d . . . 
N2 N 0.7727(7) 0.9550(5) 0.3782(5) 0.0418(17) Uani 1 1 d . . . 
N3 N 0.4075(9) 0.9913(6) 0.1936(5) 0.054(2) Uani 1 1 d . . . 
N4 N 0.4540(7) 1.2473(5) 0.4220(5) 0.0419(17) Uani 1 1 d . . . 
O1 O 0.2677(9) 0.5746(5) 0.1872(5) 0.078(3) Uani 1 1 d . . . 
O2 O 0.5551(6) 0.8240(4) 0.3841(4) 0.0387(13) Uani 1 1 d . . . 
O3 O 0.6973(6) 1.1006(5) 0.3038(5) 0.0539(17) Uani 1 1 d . . . 
O4 O 0.4945(7) 0.8373(4) 0.2116(4) 0.0475(15) Uani 1 1 d . . . 
O5 O 0.4780(6) 1.0825(4) 0.3638(4) 0.0404(14) Uani 1 1 d . . . 
O6 O 0.6421(6) 1.3098(4) 0.5927(4) 0.0405(14) Uani 1 1 d . . . 
O7 O 0.3661(6) 0.8674(4) 0.3434(4) 0.0406(14) Uani 1 1 d . . . 
H7B H 0.2923 0.8863 0.3278 0.049 Uiso 1 1 calc R . . 
O8 O 0.6077(5) 1.0087(4) 0.4831(4) 0.0369(13) Uani 1 1 d . . . 
H8D H 0.6949 1.0197 0.5168 0.044 Uiso 1 1 calc R . . 
O9 O 0.1332(8) 0.6939(7) 0.2761(6) 0.087(3) Uani 1 1 d . . . 
O10 O 0.2712(6) 0.7832(5) 0.5362(5) 0.0574(19) Uani 1 1 d . . . 
H10C H 0.2632 0.8341 0.5538 0.069 Uiso 1 1 calc R . . 
O11 O 0.2186(8) 0.7468(6) 0.1337(6) 0.083(3) Uani 1 1 d . . . 
H11B H 0.1625 0.7535 0.1516 0.099 Uiso 1 1 calc R . . 
C1 C 0.2806(16) 0.4925(8) 0.1721(8) 0.076(4) Uani 1 1 d . . . 
C2 C 0.1792(17) 0.4071(8) 0.1271(9) 0.103(6) Uani 1 1 d . . . 
H2A H 0.0999 0.4111 0.1094 0.123 Uiso 1 1 calc R . . 
C3 C 0.1861(18) 0.3195(9) 0.1070(10) 0.091(5) Uani 1 1 d . . . 
H3A H 0.1147 0.2656 0.0746 0.109 Uiso 1 1 calc R . . 
C4 C 0.3051(16) 0.3119(7) 0.1366(8) 0.079(4) Uani 1 1 d . . . 
H4A H 0.3118 0.2513 0.1256 0.095 Uiso 1 1 calc R . . 
C5 C 0.4144(16) 0.3941(8) 0.1826(8) 0.083(4) Uani 1 1 d . . . 
H5A H 0.4934 0.3894 0.2002 0.100 Uiso 1 1 calc R . . 
C6 C 0.3987(15) 0.4855(7) 0.2013(7) 0.069(4) Uani 1 1 d . . . 
C7 C 0.5187(13) 0.5679(7) 0.2493(7) 0.064(3) Uani 1 1 d . . . 
H7A H 0.5929 0.5553 0.2618 0.077 Uiso 1 1 calc R . . 
C8 C 0.6517(12) 0.7304(8) 0.3171(7) 0.061(3) Uani 1 1 d . . . 
H8A H 0.6731 0.7711 0.2760 0.073 Uiso 1 1 calc R . . 
H8B H 0.7125 0.6988 0.3314 0.073 Uiso 1 1 calc R . . 
C9 C 0.6603(9) 0.7943(6) 0.4016(6) 0.040(2) Uani 1 1 d . . . 
H9A H 0.6577 0.7560 0.4476 0.048 Uiso 1 1 calc R . . 
C10 C 0.7797(9) 0.8847(7) 0.4354(6) 0.045(2) Uani 1 1 d . . . 
H10A H 0.7909 0.9144 0.4953 0.054 Uiso 1 1 calc R . . 
H10B H 0.8518 0.8666 0.4363 0.054 Uiso 1 1 calc R . . 
C11 C 0.8709(9) 0.9966(7) 0.3583(6) 0.043(2) Uani 1 1 d . . . 
H11A H 0.9394 0.9780 0.3794 0.052 Uiso 1 1 calc R . . 
C12 C 0.8860(9) 1.0719(7) 0.3045(6) 0.044(2) Uani 1 1 d . . . 
C13 C 0.9956(9) 1.0982(7) 0.2804(7) 0.055(3) Uani 1 1 d . . . 
H13A H 1.0524 1.0673 0.2979 0.066 Uiso 1 1 calc R . . 
C14 C 1.0218(10) 1.1689(8) 0.2315(8) 0.063(3) Uani 1 1 d . . . 
H14A H 1.0947 1.1855 0.2157 0.076 Uiso 1 1 calc R . . 
C15 C 0.9350(10) 1.2147(8) 0.2065(7) 0.057(3) Uani 1 1 d . . . 
H15A H 0.9496 1.2618 0.1727 0.069 Uiso 1 1 calc R . . 
C16 C 0.8284(10) 1.1907(8) 0.2314(7) 0.058(3) Uani 1 1 d . . . 
H16A H 0.7737 1.2236 0.2152 0.070 Uiso 1 1 calc R . . 
C17 C 0.7988(9) 1.1191(6) 0.2800(6) 0.044(2) Uani 1 1 d . . . 
C18 C 0.4782(10) 0.8300(7) 0.1237(6) 0.052(2) Uani 1 1 d . . . 
C19 C 0.5134(12) 0.7593(8) 0.0812(6) 0.061(3) Uani 1 1 d . . . 
H19A H 0.5455 0.7195 0.1133 0.074 Uiso 1 1 calc R . . 
C20 C 0.4999(15) 0.7496(10) -0.0078(8) 0.085(4) Uani 1 1 d . . . 
H20A H 0.5233 0.7033 -0.0352 0.102 Uiso 1 1 calc R . . 
C21 C 0.4519(14) 0.8082(10) -0.0567(7) 0.076(4) Uani 1 1 d . . . 
H21A H 0.4424 0.8010 -0.1167 0.091 Uiso 1 1 calc R . . 
C22 C 0.4186(13) 0.8765(9) -0.0158(7) 0.075(4) Uani 1 1 d . . . 
H22A H 0.3871 0.9161 -0.0487 0.090 Uiso 1 1 calc R . . 
C23 C 0.4307(11) 0.8886(8) 0.0744(6) 0.056(3) Uani 1 1 d . . . 
C24 C 0.3882(12) 0.9592(8) 0.1106(6) 0.060(3) Uani 1 1 d . . . 
H24A H 0.3418 0.9849 0.0701 0.072 Uiso 1 1 calc R . . 
C25 C 0.3393(11) 1.0528(8) 0.2169(7) 0.061(3) Uani 1 1 d . . . 
H25A H 0.2636 1.0132 0.2274 0.073 Uiso 1 1 calc R . . 
H25B H 0.3153 1.0845 0.1690 0.073 Uiso 1 1 calc R . . 
C26 C 0.4247(10) 1.1267(7) 0.2981(6) 0.050(2) Uani 1 1 d . . . 
H26A H 0.4929 1.1726 0.2831 0.060 Uiso 1 1 calc R . . 
C27 C 0.3592(9) 1.1847(7) 0.3399(6) 0.044(2) Uani 1 1 d . . . 
H27A H 0.3301 1.2236 0.3005 0.053 Uiso 1 1 calc R . . 
H27B H 0.2876 1.1410 0.3521 0.053 Uiso 1 1 calc R . . 
C28 C 0.4986(9) 1.3383(6) 0.4240(6) 0.042(2) Uani 1 1 d . . . 
H28A H 0.4594 1.3587 0.3753 0.051 Uiso 1 1 calc R . . 
C29 C 0.6020(9) 1.4140(6) 0.4922(6) 0.043(2) Uani 1 1 d . . . 
C30 C 0.6356(10) 1.5091(7) 0.4756(8) 0.055(3) Uani 1 1 d . . . 
H30A H 0.5902 1.5197 0.4231 0.066 Uiso 1 1 calc R . . 
C31 C 0.7328(11) 1.5852(7) 0.5343(8) 0.062(3) Uani 1 1 d . . . 
H31A H 0.7522 1.6475 0.5225 0.075 Uiso 1 1 calc R . . 
C32 C 0.8028(10) 1.5698(7) 0.6119(7) 0.056(3) Uani 1 1 d . . . 
H32A H 0.8704 1.6219 0.6512 0.067 Uiso 1 1 calc R . . 
C33 C 0.7744(10) 1.4791(7) 0.6317(7) 0.052(2) Uani 1 1 d . . . 
H33A H 0.8232 1.4707 0.6841 0.062 Uiso 1 1 calc R . . 
C34 C 0.6716(8) 1.3977(6) 0.5733(6) 0.039(2) Uani 1 1 d . . . 
C35 C 0.0405(16) 0.7349(16) 0.5000(14) 0.148(8) Uani 1 1 d . . . 
H35A H -0.0361 0.6794 0.4726 0.223 Uiso 1 1 calc R . . 
H35B H 0.0391 0.7865 0.4689 0.223 Uiso 1 1 calc R . . 
H35C H 0.0478 0.7565 0.5605 0.223 Uiso 1 1 calc R . . 
C36 C 0.1492(11) 0.7075(11) 0.4972(11) 0.091(4) Uani 1 1 d . . . 
H36B H 0.1472 0.6538 0.5270 0.109 Uiso 1 1 calc R . . 
H36A H 0.1388 0.6840 0.4358 0.109 Uiso 1 1 calc R . . 
C37 C 0.1626(18) 0.6846(13) 0.0436(12) 0.128(6) Uani 1 1 d . . . 
H37A H 0.1127 0.7129 0.0054 0.192 Uiso 1 1 calc R . . 
H37B H 0.1103 0.6208 0.0457 0.192 Uiso 1 1 calc R . . 
H37C H 0.2285 0.6799 0.0213 0.192 Uiso 1 1 calc R . . 
O12 O 0.734(2) 0.4930(18) 0.1796(17) 0.125(8) Uani 0.50 1 d PU . . 
H12B H 0.7553 0.5297 0.1471 0.187 Uiso 0.50 1 calc PR . . 
C38 C 0.847(4) 0.456(3) 0.309(3) 0.131(13) Uani 0.50 1 d PU . . 
H38A H 0.9165 0.4349 0.3304 0.196 Uiso 0.50 1 calc PR . . 
H38B H 0.7717 0.4085 0.3126 0.196 Uiso 0.50 1 calc PR . . 
H38C H 0.8637 0.5176 0.3445 0.196 Uiso 0.50 1 calc PR . . 
C39 C 0.831(4) 0.464(3) 0.217(3) 0.127(12) Uani 0.50 1 d PU . . 
H39A H 0.9082 0.5102 0.2140 0.152 Uiso 0.50 1 calc PR . . 
H39B H 0.8162 0.4013 0.1822 0.152 Uiso 0.50 1 calc PR . . 
O13 O 0.0571(13) 0.8391(10) 0.1467(9) 0.138(4) Uani 1 1 d DU . . 
H13B H 0.0911 0.8701 0.1979 0.208 Uiso 1 1 calc R . . 
C40 C -0.143(3) 0.886(2) 0.090(2) 0.232(14) Uani 1 1 d DU . . 
H40A H -0.1761 0.9242 0.0531 0.348 Uiso 1 1 calc R . . 
H40B H -0.1399 0.9064 0.1496 0.348 Uiso 1 1 calc R . . 
H40C H -0.1960 0.8183 0.0683 0.348 Uiso 1 1 calc R . . 
C41 C -0.008(3) 0.900(2) 0.088(2) 0.236(14) Uani 1 1 d DU . . 
H41A H 0.0440 0.9682 0.1087 0.283 Uiso 1 1 calc R . . 
H41B H -0.0121 0.8805 0.0274 0.283 Uiso 1 1 calc R . . 
O1W O 0.686(3) 0.553(2) 0.0679(18) 0.148(9) Uani 0.50 1 d PU . . 
 
loop_ 
 _atom_site_aniso_label 
 _atom_site_aniso_U_11 
 _atom_site_aniso_U_22 
 _atom_site_aniso_U_33 
 _atom_site_aniso_U_23 
 _atom_site_aniso_U_13 
 _atom_site_aniso_U_12 
Eu1 0.0399(2) 0.0302(2) 0.0330(2) 0.01187(17) 0.01951(18) 0.01922(18) 
Eu2 0.0369(2) 0.0259(2) 0.0317(2) 0.00970(16) 0.01745(18) 0.01670(17) 
Eu3 0.0714(3) 0.0304(2) 0.0343(3) 0.00405(18) 0.0213(2) 0.0146(2) 
Cl1 0.0632(17) 0.086(2) 0.088(2) 0.0230(17) 0.0288(16) 0.0497(16) 
N1 0.089(7) 0.034(4) 0.044(5) 0.003(3) 0.034(5) 0.022(4) 
N2 0.052(5) 0.044(4) 0.046(4) 0.017(3) 0.030(4) 0.026(4) 
N3 0.079(6) 0.057(5) 0.041(5) 0.015(4) 0.019(4) 0.041(5) 
N4 0.045(4) 0.044(4) 0.051(5) 0.016(4) 0.026(4) 0.024(4) 
O1 0.123(7) 0.044(4) 0.064(5) 0.001(4) 0.044(5) 0.017(4) 
O2 0.048(3) 0.039(3) 0.043(3) 0.012(3) 0.025(3) 0.024(3) 
O3 0.055(4) 0.051(4) 0.080(5) 0.034(4) 0.041(4) 0.030(3) 
O4 0.072(4) 0.046(3) 0.038(3) 0.015(3) 0.027(3) 0.028(3) 
O5 0.050(4) 0.045(3) 0.045(3) 0.020(3) 0.022(3) 0.033(3) 
O6 0.056(4) 0.030(3) 0.039(3) 0.011(2) 0.021(3) 0.014(3) 
O7 0.049(4) 0.041(3) 0.039(3) 0.009(3) 0.018(3) 0.022(3) 
O8 0.039(3) 0.036(3) 0.042(3) 0.010(3) 0.019(3) 0.018(3) 
O9 0.069(6) 0.103(7) 0.081(6) 0.014(5) 0.022(5) 0.023(5) 
O10 0.054(4) 0.039(3) 0.081(5) 0.001(3) 0.041(4) 0.007(3) 
O11 0.079(6) 0.083(6) 0.069(6) -0.013(5) 0.009(5) 0.031(5) 
C1 0.135(13) 0.045(7) 0.063(8) 0.008(5) 0.060(9) 0.030(7) 
C2 0.172(15) 0.040(6) 0.087(10) -0.012(6) 0.085(11) 0.000(8) 
C3 0.134(14) 0.053(8) 0.094(11) 0.012(7) 0.068(11) 0.020(8) 
C4 0.159(14) 0.025(5) 0.061(7) 0.007(5) 0.069(9) 0.017(7) 
C5 0.156(13) 0.050(7) 0.070(8) 0.022(6) 0.074(9) 0.038(8) 
C6 0.136(12) 0.034(5) 0.042(6) 0.010(4) 0.049(7) 0.019(7) 
C7 0.124(10) 0.052(6) 0.052(6) 0.026(5) 0.055(7) 0.052(7) 
C8 0.098(9) 0.060(6) 0.062(7) 0.030(5) 0.048(7) 0.054(7) 
C9 0.060(6) 0.042(5) 0.043(5) 0.019(4) 0.028(4) 0.037(4) 
C10 0.053(6) 0.062(6) 0.043(5) 0.025(4) 0.027(5) 0.037(5) 
C11 0.042(5) 0.048(5) 0.051(5) 0.014(4) 0.019(4) 0.026(4) 
C12 0.051(5) 0.043(5) 0.043(5) 0.011(4) 0.021(4) 0.016(4) 
C13 0.046(6) 0.055(6) 0.070(7) 0.022(5) 0.026(5) 0.019(5) 
C14 0.052(6) 0.069(7) 0.081(8) 0.036(6) 0.036(6) 0.020(6) 
C15 0.055(6) 0.060(6) 0.076(7) 0.036(6) 0.041(6) 0.023(5) 
C16 0.053(6) 0.068(7) 0.069(7) 0.033(6) 0.025(5) 0.032(5) 
C17 0.052(6) 0.042(5) 0.046(5) 0.018(4) 0.022(4) 0.019(4) 
C18 0.066(7) 0.053(6) 0.040(5) 0.006(4) 0.025(5) 0.020(5) 
C19 0.096(9) 0.072(7) 0.040(5) 0.015(5) 0.031(6) 0.052(7) 
C20 0.138(13) 0.097(10) 0.056(7) 0.026(7) 0.045(8) 0.075(10) 
C21 0.119(11) 0.091(9) 0.034(6) 0.015(6) 0.029(6) 0.056(8) 
C22 0.127(11) 0.075(8) 0.045(6) 0.020(6) 0.033(7) 0.058(8) 
C23 0.083(8) 0.060(6) 0.040(5) 0.012(5) 0.029(5) 0.037(6) 
C24 0.098(9) 0.061(6) 0.034(5) 0.016(5) 0.018(5) 0.046(6) 
C25 0.082(8) 0.064(7) 0.055(6) 0.021(5) 0.024(6) 0.044(6) 
C26 0.067(6) 0.061(6) 0.040(5) 0.013(5) 0.018(5) 0.044(5) 
C27 0.052(6) 0.047(5) 0.047(5) 0.016(4) 0.019(5) 0.030(5) 
C28 0.054(6) 0.046(5) 0.053(5) 0.027(4) 0.031(5) 0.035(5) 
C29 0.046(5) 0.033(4) 0.061(6) 0.016(4) 0.029(5) 0.019(4) 
C30 0.064(7) 0.048(6) 0.074(7) 0.031(5) 0.040(6) 0.028(5) 
C31 0.070(7) 0.036(5) 0.090(9) 0.024(6) 0.037(7) 0.017(5) 
C32 0.064(7) 0.035(5) 0.067(7) 0.003(5) 0.028(6) 0.013(5) 
C33 0.055(6) 0.043(5) 0.062(6) 0.010(5) 0.032(5) 0.015(5) 
C34 0.047(5) 0.036(5) 0.049(5) 0.014(4) 0.029(4) 0.019(4) 
C35 0.086(12) 0.18(2) 0.162(19) -0.024(15) 0.052(13) 0.028(12) 
C36 0.051(7) 0.095(10) 0.114(12) -0.010(8) 0.034(8) 0.017(7) 
C37 0.122(15) 0.117(14) 0.117(15) 0.004(11) 0.002(12) 0.043(12) 
O12 0.131(11) 0.129(11) 0.127(11) 0.023(8) 0.051(9) 0.057(9) 
C38 0.134(15) 0.134(15) 0.129(15) 0.018(10) 0.039(10) 0.061(10) 
C39 0.127(15) 0.135(15) 0.126(15) 0.025(10) 0.038(10) 0.060(10) 
O13 0.146(8) 0.133(8) 0.135(8) 0.003(6) 0.030(6) 0.070(7) 
C40 0.223(16) 0.234(17) 0.231(17) 0.019(10) 0.065(10) 0.089(11) 
C41 0.235(17) 0.236(17) 0.235(17) 0.038(10) 0.080(10) 0.085(11) 
O1W 0.162(12) 0.158(13) 0.124(12) 0.032(9) 0.076(9) 0.036(9) 
 
_geom_special_details 
; 
 All esds (except the esd in the dihedral angle between two l.s. planes) 
 are estimated using the full covariance matrix.  The cell esds are taken 
 into account individually in the estimation of esds in distances, angles 
 and torsion angles; correlations between esds in cell parameters are only 
 used when they are defined by crystal symmetry.  An approximate (isotropic) 
 treatment of cell esds is used for estimating esds involving l.s. planes. 
; 
 
loop_ 
 _geom_bond_atom_site_label_1 
 _geom_bond_atom_site_label_2 
 _geom_bond_distance 
 _geom_bond_site_symmetry_2 
 _geom_bond_publ_flag 
Eu1 O3 2.250(6) . ? 
Eu1 O5 2.290(5) . ? 
Eu1 O4 2.323(6) . ? 
Eu1 O8 2.355(6) . ? 
Eu1 O7 2.402(6) . ? 
Eu1 O2 2.407(6) . ? 
Eu1 N2 2.511(7) . ? 
Eu1 N3 2.550(8) . ? 
Eu1 C26 3.243(9) . ? 
Eu1 Eu2 3.7645(13) 2_676 ? 
Eu2 O5 2.248(6) 2_676 ? 
Eu2 O7 2.350(6) . ? 
Eu2 O8 2.381(5) 2_676 ? 
Eu2 O6 2.404(6) 2_676 ? 
Eu2 O2 2.414(5) . ? 
Eu2 O10 2.430(6) . ? 
Eu2 O8 2.446(6) . ? 
Eu2 N4 2.500(7) 2_676 ? 
Eu2 C26 3.266(9) 2_676 ? 
Eu2 Eu1 3.7645(13) 2_676 ? 
Eu2 Eu2 4.0125(13) 2_676 ? 
Eu3 O1 2.194(7) . ? 
Eu3 O7 2.302(6) . ? 
Eu3 O6 2.334(6) 2_676 ? 
Eu3 O4 2.381(6) . ? 
Eu3 O2 2.443(6) . ? 
Eu3 N1 2.479(9) . ? 
Eu3 O11 2.480(9) . ? 
Eu3 O9 2.598(9) . ? 
N1 C7 1.301(12) . ? 
N1 C8 1.450(14) . ? 
N2 C11 1.270(11) . ? 
N2 C10 1.469(11) . ? 
N3 C24 1.298(12) . ? 
N3 C25 1.479(13) . ? 
N4 C28 1.274(11) . ? 
N4 C27 1.460(12) . ? 
N4 Eu2 2.500(7) 2_676 ? 
O1 C1 1.280(14) . ? 
O2 C9 1.421(10) . ? 
O3 C17 1.312(11) . ? 
O4 C18 1.359(11) . ? 
O5 C26 1.413(10) . ? 
O5 Eu2 2.248(6) 2_676 ? 
O6 C34 1.330(10) . ? 
O6 Eu3 2.334(6) 2_676 ? 
O6 Eu2 2.404(6) 2_676 ? 
O7 H7B 0.9800 . ? 
O8 Eu2 2.381(5) 2_676 ? 
O8 H8D 0.9800 . ? 
O10 C36 1.436(14) . ? 
O10 H10C 0.8200 . ? 
O11 C37 1.479(18) . ? 
O11 H11B 0.8200 . ? 
C1 C2 1.389(18) . ? 
C1 C6 1.393(19) . ? 
C2 C3 1.337(19) . ? 
C2 H2A 0.9300 . ? 
C3 C4 1.41(2) . ? 
C3 H3A 0.9300 . ? 
C4 C5 1.409(19) . ? 
C4 H4A 0.9300 . ? 
C5 C6 1.437(16) . ? 
C5 H5A 0.9300 . ? 
C6 C7 1.485(18) . ? 
C7 H7A 0.9300 . ? 
C8 C9 1.528(13) . ? 
C8 H8A 0.9700 . ? 
C8 H8B 0.9700 . ? 
C9 C10 1.519(13) . ? 
C9 H9A 0.9800 . ? 
C10 H10A 0.9700 . ? 
C10 H10B 0.9700 . ? 
C11 C12 1.478(12) . ? 
C11 H11A 0.9300 . ? 
C12 C13 1.401(13) . ? 
C12 C17 1.420(13) . ? 
C13 C14 1.381(14) . ? 
C13 H13A 0.9300 . ? 
C14 C15 1.403(15) . ? 
C14 H14A 0.9300 . ? 
C15 C16 1.376(13) . ? 
C15 H15A 0.9300 . ? 
C16 C17 1.393(13) . ? 
C16 H16A 0.9300 . ? 
C18 C23 1.386(14) . ? 
C18 C19 1.420(13) . ? 
C19 C20 1.379(15) . ? 
C19 H19A 0.9300 . ? 
C20 C21 1.385(17) . ? 
C20 H20A 0.9300 . ? 
C21 C22 1.365(15) . ? 
C21 H21A 0.9300 . ? 
C22 C23 1.402(14) . ? 
C22 H22A 0.9300 . ? 
C23 C24 1.433(14) . ? 
C24 H24A 0.9300 . ? 
C25 C26 1.481(15) . ? 
C25 H25A 0.9700 . ? 
C25 H25B 0.9700 . ? 
C26 C27 1.541(12) . ? 
C26 Eu2 3.266(9) 2_676 ? 
C26 H26A 0.9800 . ? 
C27 H27A 0.9700 . ? 
C27 H27B 0.9700 . ? 
C28 C29 1.446(13) . ? 
C28 H28A 0.9300 . ? 
C29 C30 1.412(12) . ? 
C29 C34 1.433(13) . ? 
C30 C31 1.357(15) . ? 
C30 H30A 0.9300 . ? 
C31 C32 1.386(16) . ? 
C31 H31A 0.9300 . ? 
C32 C33 1.372(13) . ? 
C32 H32A 0.9300 . ? 
C33 C34 1.420(13) . ? 
C33 H33A 0.9300 . ? 
C35 C36 1.48(2) . ? 
C35 H35A 0.9600 . ? 
C35 H35B 0.9600 . ? 
C35 H35C 0.9600 . ? 
C36 H36B 0.9700 . ? 
C36 H36A 0.9700 . ? 
C37 H37A 0.9600 . ? 
C37 H37B 0.9600 . ? 
C37 H37C 0.9600 . ? 
O12 C39 1.36(4) . ? 
O12 H12B 0.8200 . ? 
C38 C39 1.46(5) . ? 
C38 H38A 0.9600 . ? 
C38 H38B 0.9600 . ? 
C38 H38C 0.9600 . ? 
C39 H39A 0.9700 . ? 
C39 H39B 0.9700 . ? 
O13 C41 1.589(18) . ? 
O13 H13B 0.8200 . ? 
C40 C41 1.550(18) . ? 
C40 H40A 0.9600 . ? 
C40 H40B 0.9600 . ? 
C40 H40C 0.9600 . ? 
C41 H41A 0.9700 . ? 
C41 H41B 0.9700 . ? 
 
loop_ 
 _geom_angle_atom_site_label_1 
 _geom_angle_atom_site_label_2 
 _geom_angle_atom_site_label_3 
 _geom_angle 
 _geom_angle_site_symmetry_1 
 _geom_angle_site_symmetry_3 
 _geom_angle_publ_flag 
O3 Eu1 O5 81.0(2) . . ? 
O3 Eu1 O4 110.0(2) . . ? 
O5 Eu1 O4 134.0(2) . . ? 
O3 Eu1 O8 102.0(2) . . ? 
O5 Eu1 O8 70.4(2) . . ? 
O4 Eu1 O8 141.8(2) . . ? 
O3 Eu1 O7 157.7(2) . . ? 
O5 Eu1 O7 78.7(2) . . ? 
O4 Eu1 O7 78.5(2) . . ? 
O8 Eu1 O7 79.7(2) . . ? 
O3 Eu1 O2 140.3(2) . . ? 
O5 Eu1 O2 129.12(19) . . ? 
O4 Eu1 O2 70.0(2) . . ? 
O8 Eu1 O2 72.06(19) . . ? 
O7 Eu1 O2 61.7(2) . . ? 
O3 Eu1 N2 73.2(2) . . ? 
O5 Eu1 N2 135.2(2) . . ? 
O4 Eu1 N2 89.7(2) . . ? 
O8 Eu1 N2 79.8(2) . . ? 
O7 Eu1 N2 128.4(2) . . ? 
O2 Eu1 N2 67.0(2) . . ? 
O3 Eu1 N3 82.6(3) . . ? 
O5 Eu1 N3 67.3(2) . . ? 
O4 Eu1 N3 70.0(2) . . ? 
O8 Eu1 N3 136.2(2) . . ? 
O7 Eu1 N3 81.2(3) . . ? 
O2 Eu1 N3 129.5(2) . . ? 
N2 Eu1 N3 140.9(3) . . ? 
O3 Eu1 C26 72.7(3) . . ? 
O5 Eu1 C26 22.1(2) . . ? 
O4 Eu1 C26 116.5(2) . . ? 
O8 Eu1 C26 92.3(2) . . ? 
O7 Eu1 C26 85.1(2) . . ? 
O2 Eu1 C26 144.9(2) . . ? 
N2 Eu1 C26 142.5(3) . . ? 
N3 Eu1 C26 46.9(2) . . ? 
O3 Eu1 Eu2 85.89(18) . 2_676 ? 
O5 Eu1 Eu2 33.58(15) . 2_676 ? 
O4 Eu1 Eu2 159.77(17) . 2_676 ? 
O8 Eu1 Eu2 37.61(13) . 2_676 ? 
O7 Eu1 Eu2 82.29(14) . 2_676 ? 
O2 Eu1 Eu2 106.15(13) . 2_676 ? 
N2 Eu1 Eu2 107.38(17) . 2_676 ? 
N3 Eu1 Eu2 100.87(18) . 2_676 ? 
C26 Eu1 Eu2 54.95(16) . 2_676 ? 
O5 Eu2 O7 150.37(19) 2_676 . ? 
O5 Eu2 O8 70.7(2) 2_676 2_676 ? 
O7 Eu2 O8 80.2(2) . 2_676 ? 
O5 Eu2 O6 131.1(2) 2_676 2_676 ? 
O7 Eu2 O6 75.3(2) . 2_676 ? 
O8 Eu2 O6 138.0(2) 2_676 2_676 ? 
O5 Eu2 O2 134.0(2) 2_676 . ? 
O7 Eu2 O2 62.3(2) . . ? 
O8 Eu2 O2 127.77(18) 2_676 . ? 
O6 Eu2 O2 67.55(19) 2_676 . ? 
O5 Eu2 O10 76.0(2) 2_676 . ? 
O7 Eu2 O10 103.9(2) . . ? 
O8 Eu2 O10 78.5(2) 2_676 . ? 
O6 Eu2 O10 75.0(2) 2_676 . ? 
O2 Eu2 O10 142.2(2) . . ? 
O5 Eu2 O8 84.9(2) 2_676 . ? 
O7 Eu2 O8 78.9(2) . . ? 
O8 Eu2 O8 67.6(2) 2_676 . ? 
O6 Eu2 O8 137.27(19) 2_676 . ? 
O2 Eu2 O8 70.40(19) . . ? 
O10 Eu2 O8 145.1(2) . . ? 
O5 Eu2 N4 67.6(2) 2_676 2_676 ? 
O7 Eu2 N4 141.9(2) . 2_676 ? 
O8 Eu2 N4 137.7(2) 2_676 2_676 ? 
O6 Eu2 N4 71.3(2) 2_676 2_676 ? 
O2 Eu2 N4 87.8(2) . 2_676 ? 
O10 Eu2 N4 85.0(2) . 2_676 ? 
O8 Eu2 N4 114.6(2) . 2_676 ? 
O5 Eu2 C26 20.8(2) 2_676 2_676 ? 
O7 Eu2 C26 171.2(2) . 2_676 ? 
O8 Eu2 C26 91.3(2) 2_676 2_676 ? 
O6 Eu2 C26 113.0(2) 2_676 2_676 ? 
O2 Eu2 C26 122.7(2) . 2_676 ? 
O10 Eu2 C26 76.4(3) . 2_676 ? 
O8 Eu2 C26 95.7(2) . 2_676 ? 
N4 Eu2 C26 46.8(2) 2_676 2_676 ? 
O5 Eu2 Eu1 34.30(14) 2_676 2_676 ? 
O7 Eu2 Eu1 117.26(14) . 2_676 ? 
O8 Eu2 Eu1 37.13(14) 2_676 2_676 ? 
O6 Eu2 Eu1 143.46(14) 2_676 2_676 ? 
O2 Eu2 Eu1 148.96(14) . 2_676 ? 
O10 Eu2 Eu1 68.72(16) . 2_676 ? 
O8 Eu2 Eu1 78.99(13) . 2_676 ? 
N4 Eu2 Eu1 100.58(17) 2_676 2_676 ? 
C26 Eu2 Eu1 54.37(16) 2_676 2_676 ? 
O5 Eu2 Eu2 75.49(15) 2_676 2_676 ? 
O7 Eu2 Eu2 77.41(14) . 2_676 ? 
O8 Eu2 Eu2 34.30(13) 2_676 2_676 ? 
O6 Eu2 Eu2 152.75(14) 2_676 2_676 ? 
O2 Eu2 Eu2 99.14(13) . 2_676 ? 
O10 Eu2 Eu2 112.43(16) . 2_676 ? 
O8 Eu2 Eu2 33.27(13) . 2_676 ? 
N4 Eu2 Eu2 133.85(18) 2_676 2_676 ? 
C26 Eu2 Eu2 94.24(18) 2_676 2_676 ? 
Eu1 Eu2 Eu2 53.87(2) 2_676 2_676 ? 
O1 Eu3 O7 156.1(3) . . ? 
O1 Eu3 O6 100.1(2) . 2_676 ? 
O7 Eu3 O6 77.6(2) . 2_676 ? 
O1 Eu3 O4 115.2(2) . . ? 
O7 Eu3 O4 79.3(2) . . ? 
O6 Eu3 O4 136.4(2) 2_676 . ? 
O1 Eu3 O2 139.1(3) . . ? 
O7 Eu3 O2 62.5(2) . . ? 
O6 Eu3 O2 68.2(2) 2_676 . ? 
O4 Eu3 O2 68.5(2) . . ? 
O1 Eu3 N1 73.2(3) . . ? 
O7 Eu3 N1 130.1(2) . . ? 
O6 Eu3 N1 89.3(2) 2_676 . ? 
O4 Eu3 N1 78.2(2) . . ? 
O2 Eu3 N1 67.9(2) . . ? 
O1 Eu3 O11 78.3(3) . . ? 
O7 Eu3 O11 88.4(2) . . ? 
O6 Eu3 O11 140.3(3) 2_676 . ? 
O4 Eu3 O11 74.6(3) . . ? 
O2 Eu3 O11 136.1(2) . . ? 
N1 Eu3 O11 126.5(3) . . ? 
O1 Eu3 O9 83.1(3) . . ? 
O7 Eu3 O9 73.5(3) . . ? 
O6 Eu3 O9 72.9(3) 2_676 . ? 
O4 Eu3 O9 133.3(3) . . ? 
O2 Eu3 O9 125.8(2) . . ? 
N1 Eu3 O9 147.3(3) . . ? 
O11 Eu3 O9 67.5(3) . . ? 
C7 N1 C8 117.7(10) . . ? 
C7 N1 Eu3 129.9(8) . . ? 
C8 N1 Eu3 112.4(5) . . ? 
C11 N2 C10 116.8(8) . . ? 
C11 N2 Eu1 129.4(6) . . ? 
C10 N2 Eu1 113.7(5) . . ? 
C24 N3 C25 118.6(8) . . ? 
C24 N3 Eu1 128.2(7) . . ? 
C25 N3 Eu1 113.1(6) . . ? 
C28 N4 C27 117.3(8) . . ? 
C28 N4 Eu2 130.4(6) . 2_676 ? 
C27 N4 Eu2 108.6(5) . 2_676 ? 
C1 O1 Eu3 144.2(10) . . ? 
C9 O2 Eu1 121.5(5) . . ? 
C9 O2 Eu2 125.6(5) . . ? 
Eu1 O2 Eu2 94.13(19) . . ? 
C9 O2 Eu3 120.2(5) . . ? 
Eu1 O2 Eu3 93.0(2) . . ? 
Eu2 O2 Eu3 94.4(2) . . ? 
C17 O3 Eu1 136.0(6) . . ? 
C18 O4 Eu1 132.9(6) . . ? 
C18 O4 Eu3 122.9(6) . . ? 
Eu1 O4 Eu3 96.8(2) . . ? 
C26 O5 Eu2 124.7(5) . 2_676 ? 
C26 O5 Eu1 120.4(5) . . ? 
Eu2 O5 Eu1 112.1(2) 2_676 . ? 
C34 O6 Eu3 125.7(5) . 2_676 ? 
C34 O6 Eu2 136.1(5) . 2_676 ? 
Eu3 O6 Eu2 97.54(19) 2_676 2_676 ? 
Eu3 O7 Eu2 100.0(2) . . ? 
Eu3 O7 Eu1 96.8(2) . . ? 
Eu2 O7 Eu1 95.9(2) . . ? 
Eu3 O7 H7B 119.7 . . ? 
Eu2 O7 H7B 119.7 . . ? 
Eu1 O7 H7B 119.7 . . ? 
Eu1 O8 Eu2 105.3(2) . 2_676 ? 
Eu1 O8 Eu2 94.6(2) . . ? 
Eu2 O8 Eu2 112.4(2) 2_676 . ? 
Eu1 O8 H8D 114.2 . . ? 
Eu2 O8 H8D 114.2 2_676 . ? 
Eu2 O8 H8D 114.2 . . ? 
C36 O10 Eu2 136.4(7) . . ? 
C36 O10 H10C 109.5 . . ? 
Eu2 O10 H10C 97.2 . . ? 
C37 O11 Eu3 128.8(9) . . ? 
C37 O11 H11B 109.5 . . ? 
Eu3 O11 H11B 101.2 . . ? 
O1 C1 C2 122.3(16) . . ? 
O1 C1 C6 120.7(12) . . ? 
C2 C1 C6 117.0(13) . . ? 
C3 C2 C1 125.6(19) . . ? 
C3 C2 H2A 117.2 . . ? 
C1 C2 H2A 117.2 . . ? 
C2 C3 C4 117.6(15) . . ? 
C2 C3 H3A 121.2 . . ? 
C4 C3 H3A 121.2 . . ? 
C3 C4 C5 121.5(12) . . ? 
C3 C4 H4A 119.3 . . ? 
C5 C4 H4A 119.3 . . ? 
C4 C5 C6 117.3(15) . . ? 
C4 C5 H5A 121.4 . . ? 
C6 C5 H5A 121.4 . . ? 
C1 C6 C5 121.0(12) . . ? 
C1 C6 C7 125.5(10) . . ? 
C5 C6 C7 113.5(14) . . ? 
N1 C7 C6 124.2(12) . . ? 
N1 C7 H7A 117.9 . . ? 
C6 C7 H7A 117.9 . . ? 
N1 C8 C9 112.1(8) . . ? 
N1 C8 H8A 109.2 . . ? 
C9 C8 H8A 109.2 . . ? 
N1 C8 H8B 109.2 . . ? 
C9 C8 H8B 109.2 . . ? 
H8A C8 H8B 107.9 . . ? 
O2 C9 C10 108.5(6) . . ? 
O2 C9 C8 108.8(8) . . ? 
C10 C9 C8 112.7(8) . . ? 
O2 C9 H9A 108.9 . . ? 
C10 C9 H9A 108.9 . . ? 
C8 C9 H9A 108.9 . . ? 
N2 C10 C9 110.4(7) . . ? 
N2 C10 H10A 109.6 . . ? 
C9 C10 H10A 109.6 . . ? 
N2 C10 H10B 109.6 . . ? 
C9 C10 H10B 109.6 . . ? 
H10A C10 H10B 108.1 . . ? 
N2 C11 C12 125.8(8) . . ? 
N2 C11 H11A 117.1 . . ? 
C12 C11 H11A 117.1 . . ? 
C13 C12 C17 120.2(8) . . ? 
C13 C12 C11 116.2(9) . . ? 
C17 C12 C11 123.6(8) . . ? 
C14 C13 C12 121.8(10) . . ? 
C14 C13 H13A 119.1 . . ? 
C12 C13 H13A 119.1 . . ? 
C13 C14 C15 117.9(9) . . ? 
C13 C14 H14A 121.1 . . ? 
C15 C14 H14A 121.1 . . ? 
C16 C15 C14 120.7(9) . . ? 
C16 C15 H15A 119.7 . . ? 
C14 C15 H15A 119.7 . . ? 
C15 C16 C17 122.7(10) . . ? 
C15 C16 H16A 118.6 . . ? 
C17 C16 H16A 118.6 . . ? 
O3 C17 C16 120.2(9) . . ? 
O3 C17 C12 123.1(8) . . ? 
C16 C17 C12 116.7(8) . . ? 
O4 C18 C23 123.2(9) . . ? 
O4 C18 C19 117.8(9) . . ? 
C23 C18 C19 118.9(9) . . ? 
C20 C19 C18 120.1(10) . . ? 
C20 C19 H19A 120.0 . . ? 
C18 C19 H19A 120.0 . . ? 
C19 C20 C21 120.6(11) . . ? 
C19 C20 H20A 119.7 . . ? 
C21 C20 H20A 119.7 . . ? 
C22 C21 C20 119.4(10) . . ? 
C22 C21 H21A 120.3 . . ? 
C20 C21 H21A 120.3 . . ? 
C21 C22 C23 121.7(11) . . ? 
C21 C22 H22A 119.2 . . ? 
C23 C22 H22A 119.2 . . ? 
C18 C23 C22 119.3(9) . . ? 
C18 C23 C24 123.0(9) . . ? 
C22 C23 C24 117.7(9) . . ? 
N3 C24 C23 127.0(9) . . ? 
N3 C24 H24A 116.5 . . ? 
C23 C24 H24A 116.5 . . ? 
N3 C25 C26 107.7(9) . . ? 
N3 C25 H25A 110.2 . . ? 
C26 C25 H25A 110.2 . . ? 
N3 C25 H25B 110.2 . . ? 
C26 C25 H25B 110.2 . . ? 
H25A C25 H25B 108.5 . . ? 
O5 C26 C25 110.9(8) . . ? 
O5 C26 C27 106.8(7) . . ? 
C25 C26 C27 113.6(9) . . ? 
O5 C26 Eu1 37.5(3) . . ? 
C25 C26 Eu1 83.7(5) . . ? 
C27 C26 Eu1 143.6(6) . . ? 
O5 C26 Eu2 34.5(4) . 2_676 ? 
C25 C26 Eu2 140.3(7) . 2_676 ? 
C27 C26 Eu2 76.6(5) . 2_676 ? 
Eu1 C26 Eu2 70.68(18) . 2_676 ? 
O5 C26 H26A 108.5 . . ? 
C25 C26 H26A 108.5 . . ? 
C27 C26 H26A 108.5 . . ? 
Eu1 C26 H26A 94.5 . . ? 
Eu2 C26 H26A 103.5 2_676 . ? 
N4 C27 C26 105.9(7) . . ? 
N4 C27 H27A 110.6 . . ? 
C26 C27 H27A 110.6 . . ? 
N4 C27 H27B 110.6 . . ? 
C26 C27 H27B 110.6 . . ? 
H27A C27 H27B 108.7 . . ? 
N4 C28 C29 128.5(8) . . ? 
N4 C28 H28A 115.7 . . ? 
C29 C28 H28A 115.7 . . ? 
C30 C29 C34 119.2(9) . . ? 
C30 C29 C28 116.7(9) . . ? 
C34 C29 C28 124.1(8) . . ? 
C31 C30 C29 121.6(10) . . ? 
C31 C30 H30A 119.2 . . ? 
C29 C30 H30A 119.2 . . ? 
C30 C31 C32 119.7(9) . . ? 
C30 C31 H31A 120.2 . . ? 
C32 C31 H31A 120.2 . . ? 
C33 C32 C31 121.3(10) . . ? 
C33 C32 H32A 119.3 . . ? 
C31 C32 H32A 119.3 . . ? 
C32 C33 C34 121.0(10) . . ? 
C32 C33 H33A 119.5 . . ? 
C34 C33 H33A 119.5 . . ? 
O6 C34 C33 121.4(8) . . ? 
O6 C34 C29 121.4(8) . . ? 
C33 C34 C29 117.2(8) . . ? 
C36 C35 H35A 109.5 . . ? 
C36 C35 H35B 109.5 . . ? 
H35A C35 H35B 109.5 . . ? 
C36 C35 H35C 109.5 . . ? 
H35A C35 H35C 109.5 . . ? 
H35B C35 H35C 109.5 . . ? 
O10 C36 C35 116.1(13) . . ? 
O10 C36 H36B 108.3 . . ? 
C35 C36 H36B 108.3 . . ? 
O10 C36 H36A 108.3 . . ? 
C35 C36 H36A 108.3 . . ? 
H36B C36 H36A 107.4 . . ? 
O11 C37 H37A 109.5 . . ? 
O11 C37 H37B 109.5 . . ? 
H37A C37 H37B 109.5 . . ? 
O11 C37 H37C 109.5 . . ? 
H37A C37 H37C 109.5 . . ? 
H37B C37 H37C 109.5 . . ? 
C39 O12 H12B 109.5 . . ? 
C39 C38 H38A 109.5 . . ? 
C39 C38 H38B 109.5 . . ? 
H38A C38 H38B 109.5 . . ? 
C39 C38 H38C 109.5 . . ? 
H38A C38 H38C 109.5 . . ? 
H38B C38 H38C 109.5 . . ? 
O12 C39 C38 115(3) . . ? 
O12 C39 H39A 108.6 . . ? 
C38 C39 H39A 108.6 . . ? 
O12 C39 H39B 108.6 . . ? 
C38 C39 H39B 108.6 . . ? 
H39A C39 H39B 107.6 . . ? 
C41 O13 H13B 109.5 . . ? 
C41 C40 H40A 109.5 . . ? 
C41 C40 H40B 109.5 . . ? 
H40A C40 H40B 109.5 . . ? 
C41 C40 H40C 109.5 . . ? 
H40A C40 H40C 109.5 . . ? 
H40B C40 H40C 109.5 . . ? 
C40 C41 O13 114(2) . . ? 
C40 C41 H41A 108.7 . . ? 
O13 C41 H41A 108.7 . . ? 
C40 C41 H41B 108.7 . . ? 
O13 C41 H41B 108.7 . . ? 
H41A C41 H41B 107.6 . . ? 
 
_diffrn_measured_fraction_theta_max    0.996 
_diffrn_reflns_theta_full              25.00 
_diffrn_measured_fraction_theta_full   0.996 
_refine_diff_density_max    4.008 
_refine_diff_density_min   -4.007 
_refine_diff_density_rms    0.172 

#===END
 
data_complex-4 
 
_audit_creation_method            SHELXL-97 
_chemical_name_systematic 
; 
 ? 
; 
_chemical_name_common             ? 
_chemical_melting_point           ? 
_chemical_formula_moiety          
 '2(C72 H76 Er6 N8 O20), 2(C2 H6 O), 4(C H4 O), 4(Cl), O' 
_chemical_formula_sum 
 'C152 H180 Cl4 Er12 N16 O47' 
_chemical_formula_weight          5132.04 
 
loop_ 
 _atom_type_symbol 
 _atom_type_description 
 _atom_type_scat_dispersion_real 
 _atom_type_scat_dispersion_imag 
 _atom_type_scat_source 
 'C'  'C'   0.0033   0.0016 
 'International Tables Vol C Tables 4.2.6.8 and 6.1.1.4' 
 'H'  'H'   0.0000   0.0000 
 'International Tables Vol C Tables 4.2.6.8 and 6.1.1.4' 
 'N'  'N'   0.0061   0.0033 
 'International Tables Vol C Tables 4.2.6.8 and 6.1.1.4' 
 'O'  'O'   0.0106   0.0060 
 'International Tables Vol C Tables 4.2.6.8 and 6.1.1.4' 
 'Er'  'Er'  -0.2586   4.9576 
 'International Tables Vol C Tables 4.2.6.8 and 6.1.1.4' 
 'Cl'  'Cl'   0.1484   0.1585 
 'International Tables Vol C Tables 4.2.6.8 and 6.1.1.4' 
 
_symmetry_cell_setting            Triclinic 
_symmetry_space_group_name_H-M    P-1 
 
loop_ 
 _symmetry_equiv_pos_as_xyz 
 'x, y, z' 
 '-x, -y, -z' 
 
_cell_length_a                    15.375(3) 
_cell_length_b                    18.622(4) 
_cell_length_c                    19.228(4) 
_cell_angle_alpha                 71.69(3) 
_cell_angle_beta                  67.98(2) 
_cell_angle_gamma                 83.86(3) 
_cell_volume                      4844.9(19) 
_cell_formula_units_Z             1 
_cell_measurement_temperature     223(2) 
_cell_measurement_reflns_used     11997 
_cell_measurement_theta_min       2.91 
_cell_measurement_theta_max       30.51 
 
_exptl_crystal_description        Block 
_exptl_crystal_colour             Yellow 
_exptl_crystal_size_max           0.17 
_exptl_crystal_size_mid           0.15 
_exptl_crystal_size_min           0.10 
_exptl_crystal_density_meas       ? 
_exptl_crystal_density_diffrn     1.759 
_exptl_crystal_density_method     'not measured' 
_exptl_crystal_F_000              2464 
_exptl_absorpt_coefficient_mu     5.259 
_exptl_absorpt_correction_type    'Multi-scan' 
_exptl_absorpt_correction_T_min   0.8135 
_exptl_absorpt_correction_T_max   1.0000 
_exptl_absorpt_process_details    
'DENZO and Scalepack (Otwinoski and Minor, 1997)'
 
_exptl_special_details 
; 
 ? 
; 
 
_diffrn_ambient_temperature       223(1) 
_diffrn_radiation_wavelength      0.710747 
_diffrn_radiation_type            MoK\a 
_diffrn_radiation_source          'Sealed tube' 
_diffrn_radiation_monochromator   'Graphite Monochromator' 
_diffrn_measurement_device_type   'Mercury2 (2x2 bin mode)' 
_diffrn_measurement_method        'dtprofit.ref' 
_diffrn_detector_area_resol_mean  13.6612 
_diffrn_standards_number          ? 
_diffrn_standards_interval_count  ? 
_diffrn_standards_interval_time   ? 
_diffrn_standards_decay_%         ? 
_diffrn_reflns_number             25678 
_diffrn_reflns_av_R_equivalents   0.0437 
_diffrn_reflns_av_sigmaI/netI     0.0895 
_diffrn_reflns_limit_h_min        -18 
_diffrn_reflns_limit_h_max        18 
_diffrn_reflns_limit_k_min        -21 
_diffrn_reflns_limit_k_max        22 
_diffrn_reflns_limit_l_min        -22 
_diffrn_reflns_limit_l_max        21 
_diffrn_reflns_theta_min          2.99 
_diffrn_reflns_theta_max          25.00 
_reflns_number_total              16986 
_reflns_number_gt                 12060 
_reflns_threshold_expression      >2sigma(I) 
 
_publ_section_acknowledgements
;
The data were collected using instrumentation purchased with funds provided
by the National Science Foundation Grant No. 0741973.
;

_publ_section_references
;
Altomare A., Burla M.C., Camalli M., Cascarano G.L., Giacovazzo C., 
Guagliardi A., Moliterni A.G.G., Polidori G.,Spagna R. Sir97.  
(1999) J. Appl. Cryst. 32, 115-119.

Otwinowski, Z. and Minor, W.  (1997).  Methods in Enzymology,
276, Macromolecular Crystallography, part A, 307-326, C. W. Carter,
Jr. and R. M. Sweets, Eds., Academic Press.

Sheldrick, G. M.  (1998).  SHELXTL/PC.  Release 5.10.  Siemens 
Analytical X-ray Instruments, Inc., Madison, WI, USA.


;
_computing_data_collection        'Collect software, Nonius B.V. 1998'
_computing_cell_refinement        'Collect software, Nonius B.V. 1998'
_computing_data_reduction         
;
DENZO and Scalepack (Otwinoski and Minor, 1997)
;
_computing_structure_solution     
;

SIR97 - Altomare A., Burla M.C., Camalli M., Cascarano G.L., Giacovazzo C., 
Guagliardi A., Moliterni A.G.G., Polidori G.,Spagna R.
;
_computing_structure_refinement   'XL SHELXTL/PC, Siemens Analytical'
_computing_molecular_graphics     'XP SHELXTL/PC, Siemens Analytical' 
_computing_publication_material   ? 


  
_refine_special_details 
; 
 Refinement of F^2^ against ALL reflections.  The weighted R-factor wR and 
 goodness of fit S are based on F^2^, conventional R-factors R are based 
 on F, with F set to zero for negative F^2^. The threshold expression of 
 F^2^ > 2sigma(F^2^) is used only for calculating R-factors(gt) etc. and is 
 not relevant to the choice of reflections for refinement.  R-factors based 
 on F^2^ are statistically about twice as large as those based on F, and R- 
 factors based on ALL data will be even larger. 

 Restraints 712: The bond lengths of the uncoordinate MeOH are fixed; ISOR 
 was applied to all non-hydrogen atoms to allow their Uij components approximate 
 to isotropic behavior.

 Hydrogen atoms of water molecules were not added.

;
 
_refine_ls_structure_factor_coef  Fsqd  
_refine_ls_matrix_type            full 
_refine_ls_weighting_scheme       calc  
_refine_ls_weighting_details 
 'calc w=1/[\s^2^(Fo^2^)+(0.0439P)^2^+59.9061P] where P=(Fo^2^+2Fc^2^)/3' 
_atom_sites_solution_primary      direct 
_atom_sites_solution_secondary    difmap 
_atom_sites_solution_hydrogens    geom 
_refine_ls_hydrogen_treatment     constr 
_refine_ls_extinction_method      none 
_refine_ls_extinction_coef        ? 
_refine_ls_number_reflns          16986 
_refine_ls_number_parameters      1063 
_refine_ls_number_restraints      712 
_refine_ls_R_factor_all           0.1038 
_refine_ls_R_factor_gt            0.0626 
_refine_ls_wR_factor_ref          0.1365 
_refine_ls_wR_factor_gt           0.1210 
_refine_ls_goodness_of_fit_ref    1.023 
_refine_ls_restrained_S_all       1.024 
_refine_ls_shift/su_max           0.009 
_refine_ls_shift/su_mean          0.001 
 
loop_ 
 _atom_site_label 
 _atom_site_type_symbol 
 _atom_site_fract_x 
 _atom_site_fract_y 
 _atom_site_fract_z 
 _atom_site_U_iso_or_equiv 
 _atom_site_adp_type 
 _atom_site_occupancy 
 _atom_site_symmetry_multiplicity 
 _atom_site_calc_flag 
 _atom_site_refinement_flags 
 _atom_site_disorder_assembly 
 _atom_site_disorder_group 
Er1 Er 0.90225(2) 0.495078(19) 0.102451(18) 0.03020(9) Uani 1 1 d U . . 
Er2 Er 1.13703(2) 0.528527(19) 0.072592(18) 0.03026(9) Uani 1 1 d U . . 
Er3 Er 0.95583(2) 0.58924(2) 0.218073(19) 0.03778(9) Uani 1 1 d U . . 
Er4 Er 0.56019(2) 0.02554(2) 0.38391(2) 0.03681(10) Uani 1 1 d U . . 
Er5 Er 0.51820(2) 0.16077(2) 0.50575(2) 0.03600(9) Uani 1 1 d U . . 
Er6 Er 0.50151(3) 0.09548(2) 0.70332(2) 0.04303(10) Uani 1 1 d U . . 
Cl1 Cl 0.97596(19) 0.78290(15) -0.00277(15) 0.0696(8) Uani 1 1 d U . . 
Cl2 Cl 0.78500(18) 0.00998(16) 0.57577(17) 0.0746(8) Uani 1 1 d U . . 
O1 O 1.1730(3) 0.4615(3) -0.2168(3) 0.0320(13) Uani 1 1 d U . . 
O2 O 1.1467(3) 0.5826(3) -0.0546(3) 0.0300(12) Uani 1 1 d U . . 
O3 O 1.1170(3) 0.5861(3) 0.1714(3) 0.0343(13) Uani 1 1 d U . . 
O4 O 1.2789(4) 0.4837(3) 0.0128(3) 0.0423(15) Uani 1 1 d U . . 
O5 O 1.0008(3) 0.4752(3) 0.1838(3) 0.0309(13) Uani 1 1 d U . . 
O6 O 0.9334(4) 0.6348(3) 0.3156(3) 0.0516(16) Uani 1 1 d U . . 
O7 O 0.5722(4) 0.0214(3) 0.2561(3) 0.0402(14) Uani 1 1 d U . . 
O8 O 0.6261(3) 0.1026(3) 0.4193(3) 0.0390(14) Uani 1 1 d U . . 
O9 O 0.5377(3) 0.2063(3) 0.6008(3) 0.0363(13) Uani 1 1 d U . . 
O10 O 0.5075(4) 0.2419(3) 0.3903(3) 0.0495(16) Uani 1 1 d U . . 
O11 O 0.4020(3) 0.1034(3) 0.6306(3) 0.0314(13) Uani 1 1 d U . . 
O12 O 0.5080(4) 0.1305(3) 0.7984(3) 0.0490(15) Uani 1 1 d U . . 
O13 O 1.0566(3) 0.4548(3) 0.0361(2) 0.0272(12) Uani 1 1 d U . . 
H13B H 1.0664 0.4003 0.0544 0.033 Uiso 1 1 calc R . . 
O14 O 0.9905(3) 0.5969(3) 0.0866(3) 0.0274(12) Uani 1 1 d U . . 
H14B H 0.9888 0.6458 0.0483 0.033 Uiso 1 1 calc R . . 
O15 O 0.4474(3) 0.0630(3) 0.4925(3) 0.0322(13) Uani 1 1 d U . . 
H15B H 0.3860 0.0760 0.4877 0.039 Uiso 1 1 calc R . . 
O16 O 0.5634(3) 0.0513(3) 0.5935(3) 0.0313(13) Uani 1 1 d U . . 
H16B H 0.6280 0.0330 0.5778 0.038 Uiso 1 1 calc R . . 
O17 O 0.9184(7) 0.7150(4) 0.1697(5) 0.103(3) Uani 1 1 d U . . 
O18 O 0.6337(6) 0.0333(6) 0.7209(5) 0.125(3) Uani 1 1 d U . . 
O19 O 0.7598(3) 0.5552(3) 0.0951(3) 0.0371(14) Uani 1 1 d U . . 
H19C H 0.7607 0.5475 0.0551 0.044 Uiso 1 1 calc R . . 
O20 O 0.5051(4) 0.1409(3) 0.3190(3) 0.0522(16) Uani 1 1 d U . . 
H20C H 0.4783 0.1559 0.3575 0.063 Uiso 1 1 calc R . . 
N1 N 1.2043(4) 0.6079(4) -0.2069(3) 0.0342(16) Uani 1 1 d U . . 
N2 N 1.2259(5) 0.6486(4) 0.0138(4) 0.054(2) Uani 1 1 d U . . 
N3 N 1.1767(4) 0.4246(4) 0.1745(3) 0.0327(16) Uani 1 1 d U . . 
N4 N 0.9283(4) 0.4805(4) 0.3368(3) 0.0375(17) Uani 1 1 d U . . 
N5 N 0.7213(5) 0.0721(4) 0.2837(4) 0.046(2) Uani 1 1 d U . . 
N6 N 0.6767(5) 0.2181(4) 0.4526(4) 0.057(2) Uani 1 1 d U . . 
N7 N 0.3802(4) 0.2450(4) 0.5397(4) 0.0414(18) Uani 1 1 d U . . 
N8 N 0.3385(4) 0.1233(4) 0.7789(4) 0.0399(17) Uani 1 1 d U . . 
C1 C 1.2536(5) 0.4765(4) -0.2777(4) 0.036(2) Uani 1 1 d U . . 
C2 C 1.2875(5) 0.4262(5) -0.3221(4) 0.042(2) Uani 1 1 d U . . 
H2A H 1.2525 0.3832 -0.3101 0.050 Uiso 1 1 calc R . . 
C3 C 1.3737(6) 0.4399(5) -0.3846(5) 0.053(2) Uani 1 1 d U . . 
H3A H 1.3957 0.4058 -0.4137 0.064 Uiso 1 1 calc R . . 
C4 C 1.4260(6) 0.5025(6) -0.4036(5) 0.058(3) Uani 1 1 d U . . 
H4A H 1.4849 0.5097 -0.4434 0.070 Uiso 1 1 calc R . . 
C5 C 1.3919(6) 0.5539(5) -0.3642(5) 0.051(2) Uani 1 1 d U . . 
H5A H 1.4273 0.5975 -0.3795 0.061 Uiso 1 1 calc R . . 
C6 C 1.3058(5) 0.5449(5) -0.3014(4) 0.039(2) Uani 1 1 d U . . 
C7 C 1.2781(5) 0.6052(4) -0.2658(5) 0.040(2) Uani 1 1 d U . . 
H7A H 1.3185 0.6468 -0.2881 0.048 Uiso 1 1 calc R . . 
C8 C 1.1944(6) 0.6759(4) -0.1821(4) 0.045(2) Uani 1 1 d U . . 
H8A H 1.2467 0.7107 -0.2155 0.054 Uiso 1 1 calc R . . 
H8B H 1.1364 0.7016 -0.1830 0.054 Uiso 1 1 calc R . . 
C9 C 1.1939(6) 0.6465(6) -0.1027(6) 0.102(4) Uani 1 1 d DU . . 
H9A H 1.2500 0.6171 -0.1209 0.122 Uiso 1 1 calc R . . 
C10 C 1.2428(8) 0.6817(7) -0.0668(7) 0.115(4) Uani 1 1 d DU . . 
H10B H 1.3098 0.6807 -0.0953 0.137 Uiso 1 1 calc R . . 
H10A H 1.2248 0.7344 -0.0750 0.137 Uiso 1 1 calc R . . 
C11 C 1.2616(5) 0.6860(5) 0.0408(5) 0.046(2) Uani 1 1 d U . . 
H11A H 1.2984 0.7280 0.0056 0.055 Uiso 1 1 calc R . . 
C12 C 1.2497(5) 0.6685(4) 0.1223(5) 0.038(2) Uani 1 1 d U . . 
C13 C 1.3121(6) 0.7032(5) 0.1404(5) 0.053(2) Uani 1 1 d U . . 
H13A H 1.3579 0.7361 0.0995 0.063 Uiso 1 1 calc R . . 
C14 C 1.3080(6) 0.6905(5) 0.2154(5) 0.056(2) Uani 1 1 d U . . 
H14A H 1.3512 0.7130 0.2255 0.067 Uiso 1 1 calc R . . 
C15 C 1.2384(6) 0.6437(5) 0.2752(5) 0.056(2) Uani 1 1 d U . . 
H15A H 1.2343 0.6350 0.3267 0.067 Uiso 1 1 calc R . . 
C16 C 1.1739(6) 0.6089(5) 0.2610(5) 0.049(2) Uani 1 1 d U . . 
H16A H 1.1269 0.5778 0.3028 0.058 Uiso 1 1 calc R . . 
C17 C 1.1796(5) 0.6209(4) 0.1835(4) 0.0310(18) Uani 1 1 d U . . 
C18 C 1.3467(5) 0.4422(4) 0.0290(4) 0.037(2) Uani 1 1 d U . . 
C19 C 1.4368(6) 0.4455(5) -0.0313(5) 0.051(2) Uani 1 1 d U . . 
H19A H 1.4462 0.4781 -0.0814 0.061 Uiso 1 1 calc R . . 
C20 C 1.5087(6) 0.4029(6) -0.0181(6) 0.058(3) Uani 1 1 d U . . 
H20A H 1.5668 0.4087 -0.0587 0.070 Uiso 1 1 calc R . . 
C21 C 1.4989(7) 0.3510(6) 0.0534(6) 0.067(3) Uani 1 1 d U . . 
H21A H 1.5473 0.3186 0.0606 0.080 Uiso 1 1 calc R . . 
C22 C 1.4134(7) 0.3489(6) 0.1145(6) 0.062(3) Uani 1 1 d U . . 
H22A H 1.4072 0.3171 0.1643 0.075 Uiso 1 1 calc R . . 
C23 C 1.3374(6) 0.3918(5) 0.1049(5) 0.047(2) Uani 1 1 d U . . 
C24 C 1.2515(6) 0.3875(5) 0.1720(5) 0.044(2) Uani 1 1 d U . . 
H24A H 1.2511 0.3533 0.2193 0.053 Uiso 1 1 calc R . . 
C25 C 1.1023(5) 0.4088(5) 0.2520(4) 0.040(2) Uani 1 1 d U . . 
H25A H 1.1036 0.4468 0.2764 0.048 Uiso 1 1 calc R . . 
H25B H 1.1122 0.3598 0.2853 0.048 Uiso 1 1 calc R . . 
C26 C 1.0073(5) 0.4091(4) 0.2442(4) 0.0313(19) Uani 1 1 d U . . 
H26A H 1.0009 0.3640 0.2305 0.038 Uiso 1 1 calc R . . 
C27 C 0.9295(5) 0.4093(4) 0.3213(4) 0.039(2) Uani 1 1 d U . . 
H27B H 0.8696 0.4009 0.3191 0.047 Uiso 1 1 calc R . . 
H27A H 0.9390 0.3684 0.3637 0.047 Uiso 1 1 calc R . . 
C28 C 0.9132(5) 0.4782(5) 0.4082(5) 0.043(2) Uani 1 1 d U . . 
H28A H 0.9055 0.4305 0.4447 0.051 Uiso 1 1 calc R . . 
C29 C 0.9072(5) 0.5413(5) 0.4372(4) 0.045(2) Uani 1 1 d U . . 
C30 C 0.8906(6) 0.5253(6) 0.5187(5) 0.053(2) Uani 1 1 d U . . 
H30A H 0.8810 0.4755 0.5507 0.064 Uiso 1 1 calc R . . 
C31 C 0.8886(7) 0.5808(6) 0.5503(5) 0.064(3) Uani 1 1 d U . . 
H31A H 0.8787 0.5692 0.6034 0.077 Uiso 1 1 calc R . . 
C32 C 0.9011(7) 0.6529(6) 0.5048(5) 0.065(3) Uani 1 1 d U . . 
H32A H 0.8992 0.6909 0.5272 0.078 Uiso 1 1 calc R . . 
C33 C 0.9169(6) 0.6727(6) 0.4239(5) 0.057(3) Uani 1 1 d U . . 
H33A H 0.9262 0.7230 0.3930 0.068 Uiso 1 1 calc R . . 
C34 C 0.9181(5) 0.6153(5) 0.3910(4) 0.043(2) Uani 1 1 d U . . 
C35 C 0.6236(6) 0.0509(5) 0.1808(5) 0.053(3) Uani 1 1 d U . . 
C36 C 0.5919(7) 0.0460(6) 0.1217(5) 0.061(3) Uani 1 1 d U . . 
H36A H 0.5337 0.0244 0.1356 0.073 Uiso 1 1 calc R . . 
C37 C 0.6483(8) 0.0736(7) 0.0439(7) 0.082(3) Uani 1 1 d U . . 
H37A H 0.6274 0.0696 0.0057 0.099 Uiso 1 1 calc R . . 
C38 C 0.7326(8) 0.1061(7) 0.0209(7) 0.086(4) Uani 1 1 d U . . 
H38A H 0.7688 0.1228 -0.0324 0.103 Uiso 1 1 calc R . . 
C39 C 0.7657(8) 0.1152(6) 0.0740(6) 0.076(3) Uani 1 1 d U . . 
H39A H 0.8233 0.1390 0.0574 0.091 Uiso 1 1 calc R . . 
C40 C 0.7101(6) 0.0873(5) 0.1568(5) 0.052(3) Uani 1 1 d U . . 
C41 C 0.7521(7) 0.0964(5) 0.2104(6) 0.058(3) Uani 1 1 d U . . 
H41A H 0.8085 0.1234 0.1872 0.070 Uiso 1 1 calc R . . 
C42 C 0.7768(6) 0.0895(5) 0.3245(6) 0.061(3) Uani 1 1 d U . . 
H42A H 0.8321 0.1196 0.2875 0.074 Uiso 1 1 calc R . . 
H42B H 0.7959 0.0437 0.3563 0.074 Uiso 1 1 calc R . . 
C43 C 0.7098(7) 0.1328(5) 0.3738(7) 0.102(4) Uani 1 1 d DU . . 
H43A H 0.6912 0.1687 0.3323 0.122 Uiso 1 1 calc R . . 
C44 C 0.7489(8) 0.1894(6) 0.3951(7) 0.101(4) Uani 1 1 d DU . . 
H44B H 0.7970 0.1658 0.4160 0.121 Uiso 1 1 calc R . . 
H44A H 0.7779 0.2309 0.3484 0.121 Uiso 1 1 calc R . . 
C45 C 0.7036(6) 0.2730(5) 0.4647(5) 0.053(2) Uani 1 1 d U . . 
H45A H 0.7622 0.2941 0.4308 0.064 Uiso 1 1 calc R . . 
C46 C 0.6507(6) 0.3065(5) 0.5275(5) 0.045(2) Uani 1 1 d U . . 
C47 C 0.6852(6) 0.3745(5) 0.5238(6) 0.059(3) Uani 1 1 d U . . 
H47A H 0.7361 0.3981 0.4798 0.071 Uiso 1 1 calc R . . 
C48 C 0.6469(6) 0.4076(5) 0.5823(5) 0.059(2) Uani 1 1 d U . . 
H48A H 0.6700 0.4538 0.5774 0.071 Uiso 1 1 calc R . . 
C49 C 0.5759(6) 0.3728(5) 0.6466(5) 0.058(2) Uani 1 1 d U . . 
H49A H 0.5504 0.3945 0.6874 0.070 Uiso 1 1 calc R . . 
C50 C 0.5394(6) 0.3048(5) 0.6537(5) 0.052(2) Uani 1 1 d U . . 
H50A H 0.4900 0.2813 0.6991 0.062 Uiso 1 1 calc R . . 
C51 C 0.5759(5) 0.2719(4) 0.5939(4) 0.0297(18) Uani 1 1 d U . . 
C52 C 0.4672(6) 0.3026(5) 0.3643(5) 0.049(2) Uani 1 1 d U . . 
C53 C 0.4995(6) 0.3379(5) 0.2824(5) 0.055(3) Uani 1 1 d U . . 
H53A H 0.5478 0.3170 0.2485 0.066 Uiso 1 1 calc R . . 
C54 C 0.4569(7) 0.4058(6) 0.2530(6) 0.066(3) Uani 1 1 d U . . 
H54A H 0.4779 0.4293 0.1991 0.079 Uiso 1 1 calc R . . 
C55 C 0.3870(7) 0.4371(6) 0.3008(6) 0.066(3) Uani 1 1 d U . . 
H55A H 0.3609 0.4822 0.2797 0.079 Uiso 1 1 calc R . . 
C56 C 0.3543(6) 0.4038(5) 0.3792(6) 0.058(3) Uani 1 1 d U . . 
H56A H 0.3055 0.4262 0.4113 0.069 Uiso 1 1 calc R . . 
C57 C 0.3923(6) 0.3360(4) 0.4134(5) 0.042(2) Uani 1 1 d U . . 
C58 C 0.3520(5) 0.3029(5) 0.4973(5) 0.044(2) Uani 1 1 d U . . 
H58A H 0.2991 0.3265 0.5237 0.053 Uiso 1 1 calc R . . 
C59 C 0.3252(6) 0.2225(5) 0.6235(5) 0.043(2) Uani 1 1 d U . . 
H59A H 0.2637 0.2451 0.6325 0.052 Uiso 1 1 calc R . . 
H59B H 0.3558 0.2406 0.6507 0.052 Uiso 1 1 calc R . . 
C60 C 0.3147(5) 0.1368(5) 0.6559(5) 0.039(2) Uani 1 1 d U . . 
H60A H 0.2731 0.1203 0.6356 0.047 Uiso 1 1 calc R . . 
C61 C 0.2720(5) 0.1120(5) 0.7447(5) 0.043(2) Uani 1 1 d U . . 
H61A H 0.2158 0.1409 0.7616 0.051 Uiso 1 1 calc R . . 
H61B H 0.2542 0.0590 0.7634 0.051 Uiso 1 1 calc R . . 
C62 C 0.3058(6) 0.1424(5) 0.8412(5) 0.046(2) Uani 1 1 d U . . 
H62A H 0.2416 0.1510 0.8595 0.055 Uiso 1 1 calc R . . 
C63 C 0.3572(7) 0.1525(5) 0.8882(5) 0.052(2) Uani 1 1 d U . . 
C64 C 0.3075(7) 0.1697(6) 0.9566(5) 0.066(3) Uani 1 1 d U . . 
H64A H 0.2425 0.1730 0.9729 0.079 Uiso 1 1 calc R . . 
C65 C 0.3532(7) 0.1822(6) 1.0022(6) 0.069(3) Uani 1 1 d U . . 
H65A H 0.3188 0.1954 1.0477 0.082 Uiso 1 1 calc R . . 
C66 C 0.4480(7) 0.1752(6) 0.9804(6) 0.065(3) Uani 1 1 d U . . 
H66A H 0.4784 0.1816 1.0117 0.078 Uiso 1 1 calc R . . 
C67 C 0.4972(6) 0.1589(5) 0.9130(5) 0.052(2) Uani 1 1 d U . . 
H67A H 0.5621 0.1550 0.8983 0.062 Uiso 1 1 calc R . . 
C68 C 0.4549(6) 0.1476(5) 0.8633(5) 0.048(2) Uani 1 1 d U . . 
C69 C 0.7258(6) 0.6308(5) 0.0957(5) 0.055(3) Uani 1 1 d U . . 
H69A H 0.7268 0.6591 0.0435 0.066 Uiso 1 1 calc R . . 
H69B H 0.7686 0.6559 0.1072 0.066 Uiso 1 1 calc R . . 
C70 C 0.6293(7) 0.6336(6) 0.1534(6) 0.067(3) Uani 1 1 d U . . 
H70A H 0.6125 0.6853 0.1507 0.100 Uiso 1 1 calc R . . 
H70B H 0.6275 0.6063 0.2054 0.100 Uiso 1 1 calc R . . 
H70C H 0.5858 0.6109 0.1413 0.100 Uiso 1 1 calc R . . 
C71 C 0.4536(8) 0.1630(7) 0.2676(7) 0.082(3) Uani 1 1 d U . . 
H71A H 0.4617 0.1245 0.2416 0.098 Uiso 1 1 calc R . . 
H71B H 0.4814 0.2095 0.2274 0.098 Uiso 1 1 calc R . . 
C72 C 0.3531(10) 0.1748(10) 0.3034(10) 0.135(5) Uani 1 1 d U . . 
H72A H 0.3258 0.1890 0.2636 0.203 Uiso 1 1 calc R . . 
H72B H 0.3436 0.2144 0.3276 0.203 Uiso 1 1 calc R . . 
H72C H 0.3239 0.1289 0.3424 0.203 Uiso 1 1 calc R . . 
O21 O 0.2517(4) 0.0821(4) 0.5158(4) 0.075(2) Uani 1 1 d U . . 
H21B H 0.2235 0.0426 0.5272 0.112 Uiso 1 1 calc R . . 
C73 C 0.1880(8) 0.1431(7) 0.5156(8) 0.095(4) Uani 1 1 d U . . 
H73A H 0.1791 0.1607 0.4656 0.114 Uiso 1 1 calc R . . 
H73B H 0.2129 0.1848 0.5228 0.114 Uiso 1 1 calc R . . 
C74 C 0.0901(10) 0.1149(9) 0.5852(9) 0.125(5) Uani 1 1 d U . . 
H1WB H 0.0464 0.1559 0.5854 0.187 Uiso 1 1 calc R . . 
H1WC H 0.0992 0.0982 0.6345 0.187 Uiso 1 1 calc R . . 
H1WD H 0.0657 0.0738 0.5775 0.187 Uiso 1 1 calc R . . 
O22 O 1.0512(5) 0.2972(4) 0.1111(4) 0.082(2) Uani 1 1 d U . . 
H22C H 1.0483 0.2868 0.0736 0.123 Uiso 1 1 calc R . . 
C75 C 1.1195(11) 0.2532(9) 0.1356(9) 0.128(5) Uani 1 1 d U . . 
H75A H 1.1632 0.2854 0.1369 0.192 Uiso 1 1 calc R . . 
H75B H 1.1521 0.2249 0.0996 0.192 Uiso 1 1 calc R . . 
H75C H 1.0902 0.2190 0.1871 0.192 Uiso 1 1 calc R . . 
C76 C 0.0124(14) 0.1795(5) 0.4000(12) 0.080(5) Uani 0.50 1 d PDU . . 
H76A H -0.0136 0.1901 0.4496 0.120 Uiso 0.50 1 calc PR . . 
H76B H -0.0202 0.2080 0.3664 0.120 Uiso 0.50 1 calc PR . . 
H76C H 0.0777 0.1935 0.3758 0.120 Uiso 0.50 1 calc PR . . 
O23 O 0.0018(14) 0.0937(6) 0.4135(12) 0.136(6) Uani 0.50 1 d PDU . . 
H23A H 0.0522 0.0729 0.4110 0.204 Uiso 0.50 1 calc PR . . 
O23' O 0.0337(5) 0.1787(7) 0.7808(7) 0.061(3) Uani 0.50 1 d PDU . . 
H23D H 0.0576 0.2049 0.7963 0.092 Uiso 0.50 1 calc PR . . 
C76' C -0.0695(6) 0.1999(11) 0.7966(12) 0.067(5) Uani 0.50 1 d PDU . . 
H76D H -0.1086 0.1566 0.8312 0.100 Uiso 0.50 1 calc PR . . 
H76E H -0.0801 0.2165 0.7479 0.100 Uiso 0.50 1 calc PR . . 
H76F H -0.0843 0.2400 0.8206 0.100 Uiso 0.50 1 calc PR . . 
O1W O 0.8345(14) 0.2119(12) 0.6040(12) 0.126(5) Uani 0.50 1 d PU . . 
 
loop_ 
 _atom_site_aniso_label 
 _atom_site_aniso_U_11 
 _atom_site_aniso_U_22 
 _atom_site_aniso_U_33 
 _atom_site_aniso_U_23 
 _atom_site_aniso_U_13 
 _atom_site_aniso_U_12 
Er1 0.03113(16) 0.03947(18) 0.02022(14) -0.01153(13) -0.00455(12) -0.01010(14) 
Er2 0.03126(16) 0.03781(18) 0.02242(14) -0.01058(13) -0.00703(13) -0.00758(14) 
Er3 0.03509(17) 0.0534(2) 0.02970(15) -0.02292(14) -0.00551(14) -0.01001(16) 
Er4 0.03838(17) 0.03458(19) 0.04166(18) -0.01195(15) -0.01805(15) -0.00151(15) 
Er5 0.03869(17) 0.03400(19) 0.04185(17) -0.01224(15) -0.02073(14) -0.00035(15) 
Er6 0.0521(2) 0.0438(2) 0.04346(18) -0.01624(16) -0.02584(16) 0.00049(17) 
Cl1 0.0903(16) 0.0546(14) 0.0679(14) -0.0151(12) -0.0359(12) 0.0024(13) 
Cl2 0.0565(13) 0.0911(17) 0.0879(15) -0.0450(13) -0.0260(12) 0.0094(13) 
O1 0.027(2) 0.045(3) 0.023(2) -0.0146(19) -0.0018(18) -0.009(2) 
O2 0.037(2) 0.030(2) 0.022(2) -0.0095(18) -0.0019(18) -0.021(2) 
O3 0.036(2) 0.045(3) 0.027(2) -0.016(2) -0.0096(19) -0.012(2) 
O4 0.042(3) 0.047(3) 0.031(2) -0.012(2) -0.009(2) 0.013(2) 
O5 0.033(2) 0.037(3) 0.023(2) -0.0088(19) -0.0089(18) -0.008(2) 
O6 0.055(3) 0.068(3) 0.041(2) -0.031(2) -0.014(2) -0.010(3) 
O7 0.047(3) 0.034(3) 0.041(3) -0.011(2) -0.016(2) -0.003(2) 
O8 0.031(2) 0.039(3) 0.054(3) -0.025(2) -0.011(2) -0.008(2) 
O9 0.038(2) 0.035(3) 0.039(2) -0.015(2) -0.013(2) -0.009(2) 
O10 0.065(3) 0.048(3) 0.045(3) -0.019(2) -0.031(2) 0.018(3) 
O11 0.028(2) 0.029(2) 0.040(2) -0.010(2) -0.0160(19) -0.001(2) 
O12 0.054(3) 0.060(3) 0.046(3) -0.028(2) -0.022(2) 0.001(3) 
O13 0.033(2) 0.028(2) 0.022(2) -0.0096(18) -0.0100(18) -0.003(2) 
O14 0.031(2) 0.030(2) 0.024(2) -0.0105(18) -0.0098(18) -0.005(2) 
O15 0.031(2) 0.035(3) 0.037(2) -0.012(2) -0.0176(19) 0.000(2) 
O16 0.030(2) 0.035(3) 0.035(2) -0.009(2) -0.0212(18) 0.001(2) 
O17 0.151(5) 0.080(4) 0.083(4) -0.040(3) -0.042(4) 0.022(4) 
O18 0.109(5) 0.186(6) 0.113(4) -0.067(4) -0.069(4) 0.045(5) 
O19 0.044(3) 0.041(3) 0.030(2) -0.020(2) -0.013(2) 0.009(2) 
O20 0.076(3) 0.052(3) 0.047(3) -0.021(2) -0.040(2) 0.013(3) 
N1 0.034(3) 0.042(3) 0.026(3) -0.010(2) -0.010(2) -0.002(3) 
N2 0.069(4) 0.060(4) 0.037(3) 0.000(3) -0.029(3) -0.029(3) 
N3 0.032(3) 0.044(3) 0.021(3) -0.005(2) -0.011(2) 0.001(3) 
N4 0.037(3) 0.050(3) 0.027(3) -0.014(2) -0.010(2) -0.006(3) 
N5 0.045(3) 0.038(3) 0.050(3) -0.009(3) -0.015(3) -0.004(3) 
N6 0.064(4) 0.055(4) 0.048(3) -0.023(3) -0.005(3) -0.017(3) 
N7 0.039(3) 0.043(3) 0.044(3) -0.011(3) -0.019(3) 0.000(3) 
N8 0.049(3) 0.040(3) 0.037(3) -0.015(3) -0.021(3) 0.006(3) 
C1 0.038(3) 0.051(4) 0.026(3) -0.021(3) -0.010(3) -0.001(3) 
C2 0.039(4) 0.058(4) 0.035(3) -0.025(3) -0.012(3) 0.002(3) 
C3 0.054(4) 0.066(4) 0.048(4) -0.034(3) -0.016(3) 0.005(4) 
C4 0.051(4) 0.071(5) 0.047(4) -0.020(4) -0.007(3) -0.005(4) 
C5 0.040(4) 0.063(4) 0.045(4) -0.021(3) -0.004(3) -0.011(4) 
C6 0.036(3) 0.049(4) 0.030(3) -0.007(3) -0.012(3) -0.005(3) 
C7 0.041(4) 0.034(4) 0.038(4) -0.004(3) -0.009(3) -0.012(3) 
C8 0.059(4) 0.040(4) 0.038(3) -0.018(3) -0.011(3) -0.018(3) 
C9 0.128(6) 0.094(6) 0.092(6) -0.023(5) -0.041(5) -0.044(5) 
C10 0.125(6) 0.124(7) 0.110(6) -0.020(5) -0.058(5) -0.049(5) 
C11 0.047(4) 0.051(4) 0.045(4) -0.014(3) -0.018(3) -0.018(3) 
C12 0.037(3) 0.039(4) 0.045(4) -0.018(3) -0.017(3) -0.006(3) 
C13 0.044(4) 0.065(4) 0.057(4) -0.028(3) -0.018(3) -0.009(4) 
C14 0.058(4) 0.067(4) 0.059(4) -0.027(3) -0.025(3) -0.026(4) 
C15 0.068(4) 0.071(4) 0.047(4) -0.032(3) -0.023(3) -0.014(4) 
C16 0.051(4) 0.063(4) 0.040(3) -0.020(3) -0.018(3) -0.010(4) 
C17 0.024(3) 0.046(4) 0.028(3) -0.019(3) -0.008(3) -0.001(3) 
C18 0.036(3) 0.044(4) 0.040(3) -0.021(3) -0.015(3) 0.000(3) 
C19 0.045(4) 0.052(4) 0.049(4) -0.014(3) -0.013(3) 0.005(4) 
C20 0.041(4) 0.075(5) 0.061(4) -0.026(4) -0.019(3) 0.008(4) 
C21 0.058(5) 0.077(5) 0.063(5) -0.019(4) -0.025(4) 0.015(4) 
C22 0.064(5) 0.071(5) 0.054(4) -0.017(4) -0.028(4) 0.012(4) 
C23 0.046(4) 0.057(4) 0.041(4) -0.017(3) -0.020(3) 0.008(4) 
C24 0.053(4) 0.052(4) 0.029(3) -0.006(3) -0.022(3) -0.001(4) 
C25 0.047(4) 0.045(4) 0.022(3) -0.007(3) -0.011(3) 0.006(3) 
C26 0.036(3) 0.036(4) 0.024(3) -0.009(3) -0.011(3) -0.005(3) 
C27 0.045(4) 0.044(4) 0.031(3) -0.009(3) -0.016(3) -0.008(3) 
C28 0.033(3) 0.061(4) 0.037(3) -0.016(3) -0.012(3) -0.006(3) 
C29 0.040(4) 0.070(5) 0.030(3) -0.023(3) -0.011(3) -0.003(4) 
C30 0.047(4) 0.078(5) 0.040(4) -0.028(3) -0.013(3) 0.000(4) 
C31 0.071(5) 0.088(5) 0.050(4) -0.042(4) -0.024(3) 0.005(4) 
C32 0.070(5) 0.084(5) 0.062(4) -0.046(4) -0.027(4) 0.004(4) 
C33 0.055(4) 0.073(5) 0.052(4) -0.032(3) -0.018(3) 0.002(4) 
C34 0.037(3) 0.066(4) 0.042(3) -0.035(3) -0.015(3) -0.001(3) 
C35 0.059(4) 0.039(4) 0.051(4) -0.009(3) -0.015(4) 0.003(4) 
C36 0.068(5) 0.062(5) 0.050(4) -0.013(4) -0.021(4) 0.002(4) 
C37 0.093(6) 0.087(6) 0.070(5) -0.023(4) -0.036(4) 0.014(5) 
C38 0.087(6) 0.085(6) 0.068(5) -0.014(5) -0.019(4) 0.009(5) 
C39 0.071(5) 0.070(5) 0.067(5) -0.010(4) -0.013(4) 0.005(5) 
C40 0.058(4) 0.045(4) 0.044(4) -0.007(3) -0.014(3) 0.006(4) 
C41 0.055(4) 0.039(4) 0.076(5) -0.019(4) -0.015(4) -0.007(4) 
C42 0.051(4) 0.064(5) 0.075(5) -0.037(4) -0.013(4) -0.009(4) 
C43 0.088(6) 0.110(6) 0.118(6) -0.065(5) -0.023(5) -0.001(5) 
C44 0.096(6) 0.096(6) 0.105(6) -0.054(5) -0.006(5) -0.011(5) 
C45 0.057(4) 0.047(4) 0.055(4) -0.017(3) -0.012(3) -0.019(4) 
C46 0.051(4) 0.049(4) 0.047(4) -0.018(3) -0.028(3) -0.007(3) 
C47 0.065(4) 0.056(4) 0.064(4) -0.016(4) -0.026(4) -0.021(4) 
C48 0.072(4) 0.049(4) 0.071(4) -0.031(3) -0.026(4) -0.017(4) 
C49 0.067(4) 0.062(4) 0.062(4) -0.033(3) -0.027(3) -0.006(4) 
C50 0.052(4) 0.056(4) 0.057(4) -0.025(3) -0.020(3) -0.010(4) 
C51 0.026(3) 0.038(4) 0.030(3) -0.012(3) -0.013(3) 0.002(3) 
C52 0.065(4) 0.046(4) 0.050(4) -0.013(3) -0.035(3) -0.005(4) 
C53 0.057(4) 0.061(5) 0.052(4) -0.014(4) -0.028(3) 0.005(4) 
C54 0.075(5) 0.059(5) 0.066(5) -0.008(4) -0.035(4) -0.004(4) 
C55 0.075(5) 0.053(5) 0.074(5) -0.013(4) -0.038(4) 0.004(4) 
C56 0.059(4) 0.047(4) 0.065(5) -0.014(4) -0.021(4) 0.000(4) 
C57 0.053(4) 0.034(4) 0.050(4) -0.017(3) -0.026(3) -0.002(3) 
C58 0.033(3) 0.044(4) 0.060(4) -0.019(3) -0.019(3) -0.001(3) 
C59 0.041(4) 0.042(4) 0.046(4) -0.015(3) -0.015(3) 0.009(3) 
C60 0.033(3) 0.047(4) 0.047(4) -0.017(3) -0.022(3) 0.002(3) 
C61 0.043(4) 0.042(4) 0.044(4) -0.015(3) -0.016(3) 0.005(3) 
C62 0.049(4) 0.035(4) 0.045(4) -0.002(3) -0.015(3) 0.000(3) 
C63 0.069(5) 0.048(4) 0.046(4) -0.024(3) -0.019(3) -0.002(4) 
C64 0.073(5) 0.073(5) 0.055(4) -0.027(4) -0.022(4) 0.012(4) 
C65 0.081(5) 0.075(5) 0.055(4) -0.027(4) -0.025(4) 0.007(4) 
C66 0.076(5) 0.066(5) 0.061(4) -0.026(4) -0.029(4) 0.004(4) 
C67 0.060(4) 0.063(5) 0.040(4) -0.021(3) -0.021(3) -0.002(4) 
C68 0.061(4) 0.047(4) 0.048(4) -0.019(3) -0.028(3) 0.002(4) 
C69 0.056(4) 0.050(4) 0.051(4) -0.013(4) -0.015(4) 0.012(4) 
C70 0.070(5) 0.069(5) 0.058(4) -0.024(4) -0.020(4) 0.018(4) 
C71 0.090(5) 0.082(6) 0.081(5) -0.029(4) -0.040(4) 0.018(5) 
C72 0.120(7) 0.141(7) 0.140(7) -0.032(6) -0.049(5) 0.002(6) 
O21 0.046(3) 0.077(4) 0.111(4) -0.045(3) -0.029(3) 0.014(3) 
C73 0.092(6) 0.100(6) 0.104(6) -0.038(5) -0.041(5) 0.002(5) 
C74 0.112(7) 0.117(7) 0.139(7) -0.040(5) -0.036(5) -0.003(6) 
O22 0.099(4) 0.067(4) 0.082(4) -0.024(3) -0.034(3) 0.004(4) 
C75 0.131(7) 0.132(7) 0.138(7) -0.060(5) -0.051(5) 0.003(6) 
C76 0.072(7) 0.099(8) 0.078(7) -0.014(6) -0.047(5) 0.005(6) 
O23 0.130(8) 0.140(8) 0.140(8) -0.040(6) -0.053(6) 0.006(6) 
O23' 0.057(5) 0.055(5) 0.079(6) -0.027(4) -0.026(4) -0.003(5) 
C76' 0.064(7) 0.056(7) 0.068(7) -0.007(6) -0.019(5) 0.001(6) 
O1W 0.124(7) 0.134(8) 0.132(7) -0.042(6) -0.058(6) 0.004(6) 
 
_geom_special_details 
; 
 All esds (except the esd in the dihedral angle between two l.s. planes) 
 are estimated using the full covariance matrix.  The cell esds are taken 
 into account individually in the estimation of esds in distances, angles 
 and torsion angles; correlations between esds in cell parameters are only 
 used when they are defined by crystal symmetry.  An approximate (isotropic) 
 treatment of cell esds is used for estimating esds involving l.s. planes. 
; 
 
loop_ 
 _geom_bond_atom_site_label_1 
 _geom_bond_atom_site_label_2 
 _geom_bond_distance 
 _geom_bond_site_symmetry_2 
 _geom_bond_publ_flag 
Er1 O2 2.256(5) 2_765 ? 
Er1 O14 2.324(5) . ? 
Er1 O13 2.382(4) 2_765 ? 
Er1 O19 2.383(5) . ? 
Er1 O13 2.403(4) . ? 
Er1 O1 2.416(5) 2_765 ? 
Er1 O5 2.484(5) . ? 
Er1 N1 2.486(6) 2_765 ? 
Er1 Er2 3.7943(9) 2_765 ? 
Er1 Er1 3.9212(13) 2_765 ? 
Er2 O4 2.260(5) . ? 
Er2 O2 2.286(5) . ? 
Er2 O13 2.350(5) . ? 
Er2 O3 2.372(5) . ? 
Er2 O5 2.387(4) . ? 
Er2 O14 2.433(5) . ? 
Er2 N2 2.459(7) . ? 
Er2 N3 2.494(6) . ? 
Er2 Er1 3.7943(9) 2_765 ? 
Er3 O6 2.192(6) . ? 
Er3 O1 2.296(5) 2_765 ? 
Er3 O3 2.299(5) . ? 
Er3 O17 2.329(8) . ? 
Er3 O14 2.340(5) . ? 
Er3 O5 2.376(5) . ? 
Er3 N4 2.458(6) . ? 
Er4 O8 2.235(5) . ? 
Er4 O16 2.328(5) 2_656 ? 
Er4 O20 2.369(6) . ? 
Er4 O15 2.398(5) 2_656 ? 
Er4 O15 2.408(5) . ? 
Er4 O7 2.421(6) . ? 
Er4 O11 2.486(5) 2_656 ? 
Er4 N5 2.536(6) . ? 
Er4 Er5 3.5133(15) 2_656 ? 
Er4 Er6 3.5801(10) 2_656 ? 
Er5 O10 2.312(6) . ? 
Er5 O8 2.316(5) . ? 
Er5 O15 2.342(5) . ? 
Er5 O9 2.364(5) . ? 
Er5 O11 2.383(4) . ? 
Er5 O16 2.429(5) . ? 
Er5 N6 2.476(7) . ? 
Er5 N7 2.507(7) . ? 
Er5 Er4 3.5133(15) 2_656 ? 
Er6 O12 2.164(6) . ? 
Er6 O9 2.306(5) . ? 
Er6 O18 2.314(9) . ? 
Er6 O7 2.329(5) 2_656 ? 
Er6 O16 2.336(5) . ? 
Er6 O11 2.397(5) . ? 
Er6 N8 2.475(6) . ? 
Er6 Er4 3.5801(10) 2_656 ? 
O1 C1 1.329(8) . ? 
O1 Er3 2.296(5) 2_765 ? 
O1 Er1 2.416(5) 2_765 ? 
O2 C9 1.337(10) . ? 
O2 Er1 2.256(5) 2_765 ? 
O3 C17 1.339(9) . ? 
O4 C18 1.304(9) . ? 
O5 C26 1.427(8) . ? 
O6 C34 1.313(9) . ? 
O7 C35 1.326(10) . ? 
O7 Er6 2.329(5) 2_656 ? 
O8 C43 1.319(10) . ? 
O9 C51 1.360(9) . ? 
O10 C52 1.281(10) . ? 
O11 C60 1.395(9) . ? 
O11 Er4 2.486(5) 2_656 ? 
O12 C68 1.324(10) . ? 
O13 Er1 2.382(4) 2_765 ? 
O13 H13B 0.9800 . ? 
O14 H14B 0.9800 . ? 
O15 Er4 2.398(5) 2_656 ? 
O15 H15B 0.9800 . ? 
O16 Er4 2.328(5) 2_656 ? 
O16 H16B 0.9800 . ? 
O19 C69 1.451(10) . ? 
O19 H19C 0.8200 . ? 
O20 C71 1.425(13) . ? 
O20 H20C 0.8200 . ? 
N1 C7 1.278(9) . ? 
N1 C8 1.462(10) . ? 
N1 Er1 2.486(6) 2_765 ? 
N2 C11 1.257(12) . ? 
N2 C10 1.407(13) . ? 
N3 C24 1.269(10) . ? 
N3 C25 1.461(8) . ? 
N4 C28 1.292(10) . ? 
N4 C27 1.444(10) . ? 
N5 C41 1.248(11) . ? 
N5 C42 1.473(13) . ? 
N6 C45 1.258(12) . ? 
N6 C44 1.436(12) . ? 
N7 C58 1.276(10) . ? 
N7 C59 1.454(10) . ? 
N8 C62 1.262(11) . ? 
N8 C61 1.469(11) . ? 
C1 C2 1.394(11) . ? 
C1 C6 1.432(11) . ? 
C2 C3 1.397(10) . ? 
C2 H2A 0.9300 . ? 
C3 C4 1.361(13) . ? 
C3 H3A 0.9300 . ? 
C4 C5 1.347(13) . ? 
C4 H4A 0.9300 . ? 
C5 C6 1.401(10) . ? 
C5 H5A 0.9300 . ? 
C6 C7 1.441(12) . ? 
C7 H7A 0.9300 . ? 
C8 C9 1.449(13) . ? 
C8 H8A 0.9700 . ? 
C8 H8B 0.9700 . ? 
C9 C10 1.500(9) . ? 
C9 H9A 0.9800 . ? 
C10 H10B 0.9700 . ? 
C10 H10A 0.9700 . ? 
C11 C12 1.440(12) . ? 
C11 H11A 0.9300 . ? 
C12 C17 1.390(9) . ? 
C12 C13 1.406(12) . ? 
C13 C14 1.364(13) . ? 
C13 H13A 0.9300 . ? 
C14 C15 1.368(11) . ? 
C14 H14A 0.9300 . ? 
C15 C16 1.390(13) . ? 
C15 H15A 0.9300 . ? 
C16 C17 1.407(11) . ? 
C16 H16A 0.9300 . ? 
C18 C19 1.428(10) . ? 
C18 C23 1.430(11) . ? 
C19 C20 1.345(13) . ? 
C19 H19A 0.9300 . ? 
C20 C21 1.374(13) . ? 
C20 H20A 0.9300 . ? 
C21 C22 1.390(12) . ? 
C21 H21A 0.9300 . ? 
C22 C23 1.380(13) . ? 
C22 H22A 0.9300 . ? 
C23 C24 1.448(11) . ? 
C24 H24A 0.9300 . ? 
C25 C26 1.523(11) . ? 
C25 H25A 0.9700 . ? 
C25 H25B 0.9700 . ? 
C26 C27 1.517(10) . ? 
C26 H26A 0.9800 . ? 
C27 H27B 0.9700 . ? 
C27 H27A 0.9700 . ? 
C28 C29 1.430(13) . ? 
C28 H28A 0.9300 . ? 
C29 C34 1.373(11) . ? 
C29 C30 1.426(11) . ? 
C30 C31 1.346(14) . ? 
C30 H30A 0.9300 . ? 
C31 C32 1.339(13) . ? 
C31 H31A 0.9300 . ? 
C32 C33 1.412(13) . ? 
C32 H32A 0.9300 . ? 
C33 C34 1.398(13) . ? 
C33 H33A 0.9300 . ? 
C35 C40 1.407(13) . ? 
C35 C36 1.422(15) . ? 
C36 C37 1.377(13) . ? 
C36 H36A 0.9300 . ? 
C37 C38 1.346(17) . ? 
C37 H37A 0.9300 . ? 
C38 C39 1.360(18) . ? 
C38 H38A 0.9300 . ? 
C39 C40 1.445(13) . ? 
C39 H39A 0.9300 . ? 
C40 C41 1.463(15) . ? 
C41 H41A 0.9300 . ? 
C42 C43 1.477(13) . ? 
C42 H42A 0.9700 . ? 
C42 H42B 0.9700 . ? 
C43 C44 1.494(9) . ? 
C43 H43A 0.9800 . ? 
C44 H44B 0.9700 . ? 
C44 H44A 0.9700 . ? 
C45 C46 1.462(12) . ? 
C45 H45A 0.9300 . ? 
C46 C51 1.382(10) . ? 
C46 C47 1.395(13) . ? 
C47 C48 1.360(13) . ? 
C47 H47A 0.9300 . ? 
C48 C49 1.333(12) . ? 
C48 H48A 0.9300 . ? 
C49 C50 1.387(13) . ? 
C49 H49A 0.9300 . ? 
C50 C51 1.378(12) . ? 
C50 H50A 0.9300 . ? 
C52 C53 1.411(12) . ? 
C52 C57 1.416(12) . ? 
C53 C54 1.413(14) . ? 
C53 H53A 0.9300 . ? 
C54 C55 1.343(14) . ? 
C54 H54A 0.9300 . ? 
C55 C56 1.349(13) . ? 
C55 H55A 0.9300 . ? 
C56 C57 1.406(12) . ? 
C56 H56A 0.9300 . ? 
C57 C58 1.440(11) . ? 
C58 H58A 0.9300 . ? 
C59 C60 1.521(11) . ? 
C59 H59A 0.9700 . ? 
C59 H59B 0.9700 . ? 
C60 C61 1.513(11) . ? 
C60 H60A 0.9800 . ? 
C61 H61A 0.9700 . ? 
C61 H61B 0.9700 . ? 
C62 C63 1.466(14) . ? 
C62 H62A 0.9300 . ? 
C63 C64 1.371(13) . ? 
C63 C68 1.397(12) . ? 
C64 C65 1.394(16) . ? 
C64 H64A 0.9300 . ? 
C65 C66 1.361(14) . ? 
C65 H65A 0.9300 . ? 
C66 C67 1.344(13) . ? 
C66 H66A 0.9300 . ? 
C67 C68 1.415(13) . ? 
C67 H67A 0.9300 . ? 
C69 C70 1.490(12) . ? 
C69 H69A 0.9700 . ? 
C69 H69B 0.9700 . ? 
C70 H70A 0.9600 . ? 
C70 H70B 0.9600 . ? 
C70 H70C 0.9600 . ? 
C71 C72 1.461(17) . ? 
C71 H71A 0.9700 . ? 
C71 H71B 0.9700 . ? 
C72 H72A 0.9600 . ? 
C72 H72B 0.9600 . ? 
C72 H72C 0.9600 . ? 
O21 C73 1.419(14) . ? 
O21 H21B 0.8200 . ? 
C73 C74 1.597(17) . ? 
C73 H73A 0.9700 . ? 
C73 H73B 0.9700 . ? 
C74 H1WB 0.9600 . ? 
C74 H1WC 0.9600 . ? 
C74 H1WD 0.9600 . ? 
O22 C75 1.392(17) . ? 
O22 H22C 0.8200 . ? 
C75 H75A 0.9600 . ? 
C75 H75B 0.9600 . ? 
C75 H75C 0.9600 . ? 
C76 O23 1.553(9) . ? 
C76 H76A 0.9600 . ? 
C76 H76B 0.9600 . ? 
C76 H76C 0.9600 . ? 
O23 H23A 0.8200 . ? 
O23' C76' 1.530(8) . ? 
O23' H23D 0.8200 . ? 
C76' H76D 0.9600 . ? 
C76' H76E 0.9600 . ? 
C76' H76F 0.9600 . ? 
 
loop_ 
 _geom_angle_atom_site_label_1 
 _geom_angle_atom_site_label_2 
 _geom_angle_atom_site_label_3 
 _geom_angle 
 _geom_angle_site_symmetry_1 
 _geom_angle_site_symmetry_3 
 _geom_angle_publ_flag 
O2 Er1 O14 152.08(15) 2_765 . ? 
O2 Er1 O13 68.97(16) 2_765 2_765 ? 
O14 Er1 O13 83.79(16) . 2_765 ? 
O2 Er1 O19 79.87(18) 2_765 . ? 
O14 Er1 O19 101.47(17) . . ? 
O13 Er1 O19 79.13(16) 2_765 . ? 
O2 Er1 O13 84.69(17) 2_765 . ? 
O14 Er1 O13 80.19(16) . . ? 
O13 Er1 O13 69.91(19) 2_765 . ? 
O19 Er1 O13 148.68(16) . . ? 
O2 Er1 O1 132.19(15) 2_765 2_765 ? 
O14 Er1 O1 72.84(15) . 2_765 ? 
O13 Er1 O1 137.66(16) 2_765 2_765 ? 
O19 Er1 O1 71.86(17) . 2_765 ? 
O13 Er1 O1 136.22(17) . 2_765 ? 
O2 Er1 O5 132.91(17) 2_765 . ? 
O14 Er1 O5 61.91(16) . . ? 
O13 Er1 O5 129.99(15) 2_765 . ? 
O19 Er1 O5 139.26(17) . . ? 
O13 Er1 O5 69.28(16) . . ? 
O1 Er1 O5 67.73(16) 2_765 . ? 
O2 Er1 N1 66.83(19) 2_765 2_765 ? 
O14 Er1 N1 141.04(19) . 2_765 ? 
O13 Er1 N1 134.7(2) 2_765 2_765 ? 
O19 Er1 N1 83.78(18) . 2_765 ? 
O13 Er1 N1 114.77(18) . 2_765 ? 
O1 Er1 N1 72.35(18) 2_765 2_765 ? 
O5 Er1 N1 88.85(18) . 2_765 ? 
O2 Er1 Er2 33.61(11) 2_765 2_765 ? 
O14 Er1 Er2 120.05(11) . 2_765 ? 
O13 Er1 Er2 36.40(12) 2_765 2_765 ? 
O19 Er1 Er2 70.81(13) . 2_765 ? 
O13 Er1 Er2 81.25(12) . 2_765 ? 
O1 Er1 Er2 142.28(12) 2_765 2_765 ? 
O5 Er1 Er2 149.89(11) . 2_765 ? 
N1 Er1 Er2 98.29(16) 2_765 2_765 ? 
O2 Er1 Er1 74.05(11) 2_765 2_765 ? 
O14 Er1 Er1 80.20(11) . 2_765 ? 
O13 Er1 Er1 35.13(11) 2_765 2_765 ? 
O19 Er1 Er1 114.13(12) . 2_765 ? 
O13 Er1 Er1 34.78(11) . 2_765 ? 
O1 Er1 Er1 153.04(11) 2_765 2_765 ? 
O5 Er1 Er1 99.99(10) . 2_765 ? 
N1 Er1 Er1 133.13(15) 2_765 2_765 ? 
Er2 Er1 Er1 54.403(18) 2_765 2_765 ? 
O4 Er2 O2 81.88(18) . . ? 
O4 Er2 O13 93.42(19) . . ? 
O2 Er2 O13 69.04(16) . . ? 
O4 Er2 O3 119.9(2) . . ? 
O2 Er2 O3 129.71(17) . . ? 
O13 Er2 O3 141.72(15) . . ? 
O4 Er2 O5 134.68(17) . . ? 
O2 Er2 O5 127.22(17) . . ? 
O13 Er2 O5 71.83(16) . . ? 
O3 Er2 O5 71.21(16) . . ? 
O4 Er2 O14 158.85(17) . . ? 
O2 Er2 O14 76.97(16) . . ? 
O13 Er2 O14 79.07(16) . . ? 
O3 Er2 O14 75.10(17) . . ? 
O5 Er2 O14 61.85(15) . . ? 
O4 Er2 N2 81.8(2) . . ? 
O2 Er2 N2 69.1(2) . . ? 
O13 Er2 N2 138.1(2) . . ? 
O3 Er2 N2 70.3(2) . . ? 
O5 Er2 N2 137.2(2) . . ? 
O14 Er2 N2 90.6(2) . . ? 
O4 Er2 N3 72.31(18) . . ? 
O2 Er2 N3 150.40(18) . . ? 
O13 Er2 N3 97.78(19) . . ? 
O3 Er2 N3 77.23(19) . . ? 
O5 Er2 N3 67.89(17) . . ? 
O14 Er2 N3 128.01(16) . . ? 
N2 Er2 N3 119.7(2) . . ? 
O4 Er2 Er1 80.48(15) . 2_765 ? 
O2 Er2 Er1 33.11(12) . 2_765 ? 
O13 Er2 Er1 36.97(10) . 2_765 ? 
O3 Er2 Er1 155.26(12) . 2_765 ? 
O5 Er2 Er1 105.48(13) . 2_765 ? 
O14 Er2 Er1 81.78(12) . 2_765 ? 
N2 Er2 Er1 101.65(17) . 2_765 ? 
N3 Er2 Er1 125.21(16) . 2_765 ? 
O6 Er3 O1 116.71(18) . 2_765 ? 
O6 Er3 O3 98.8(2) . . ? 
O1 Er3 O3 142.03(17) 2_765 . ? 
O6 Er3 O17 77.0(3) . . ? 
O1 Er3 O17 95.7(3) 2_765 . ? 
O3 Er3 O17 105.3(3) . . ? 
O6 Er3 O14 154.99(18) . . ? 
O1 Er3 O14 74.77(16) 2_765 . ? 
O3 Er3 O14 78.29(17) . . ? 
O17 Er3 O14 79.8(2) . . ? 
O6 Er3 O5 140.0(2) . . ? 
O1 Er3 O5 71.52(17) 2_765 . ? 
O3 Er3 O5 72.67(17) . . ? 
O17 Er3 O5 142.9(2) . . ? 
O14 Er3 O5 63.36(16) . . ? 
O6 Er3 N4 73.1(2) . . ? 
O1 Er3 N4 81.7(2) 2_765 . ? 
O3 Er3 N4 97.34(19) . . ? 
O17 Er3 N4 144.8(2) . . ? 
O14 Er3 N4 131.85(19) . . ? 
O5 Er3 N4 69.54(19) . . ? 
O8 Er4 O16 151.26(17) . 2_656 ? 
O8 Er4 O20 82.6(2) . . ? 
O16 Er4 O20 97.39(19) 2_656 . ? 
O8 Er4 O15 84.37(18) . 2_656 ? 
O16 Er4 O15 80.07(17) 2_656 2_656 ? 
O20 Er4 O15 146.52(18) . 2_656 ? 
O8 Er4 O15 69.11(17) . . ? 
O16 Er4 O15 82.71(17) 2_656 . ? 
O20 Er4 O15 78.03(18) . . ? 
O15 Er4 O15 68.52(19) 2_656 . ? 
O8 Er4 O7 131.59(17) . . ? 
O16 Er4 O7 73.95(17) 2_656 . ? 
O20 Er4 O7 71.06(19) . . ? 
O15 Er4 O7 137.47(17) 2_656 . ? 
O15 Er4 O7 137.94(18) . . ? 
O8 Er4 O11 133.36(18) . 2_656 ? 
O16 Er4 O11 62.19(16) 2_656 2_656 ? 
O20 Er4 O11 138.09(19) . 2_656 ? 
O15 Er4 O11 69.99(17) 2_656 2_656 ? 
O15 Er4 O11 129.13(15) . 2_656 ? 
O7 Er4 O11 68.23(17) . 2_656 ? 
O8 Er4 N5 67.9(2) . . ? 
O16 Er4 N5 140.8(2) 2_656 . ? 
O20 Er4 N5 85.5(2) . . ? 
O15 Er4 N5 117.5(2) 2_656 . ? 
O15 Er4 N5 135.5(2) . . ? 
O7 Er4 N5 70.2(2) . . ? 
O11 Er4 N5 89.87(19) 2_656 . ? 
O8 Er4 Er5 125.91(13) . 2_656 ? 
O16 Er4 Er5 43.51(12) 2_656 2_656 ? 
O20 Er4 Er5 139.86(14) . 2_656 ? 
O15 Er4 Er5 41.55(13) 2_656 2_656 ? 
O15 Er4 Er5 86.48(11) . 2_656 ? 
O7 Er4 Er5 99.07(12) . 2_656 ? 
O11 Er4 Er5 42.66(10) 2_656 2_656 ? 
N5 Er4 Er5 128.88(16) . 2_656 ? 
O8 Er4 Er6 168.73(12) . 2_656 ? 
O16 Er4 Er6 39.94(12) 2_656 2_656 ? 
O20 Er4 Er6 98.34(15) . 2_656 ? 
O15 Er4 Er6 100.37(13) 2_656 2_656 ? 
O15 Er4 Er6 122.12(12) . 2_656 ? 
O7 Er4 Er6 40.13(12) . 2_656 ? 
O11 Er4 Er6 41.90(12) 2_656 2_656 ? 
N5 Er4 Er6 100.92(18) . 2_656 ? 
Er5 Er4 Er6 59.54(2) 2_656 2_656 ? 
O10 Er5 O8 81.90(19) . . ? 
O10 Er5 O15 90.8(2) . . ? 
O8 Er5 O15 68.96(16) . . ? 
O10 Er5 O9 121.77(19) . . ? 
O8 Er5 O9 129.13(18) . . ? 
O15 Er5 O9 142.27(16) . . ? 
O10 Er5 O11 132.08(18) . . ? 
O8 Er5 O11 128.44(17) . . ? 
O15 Er5 O11 72.73(17) . . ? 
O9 Er5 O11 71.16(17) . . ? 
O10 Er5 O16 159.19(18) . . ? 
O8 Er5 O16 77.49(17) . . ? 
O15 Er5 O16 79.16(17) . . ? 
O9 Er5 O16 74.76(17) . . ? 
O11 Er5 O16 62.32(16) . . ? 
O10 Er5 N6 83.4(2) . . ? 
O8 Er5 N6 68.2(2) . . ? 
O15 Er5 N6 137.2(2) . . ? 
O9 Er5 N6 70.8(2) . . ? 
O11 Er5 N6 138.3(2) . . ? 
O16 Er5 N6 91.5(2) . . ? 
O10 Er5 N7 71.5(2) . . ? 
O8 Er5 N7 151.3(2) . . ? 
O15 Er5 N7 100.3(2) . . ? 
O9 Er5 N7 75.9(2) . . ? 
O11 Er5 N7 67.95(18) . . ? 
O16 Er5 N7 128.00(18) . . ? 
N6 Er5 N7 117.6(2) . . ? 
O10 Er5 Er4 133.44(16) . 2_656 ? 
O8 Er5 Er4 83.54(12) . 2_656 ? 
O15 Er5 Er4 42.78(12) . 2_656 ? 
O9 Er5 Er4 101.52(12) . 2_656 ? 
O11 Er5 Er4 44.98(12) . 2_656 ? 
O16 Er5 Er4 41.30(11) . 2_656 ? 
N6 Er5 Er4 130.31(18) . 2_656 ? 
N7 Er5 Er4 106.94(14) . 2_656 ? 
O12 Er6 O9 102.2(2) . . ? 
O12 Er6 O18 78.4(3) . . ? 
O9 Er6 O18 112.5(3) . . ? 
O12 Er6 O7 113.9(2) . 2_656 ? 
O9 Er6 O7 141.2(2) . 2_656 ? 
O18 Er6 O7 89.1(3) . 2_656 ? 
O12 Er6 O16 154.93(19) . . ? 
O9 Er6 O16 77.65(17) . . ? 
O18 Er6 O16 78.6(3) . . ? 
O7 Er6 O16 75.55(17) 2_656 . ? 
O12 Er6 O11 140.86(19) . . ? 
O9 Er6 O11 71.88(17) . . ? 
O18 Er6 O11 140.3(3) . . ? 
O7 Er6 O11 71.21(18) 2_656 . ? 
O16 Er6 O11 63.47(16) . . ? 
O12 Er6 N8 73.6(2) . . ? 
O9 Er6 N8 99.45(19) . . ? 
O18 Er6 N8 141.2(3) . . ? 
O7 Er6 N8 78.5(2) 2_656 . ? 
O16 Er6 N8 131.4(2) . . ? 
O11 Er6 N8 69.5(2) . . ? 
O12 Er6 Er4 155.97(14) . 2_656 ? 
O9 Er6 Er4 100.87(14) . 2_656 ? 
O18 Er6 Er4 98.9(3) . 2_656 ? 
O7 Er6 Er4 42.05(14) 2_656 2_656 ? 
O16 Er6 Er4 39.79(11) . 2_656 ? 
O11 Er6 Er4 43.82(12) . 2_656 ? 
N8 Er6 Er4 95.93(17) . 2_656 ? 
C1 O1 Er3 123.2(5) . 2_765 ? 
C1 O1 Er1 135.4(5) . 2_765 ? 
Er3 O1 Er1 98.92(15) 2_765 2_765 ? 
C9 O2 Er1 120.6(5) . 2_765 ? 
C9 O2 Er2 124.7(5) . . ? 
Er1 O2 Er2 113.28(18) 2_765 . ? 
C17 O3 Er3 130.7(4) . . ? 
C17 O3 Er2 130.2(4) . . ? 
Er3 O3 Er2 97.50(19) . . ? 
C18 O4 Er2 141.0(5) . . ? 
C26 O5 Er3 117.4(4) . . ? 
C26 O5 Er2 120.7(4) . . ? 
Er3 O5 Er2 95.02(17) . . ? 
C26 O5 Er1 128.3(4) . . ? 
Er3 O5 Er1 94.91(17) . . ? 
Er2 O5 Er1 92.82(16) . . ? 
C34 O6 Er3 143.2(5) . . ? 
C35 O7 Er6 119.1(6) . 2_656 ? 
C35 O7 Er4 139.7(6) . . ? 
Er6 O7 Er4 97.82(18) 2_656 . ? 
C43 O8 Er4 120.5(6) . . ? 
C43 O8 Er5 121.4(5) . . ? 
Er4 O8 Er5 113.4(2) . . ? 
C51 O9 Er6 129.8(5) . . ? 
C51 O9 Er5 131.1(4) . . ? 
Er6 O9 Er5 97.91(19) . . ? 
C52 O10 Er5 141.6(5) . . ? 
C60 O11 Er5 120.9(4) . . ? 
C60 O11 Er6 116.9(5) . . ? 
Er5 O11 Er6 94.94(16) . . ? 
C60 O11 Er4 129.4(4) . 2_656 ? 
Er5 O11 Er4 92.35(16) . 2_656 ? 
Er6 O11 Er4 94.29(17) . 2_656 ? 
C68 O12 Er6 142.7(6) . . ? 
Er2 O13 Er1 106.63(17) . 2_765 ? 
Er2 O13 Er1 95.88(17) . . ? 
Er1 O13 Er1 110.09(19) 2_765 . ? 
Er2 O13 H13B 114.2 . . ? 
Er1 O13 H13B 114.2 2_765 . ? 
Er1 O13 H13B 114.2 . . ? 
Er1 O14 Er3 100.32(15) . . ? 
Er1 O14 Er2 95.74(17) . . ? 
Er3 O14 Er2 94.74(17) . . ? 
Er1 O14 H14B 120.2 . . ? 
Er3 O14 H14B 120.2 . . ? 
Er2 O14 H14B 120.2 . . ? 
Er5 O15 Er4 95.68(19) . 2_656 ? 
Er5 O15 Er4 106.44(17) . . ? 
Er4 O15 Er4 111.48(19) 2_656 . ? 
Er5 O15 H15B 113.9 . . ? 
Er4 O15 H15B 113.9 2_656 . ? 
Er4 O15 H15B 113.9 . . ? 
Er4 O16 Er6 100.28(16) 2_656 . ? 
Er4 O16 Er5 95.18(18) 2_656 . ? 
Er6 O16 Er5 95.33(18) . . ? 
Er4 O16 H16B 120.2 2_656 . ? 
Er6 O16 H16B 120.2 . . ? 
Er5 O16 H16B 120.2 . . ? 
C69 O19 Er1 131.4(5) . . ? 
C69 O19 H19C 109.5 . . ? 
Er1 O19 H19C 99.5 . . ? 
C71 O20 Er4 135.8(6) . . ? 
C71 O20 H20C 109.5 . . ? 
Er4 O20 H20C 97.5 . . ? 
C7 N1 C8 115.7(6) . . ? 
C7 N1 Er1 130.4(5) . 2_765 ? 
C8 N1 Er1 111.1(4) . 2_765 ? 
C11 N2 C10 112.7(7) . . ? 
C11 N2 Er2 132.9(6) . . ? 
C10 N2 Er2 114.4(6) . . ? 
C24 N3 C25 115.3(6) . . ? 
C24 N3 Er2 131.5(5) . . ? 
C25 N3 Er2 113.0(5) . . ? 
C28 N4 C27 117.3(7) . . ? 
C28 N4 Er3 130.2(6) . . ? 
C27 N4 Er3 112.5(4) . . ? 
C41 N5 C42 117.2(8) . . ? 
C41 N5 Er4 132.4(7) . . ? 
C42 N5 Er4 108.4(5) . . ? 
C45 N6 C44 113.4(8) . . ? 
C45 N6 Er5 129.4(6) . . ? 
C44 N6 Er5 117.1(6) . . ? 
C58 N7 C59 116.5(7) . . ? 
C58 N7 Er5 131.6(5) . . ? 
C59 N7 Er5 111.9(5) . . ? 
C62 N8 C61 117.8(7) . . ? 
C62 N8 Er6 130.3(6) . . ? 
C61 N8 Er6 111.9(5) . . ? 
O1 C1 C2 119.8(7) . . ? 
O1 C1 C6 121.8(7) . . ? 
C2 C1 C6 118.4(6) . . ? 
C1 C2 C3 120.3(8) . . ? 
C1 C2 H2A 119.8 . . ? 
C3 C2 H2A 119.8 . . ? 
C4 C3 C2 120.9(8) . . ? 
C4 C3 H3A 119.5 . . ? 
C2 C3 H3A 119.5 . . ? 
C5 C4 C3 119.5(8) . . ? 
C5 C4 H4A 120.3 . . ? 
C3 C4 H4A 120.3 . . ? 
C4 C5 C6 123.2(8) . . ? 
C4 C5 H5A 118.4 . . ? 
C6 C5 H5A 118.4 . . ? 
C5 C6 C1 117.4(8) . . ? 
C5 C6 C7 116.7(7) . . ? 
C1 C6 C7 125.8(6) . . ? 
N1 C7 C6 127.3(7) . . ? 
N1 C7 H7A 116.4 . . ? 
C6 C7 H7A 116.4 . . ? 
C9 C8 N1 103.0(7) . . ? 
C9 C8 H8A 111.1 . . ? 
N1 C8 H8A 111.1 . . ? 
C9 C8 H8B 111.3 . . ? 
N1 C8 H8B 111.1 . . ? 
H8A C8 H8B 109.1 . . ? 
O2 C9 C8 119.9(8) . . ? 
O2 C9 C10 114.4(9) . . ? 
C8 C9 C10 125.7(9) . . ? 
O2 C9 H9A 90.0 . . ? 
C8 C9 H9A 90.0 . . ? 
C10 C9 H9A 90.0 . . ? 
N2 C10 C9 116.9(9) . . ? 
N2 C10 H10B 108.1 . . ? 
C9 C10 H10B 108.0 . . ? 
N2 C10 H10A 108.0 . . ? 
C9 C10 H10A 108.2 . . ? 
H10B C10 H10A 107.3 . . ? 
N2 C11 C12 124.8(7) . . ? 
N2 C11 H11A 117.6 . . ? 
C12 C11 H11A 117.6 . . ? 
C17 C12 C13 118.7(8) . . ? 
C17 C12 C11 123.7(8) . . ? 
C13 C12 C11 117.5(7) . . ? 
C14 C13 C12 122.7(7) . . ? 
C14 C13 H13A 118.6 . . ? 
C12 C13 H13A 118.7 . . ? 
C13 C14 C15 118.1(8) . . ? 
C13 C14 H14A 120.9 . . ? 
C15 C14 H14A 120.9 . . ? 
C14 C15 C16 121.7(8) . . ? 
C14 C15 H15A 119.1 . . ? 
C16 C15 H15A 119.1 . . ? 
C15 C16 C17 119.9(7) . . ? 
C15 C16 H16A 120.0 . . ? 
C17 C16 H16A 120.0 . . ? 
O3 C17 C12 122.6(7) . . ? 
O3 C17 C16 118.7(6) . . ? 
C12 C17 C16 118.7(7) . . ? 
O4 C18 C19 119.8(7) . . ? 
O4 C18 C23 124.2(6) . . ? 
C19 C18 C23 116.0(7) . . ? 
C20 C19 C18 122.2(8) . . ? 
C20 C19 H19A 118.9 . . ? 
C18 C19 H19A 118.9 . . ? 
C19 C20 C21 122.1(8) . . ? 
C19 C20 H20A 118.9 . . ? 
C21 C20 H20A 118.9 . . ? 
C20 C21 C22 117.1(9) . . ? 
C20 C21 H21A 121.5 . . ? 
C22 C21 H21A 121.5 . . ? 
C23 C22 C21 123.3(9) . . ? 
C23 C22 H22A 118.3 . . ? 
C21 C22 H22A 118.3 . . ? 
C22 C23 C18 119.0(7) . . ? 
C22 C23 C24 119.8(8) . . ? 
C18 C23 C24 121.1(8) . . ? 
N3 C24 C23 128.2(7) . . ? 
N3 C24 H24A 115.9 . . ? 
C23 C24 H24A 115.9 . . ? 
N3 C25 C26 109.8(6) . . ? 
N3 C25 H25A 109.7 . . ? 
C26 C25 H25A 109.7 . . ? 
N3 C25 H25B 109.7 . . ? 
C26 C25 H25B 109.7 . . ? 
H25A C25 H25B 108.2 . . ? 
O5 C26 C27 109.4(6) . . ? 
O5 C26 C25 109.3(6) . . ? 
C27 C26 C25 109.7(6) . . ? 
O5 C26 H26A 109.5 . . ? 
C27 C26 H26A 109.5 . . ? 
C25 C26 H26A 109.5 . . ? 
N4 C27 C26 110.6(6) . . ? 
N4 C27 H27B 109.5 . . ? 
C26 C27 H27B 109.5 . . ? 
N4 C27 H27A 109.5 . . ? 
C26 C27 H27A 109.5 . . ? 
H27B C27 H27A 108.1 . . ? 
N4 C28 C29 127.0(8) . . ? 
N4 C28 H28A 116.5 . . ? 
C29 C28 H28A 116.5 . . ? 
C34 C29 C30 118.7(8) . . ? 
C34 C29 C28 123.9(7) . . ? 
C30 C29 C28 117.4(8) . . ? 
C31 C30 C29 121.5(9) . . ? 
C31 C30 H30A 119.3 . . ? 
C29 C30 H30A 119.3 . . ? 
C32 C31 C30 119.7(9) . . ? 
C32 C31 H31A 120.1 . . ? 
C30 C31 H31A 120.1 . . ? 
C31 C32 C33 121.8(10) . . ? 
C31 C32 H32A 119.1 . . ? 
C33 C32 H32A 119.1 . . ? 
C34 C33 C32 118.7(9) . . ? 
C34 C33 H33A 120.7 . . ? 
C32 C33 H33A 120.7 . . ? 
O6 C34 C29 122.5(8) . . ? 
O6 C34 C33 117.8(8) . . ? 
C29 C34 C33 119.6(8) . . ? 
O7 C35 C40 121.7(9) . . ? 
O7 C35 C36 120.1(8) . . ? 
C40 C35 C36 118.2(8) . . ? 
C37 C36 C35 119.4(10) . . ? 
C37 C36 H36A 120.3 . . ? 
C35 C36 H36A 120.3 . . ? 
C38 C37 C36 122.5(13) . . ? 
C38 C37 H37A 118.8 . . ? 
C36 C37 H37A 118.7 . . ? 
C37 C38 C39 121.3(11) . . ? 
C37 C38 H38A 119.3 . . ? 
C39 C38 H38A 119.4 . . ? 
C38 C39 C40 119.0(11) . . ? 
C38 C39 H39A 120.5 . . ? 
C40 C39 H39A 120.5 . . ? 
C35 C40 C39 119.5(10) . . ? 
C35 C40 C41 124.6(8) . . ? 
C39 C40 C41 115.8(9) . . ? 
N5 C41 C40 127.7(8) . . ? 
N5 C41 H41A 116.2 . . ? 
C40 C41 H41A 116.2 . . ? 
N5 C42 C43 102.2(8) . . ? 
N5 C42 H42A 111.3 . . ? 
C43 C42 H42A 111.3 . . ? 
N5 C42 H42B 111.3 . . ? 
C43 C42 H42B 111.3 . . ? 
H42A C42 H42B 109.2 . . ? 
O8 C43 C42 117.9(8) . . ? 
O8 C43 C44 119.5(9) . . ? 
C42 C43 C44 117.8(8) . . ? 
O8 C43 H43A 97.3 . . ? 
C42 C43 H43A 97.3 . . ? 
C44 C43 H43A 97.3 . . ? 
N6 C44 C43 111.1(9) . . ? 
N6 C44 H44B 109.4 . . ? 
C43 C44 H44B 109.4 . . ? 
N6 C44 H44A 109.4 . . ? 
C43 C44 H44A 109.4 . . ? 
H44B C44 H44A 108.0 . . ? 
N6 C45 C46 125.7(8) . . ? 
N6 C45 H45A 117.2 . . ? 
C46 C45 H45A 117.2 . . ? 
C51 C46 C47 117.9(8) . . ? 
C51 C46 C45 124.7(8) . . ? 
C47 C46 C45 117.0(7) . . ? 
C48 C47 C46 122.3(8) . . ? 
C48 C47 H47A 118.8 . . ? 
C46 C47 H47A 118.8 . . ? 
C49 C48 C47 119.1(9) . . ? 
C49 C48 H48A 120.4 . . ? 
C47 C48 H48A 120.4 . . ? 
C48 C49 C50 120.9(9) . . ? 
C48 C49 H49A 119.5 . . ? 
C50 C49 H49A 119.5 . . ? 
C51 C50 C49 120.5(7) . . ? 
C51 C50 H50A 119.8 . . ? 
C49 C50 H50A 119.8 . . ? 
O9 C51 C50 119.7(6) . . ? 
O9 C51 C46 121.0(7) . . ? 
C50 C51 C46 119.2(7) . . ? 
O10 C52 C53 118.1(8) . . ? 
O10 C52 C57 123.3(8) . . ? 
C53 C52 C57 118.5(8) . . ? 
C52 C53 C54 118.7(9) . . ? 
C52 C53 H53A 120.7 . . ? 
C54 C53 H53A 120.7 . . ? 
C55 C54 C53 121.8(10) . . ? 
C55 C54 H54A 119.1 . . ? 
C53 C54 H54A 119.1 . . ? 
C54 C55 C56 120.5(10) . . ? 
C54 C55 H55A 119.8 . . ? 
C56 C55 H55A 119.8 . . ? 
C55 C56 C57 121.5(9) . . ? 
C55 C56 H56A 119.2 . . ? 
C57 C56 H56A 119.3 . . ? 
C56 C57 C52 119.0(8) . . ? 
C56 C57 C58 118.2(8) . . ? 
C52 C57 C58 122.8(8) . . ? 
N7 C58 C57 127.7(8) . . ? 
N7 C58 H58A 116.1 . . ? 
C57 C58 H58A 116.1 . . ? 
N7 C59 C60 110.6(7) . . ? 
N7 C59 H59A 109.5 . . ? 
C60 C59 H59A 109.5 . . ? 
N7 C59 H59B 109.5 . . ? 
C60 C59 H59B 109.5 . . ? 
H59A C59 H59B 108.1 . . ? 
O11 C60 C61 110.2(7) . . ? 
O11 C60 C59 109.9(6) . . ? 
C61 C60 C59 111.0(7) . . ? 
O11 C60 H60A 108.6 . . ? 
C61 C60 H60A 108.6 . . ? 
C59 C60 H60A 108.6 . . ? 
N8 C61 C60 111.1(6) . . ? 
N8 C61 H61A 109.4 . . ? 
C60 C61 H61A 109.4 . . ? 
N8 C61 H61B 109.4 . . ? 
C60 C61 H61B 109.4 . . ? 
H61A C61 H61B 108.0 . . ? 
N8 C62 C63 127.6(8) . . ? 
N8 C62 H62A 116.2 . . ? 
C63 C62 H62A 116.2 . . ? 
C64 C63 C68 119.9(10) . . ? 
C64 C63 C62 118.5(9) . . ? 
C68 C63 C62 121.6(8) . . ? 
C63 C64 C65 120.8(10) . . ? 
C63 C64 H64A 119.6 . . ? 
C65 C64 H64A 119.6 . . ? 
C66 C65 C64 120.1(10) . . ? 
C66 C65 H65A 119.9 . . ? 
C64 C65 H65A 119.9 . . ? 
C67 C66 C65 119.3(11) . . ? 
C67 C66 H66A 120.3 . . ? 
C65 C66 H66A 120.3 . . ? 
C66 C67 C68 122.9(9) . . ? 
C66 C67 H67A 118.5 . . ? 
C68 C67 H67A 118.5 . . ? 
O12 C68 C63 123.7(9) . . ? 
O12 C68 C67 119.4(8) . . ? 
C63 C68 C67 116.9(8) . . ? 
O19 C69 C70 114.7(7) . . ? 
O19 C69 H69A 108.6 . . ? 
C70 C69 H69A 108.6 . . ? 
O19 C69 H69B 108.6 . . ? 
C70 C69 H69B 108.6 . . ? 
H69A C69 H69B 107.6 . . ? 
C69 C70 H70A 109.5 . . ? 
C69 C70 H70B 109.5 . . ? 
H70A C70 H70B 109.5 . . ? 
C69 C70 H70C 109.5 . . ? 
H70A C70 H70C 109.5 . . ? 
H70B C70 H70C 109.5 . . ? 
O20 C71 C72 116.8(11) . . ? 
O20 C71 H71A 108.1 . . ? 
C72 C71 H71A 108.1 . . ? 
O20 C71 H71B 108.1 . . ? 
C72 C71 H71B 108.1 . . ? 
H71A C71 H71B 107.3 . . ? 
C71 C72 H72A 109.5 . . ? 
C71 C72 H72B 109.5 . . ? 
H72A C72 H72B 109.5 . . ? 
C71 C72 H72C 109.5 . . ? 
H72A C72 H72C 109.5 . . ? 
H72B C72 H72C 109.5 . . ? 
C73 O21 H21B 109.5 . . ? 
O21 C73 C74 108.9(10) . . ? 
O21 C73 H73A 109.9 . . ? 
C74 C73 H73A 109.9 . . ? 
O21 C73 H73B 109.9 . . ? 
C74 C73 H73B 109.9 . . ? 
H73A C73 H73B 108.3 . . ? 
C73 C74 H1WB 109.5 . . ? 
C73 C74 H1WC 109.5 . . ? 
H1WB C74 H1WC 109.5 . . ? 
C73 C74 H1WD 109.5 . . ? 
H1WB C74 H1WD 109.5 . . ? 
H1WC C74 H1WD 109.5 . . ? 
C75 O22 H22C 109.5 . . ? 
O22 C75 H75A 109.5 . . ? 
O22 C75 H75B 109.5 . . ? 
H75A C75 H75B 109.5 . . ? 
O22 C75 H75C 109.5 . . ? 
H75A C75 H75C 109.5 . . ? 
H75B C75 H75C 109.5 . . ? 
O23 C76 H76A 109.5 . . ? 
O23 C76 H76B 109.5 . . ? 
H76A C76 H76B 109.5 . . ? 
O23 C76 H76C 109.5 . . ? 
H76A C76 H76C 109.5 . . ? 
H76B C76 H76C 109.5 . . ? 
C76 O23 H23A 109.5 . . ? 
C76' O23' H23D 109.5 . . ? 
O23' C76' H76D 109.5 . . ? 
O23' C76' H76E 109.5 . . ? 
H76D C76' H76E 109.5 . . ? 
O23' C76' H76F 109.5 . . ? 
H76D C76' H76F 109.5 . . ? 
H76E C76' H76F 109.5 . . ? 
 
_diffrn_measured_fraction_theta_max    0.995 
_diffrn_reflns_theta_full              25.00 
_diffrn_measured_fraction_theta_full   0.995 
_refine_diff_density_max    2.942 
_refine_diff_density_min   -1.036 
_refine_diff_density_rms    0.189 

#===END
